# Supplementary material
Source: PubMed Central journal article supplement (PMC6645772)
Supplement: ao7b01824_si_001.pdf [file ao7b01824_si_001.pdf]

*Supporting Information*

*For*

**Formation of 2-Imino benzo[*e*]-1,3-oxazin-4-ones from Reactions of Salicylic Acids and Anilines with HATU: Mechanistic and Synthetic Studies**

Derek A. Leas,<sup>†</sup> Jianbo Wu,<sup>†</sup> Edward L. Ezell,<sup>‡</sup> Jered C. Garrison,<sup>†</sup> Jonathan L. Vennerstrom,<sup>†</sup>  
and Yuxiang Dong<sup>\*,†</sup>

<sup>†</sup>College of Pharmacy and <sup>‡</sup>Eppley Institute for Research in Cancer, University of Nebraska  
Medical Center, Omaha, NE 68198, United States

ydong@unmc.edu

**Table of Contents:**

|                                                                                   |     |
|-----------------------------------------------------------------------------------|-----|
| 1. Crystallographic data                                                          | S2  |
| 2. <sup>1</sup> H and <sup>13</sup> C NMR spectra                                 | S4  |
| 3. 2D NMR spectra for compounds <b>4c</b> , <b>4d</b> , <b>4f</b> , and <b>10</b> | S36 |
| 4. References                                                                     | S71 |

## Crystallographic Data

Single crystals of  $C_{21}H_{15}N_2O_2Br$  (**4f**) were grown via slow evaporation of EtOAc. A suitable crystal was selected and mounted on a CyroLoop<sup>TM</sup> using paratone oil on a Xcalibur, Onyx, Ultra diffractometer. The crystal was kept at 100 K during data collection. Using Olex2<sup>1</sup>, the structure was solved with the ShelXS<sup>2</sup> structure solution program using Direct Methods and refined with the ShelXL<sup>3</sup> refinement package using Least Squares minimization.

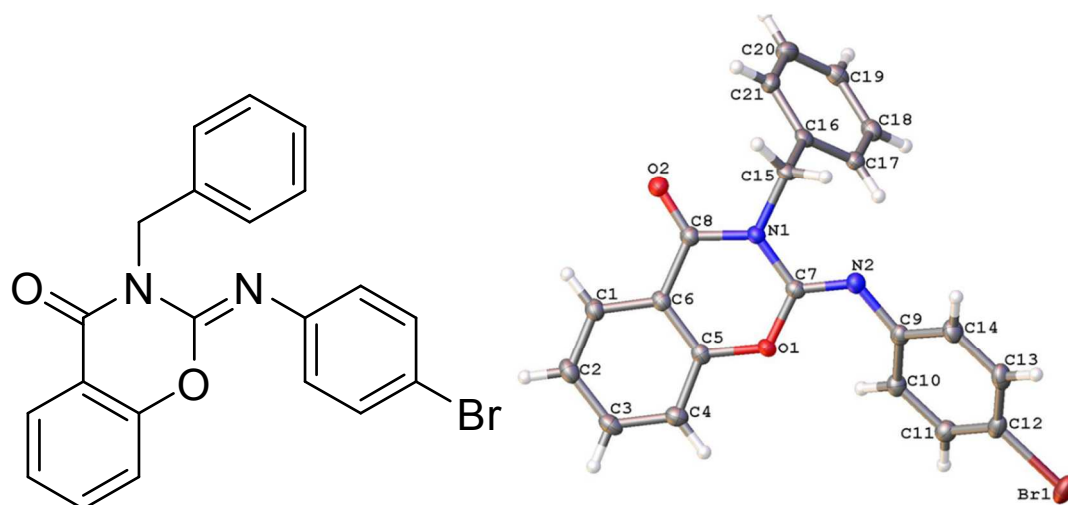

Olex2 view – 50% probability level

**Figure S1.** Structural features of (*Z*)-3-benzyl-2-((4-bromophenyl)imino)-2,3-dihydro-4H-benzo[e][1,3]oxazin-4-one (**4f**).

**Table S1.** Crystal data and structure refinement

|                   |                        |
|-------------------|------------------------|
| Empirical formula | $C_{21}H_{15}N_2O_2Br$ |
| Formula weight    | 407.26                 |
| Temperature/K     | 100                    |
| Crystal system    | monoclinic             |
| Space group       | $P2_1/c$               |
| $a/\text{\AA}$    | 10.92936(8)            |
| $b/\text{\AA}$    | 12.80330(9)            |
| $c/\text{\AA}$    | 13.37608(11)           |

|                                               |                                                               |
|-----------------------------------------------|---------------------------------------------------------------|
| $\alpha/^\circ$                               | 90                                                            |
| $\beta/^\circ$                                | 112.0814(9)                                                   |
| $\gamma/^\circ$                               | 90                                                            |
| Volume/ $\text{\AA}^3$                        | 1734.45(2)                                                    |
| Z                                             | 4                                                             |
| $\rho_{\text{calc}}/\text{g/cm}^3$            | 1.560                                                         |
| $\mu/\text{mm}^{-1}$                          | 3.379                                                         |
| F(000)                                        | 824.0                                                         |
| Crystal size/ $\text{mm}^3$                   | $0.3 \times 0.3 \times 0.05$                                  |
| Radiation                                     | CuK $\alpha$ ( $\lambda = 1.54184$ )                          |
| $2\Theta$ range for data collection/ $^\circ$ | 8.732 to 152.33                                               |
| Index ranges                                  | $-13 \leq h \leq 13, -16 \leq k \leq 16, -16 \leq l \leq 16$  |
| Reflections collected                         | 59123                                                         |
| Independent reflections                       | 3619 [ $R_{\text{int}} = 0.0578, R_{\text{sigma}} = 0.0164$ ] |
| Data/restraints/parameters                    | 3619/0/235                                                    |
| Goodness-of-fit on $F^2$                      | 1.045                                                         |
| Final R indexes [ $I \geq 2\sigma(I)$ ]       | $R_1 = 0.0307, wR_2 = 0.0806$                                 |
| Final R indexes [all data]                    | $R_1 = 0.0324, wR_2 = 0.0822$                                 |
| Largest diff. peak/hole / $e \text{\AA}^{-3}$ | 0.27/-0.56                                                    |

**Figure S2.**  $^1\text{H}$  NMR (500 MHz,  $\text{CDCl}_3$ ) spectrum of compound **4a**.

DL3-075A\_H1\_Sep20-2017-JLVlab.10.fid  
DL3-075A,  $\text{CDCl}_3$

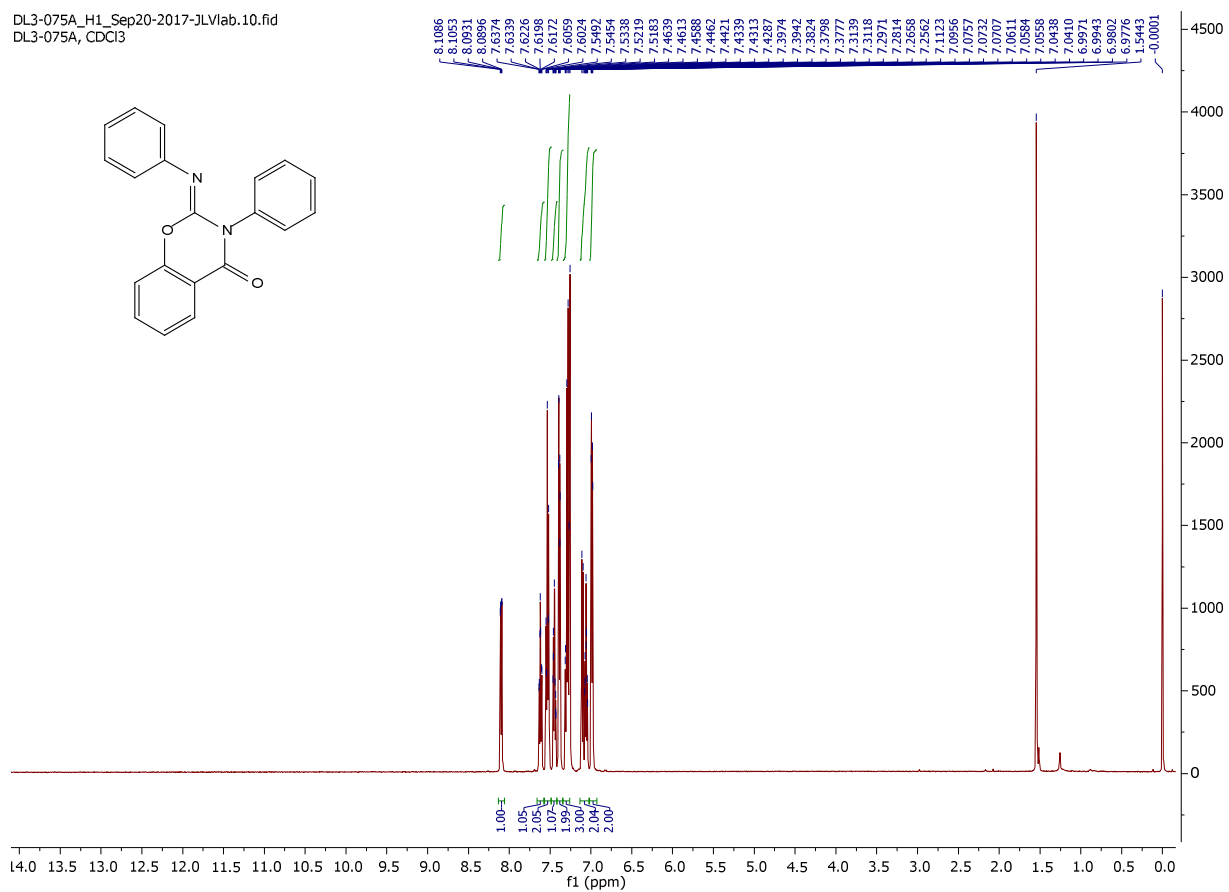



**Figure S3.**  $^{13}\text{C}$  NMR (125 MHz,  $\text{CDCl}_3$ ) spectrum of compound **4a**.

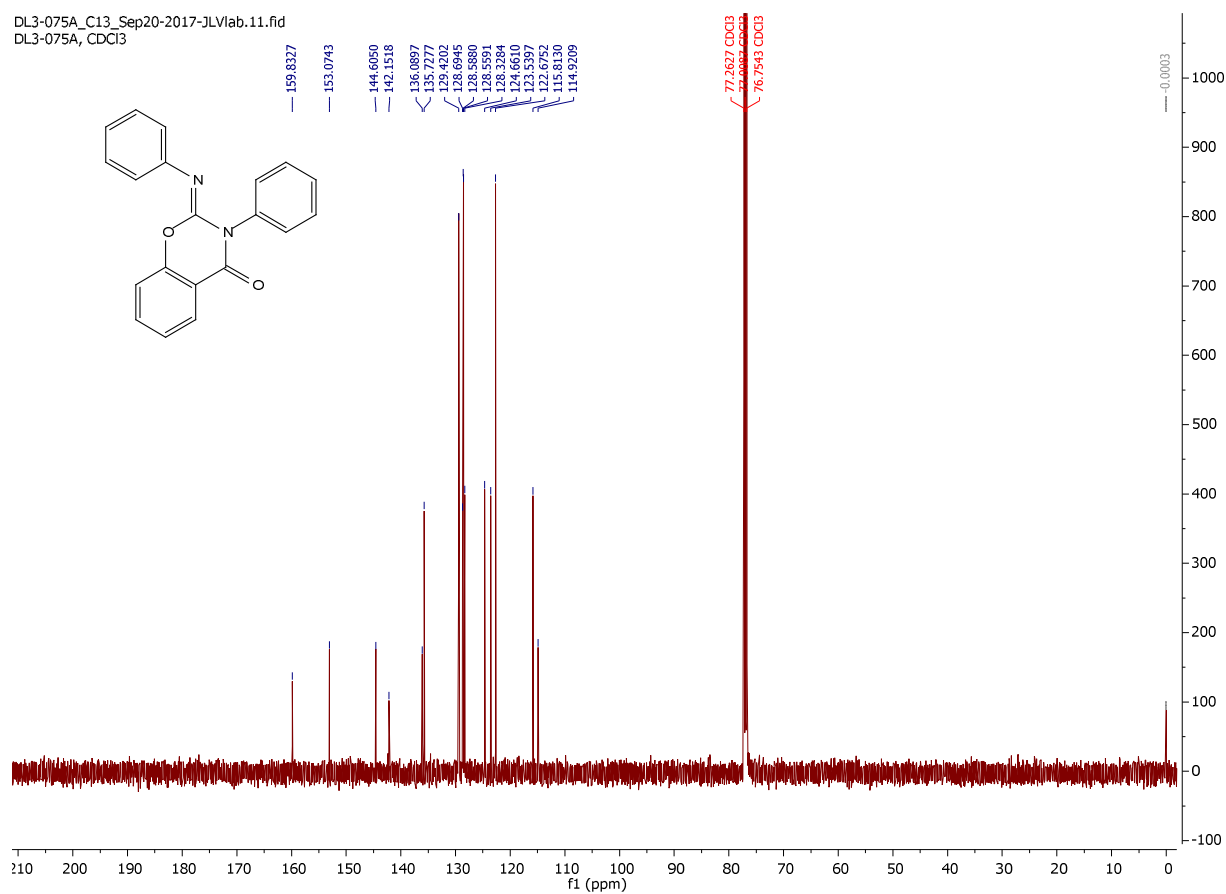

**Figure S4.**  $^1\text{H}$  NMR (500 MHz,  $\text{CDCl}_3$ ) spectrum of compound **4b**.

DL3-062A\_H1\_Jun13-2017-JLVlab.20.fid  
sample 1,  $\text{CDCl}_3$

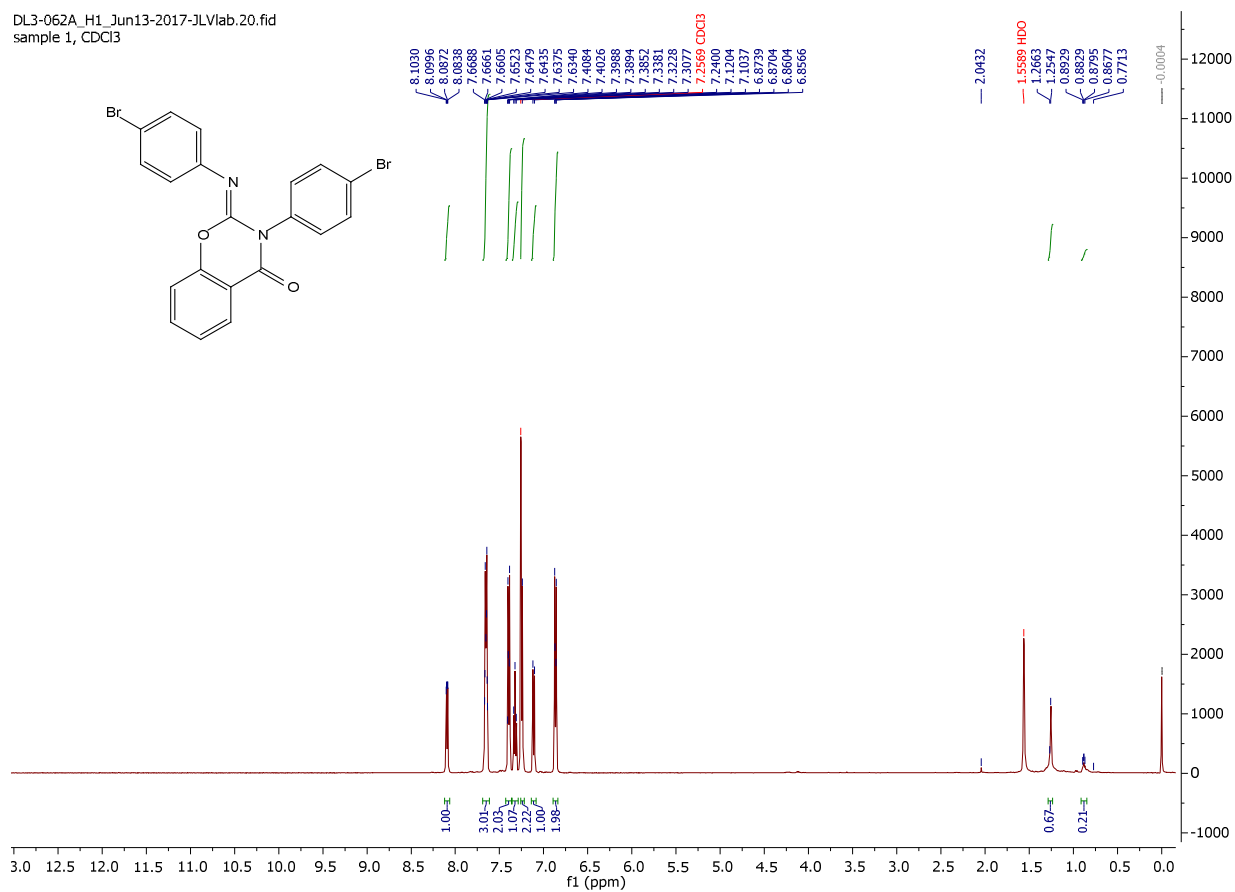

**Figure S5.**  $^1\text{H}$  NMR (125 MHz,  $\text{CDCl}_3$ ) spectrum of compound **4b**.

DL3-062A\_C13\_Jun13-2017-JLV\lab\21.fid  
sample 1,  $\text{CDCl}_3$

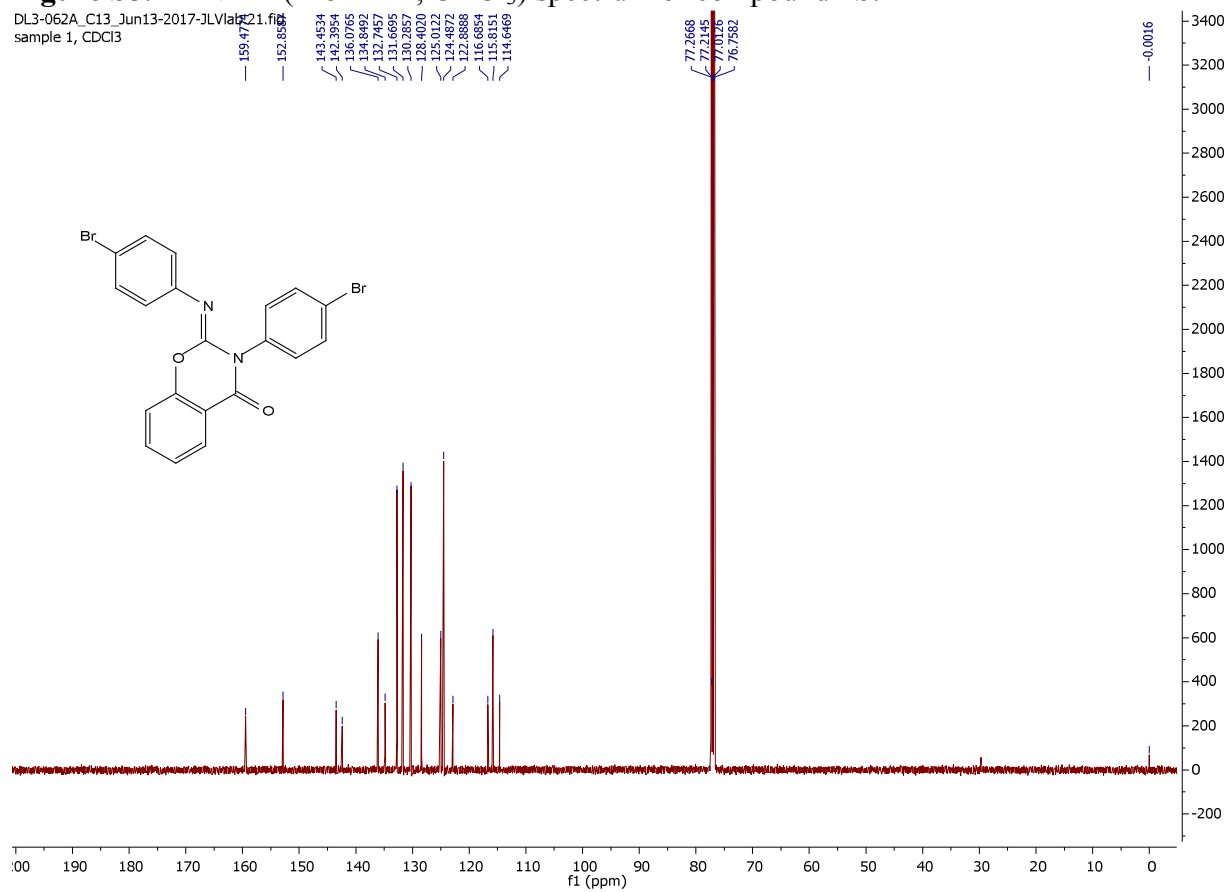

**Figure S6.**  $^1\text{H}$  NMR (500 MHz,  $\text{DMSO-}d_6$ ) spectrum of compound **5**.

DL3-03salt\_H1\_Jun13-2017-3LVlab.10.fid  
sample 3, salt, dms0

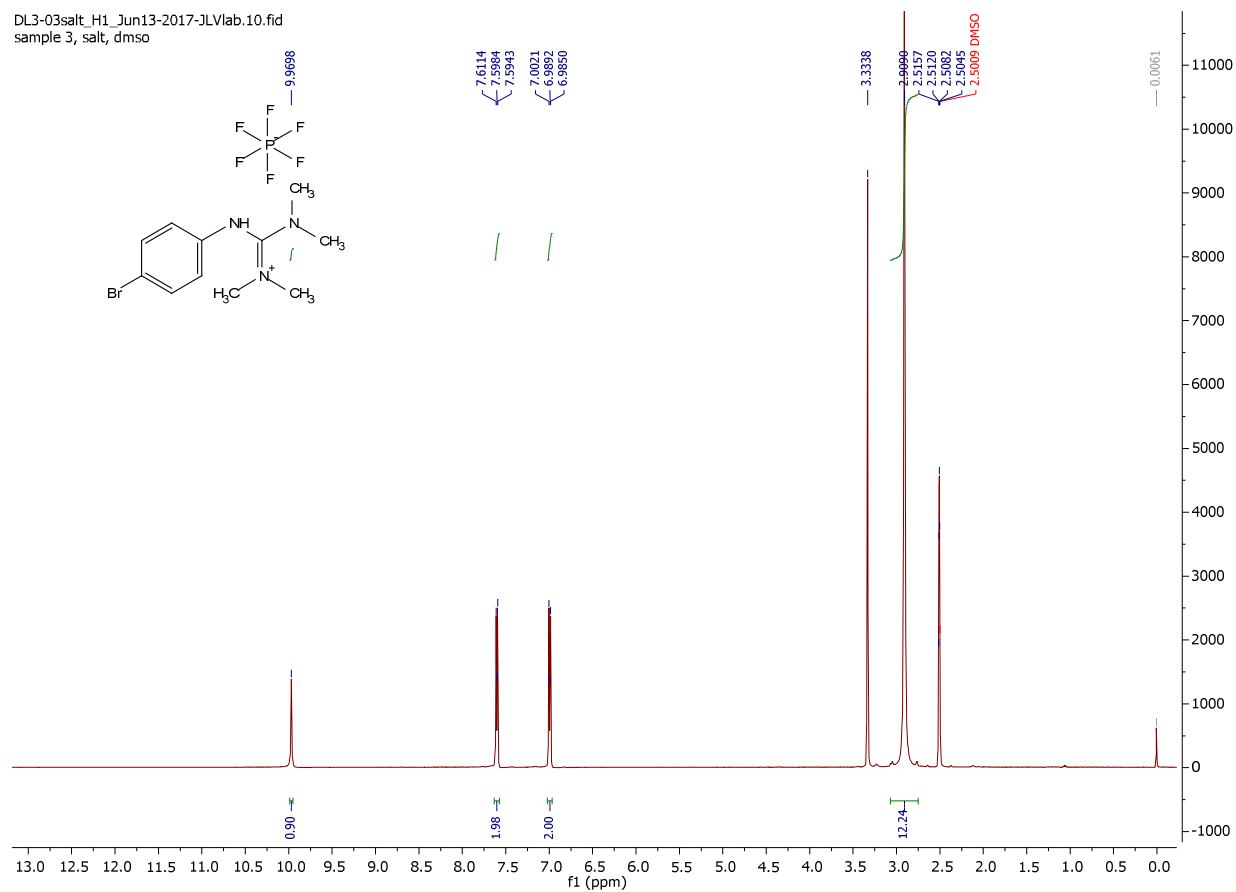

**Figure S7.**  $^{13}\text{C}$  NMR (125 MHz,  $\text{DMSO-}d_6$ ) spectrum of compound **5**.

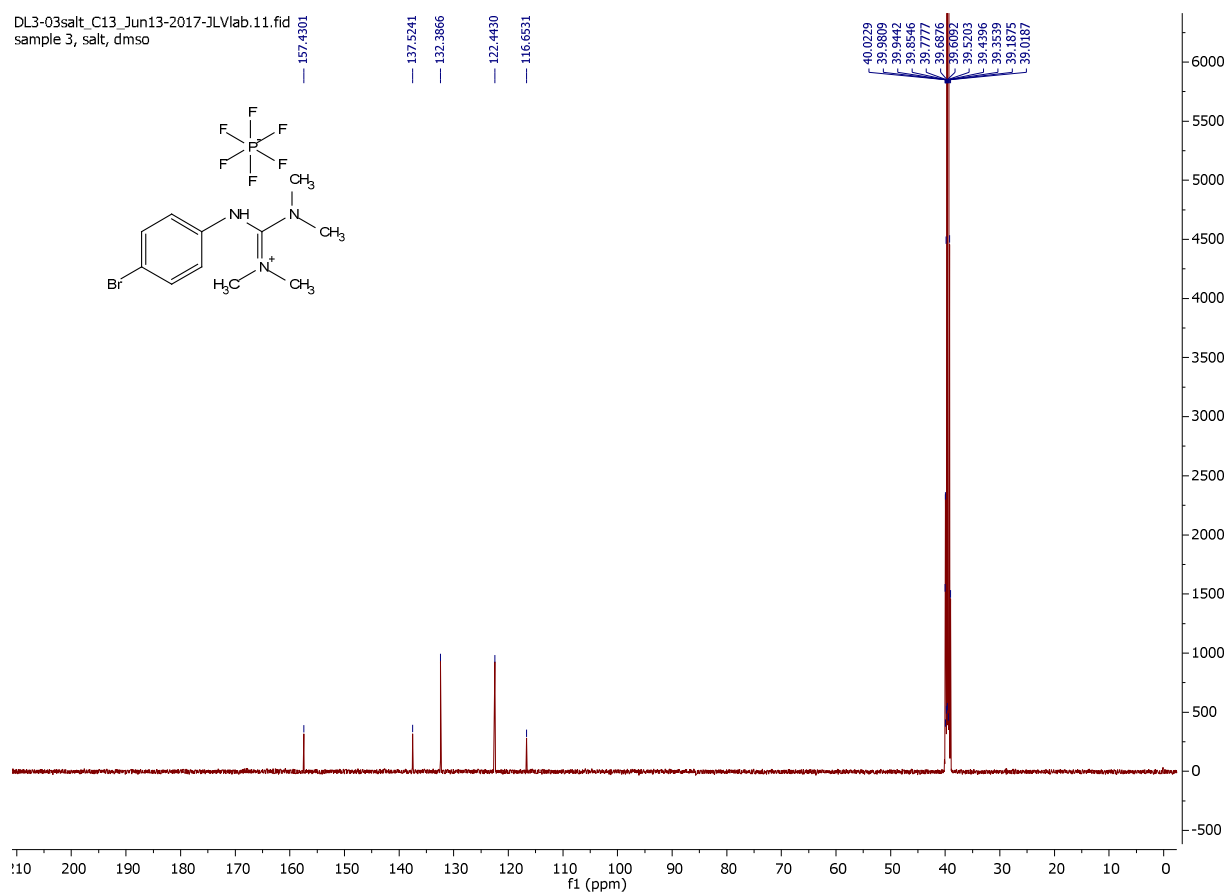

**Figure S8.**  $^1\text{H}$  NMR (500 MHz,  $\text{CDCl}_3$ ) spectrum of compound **6**.

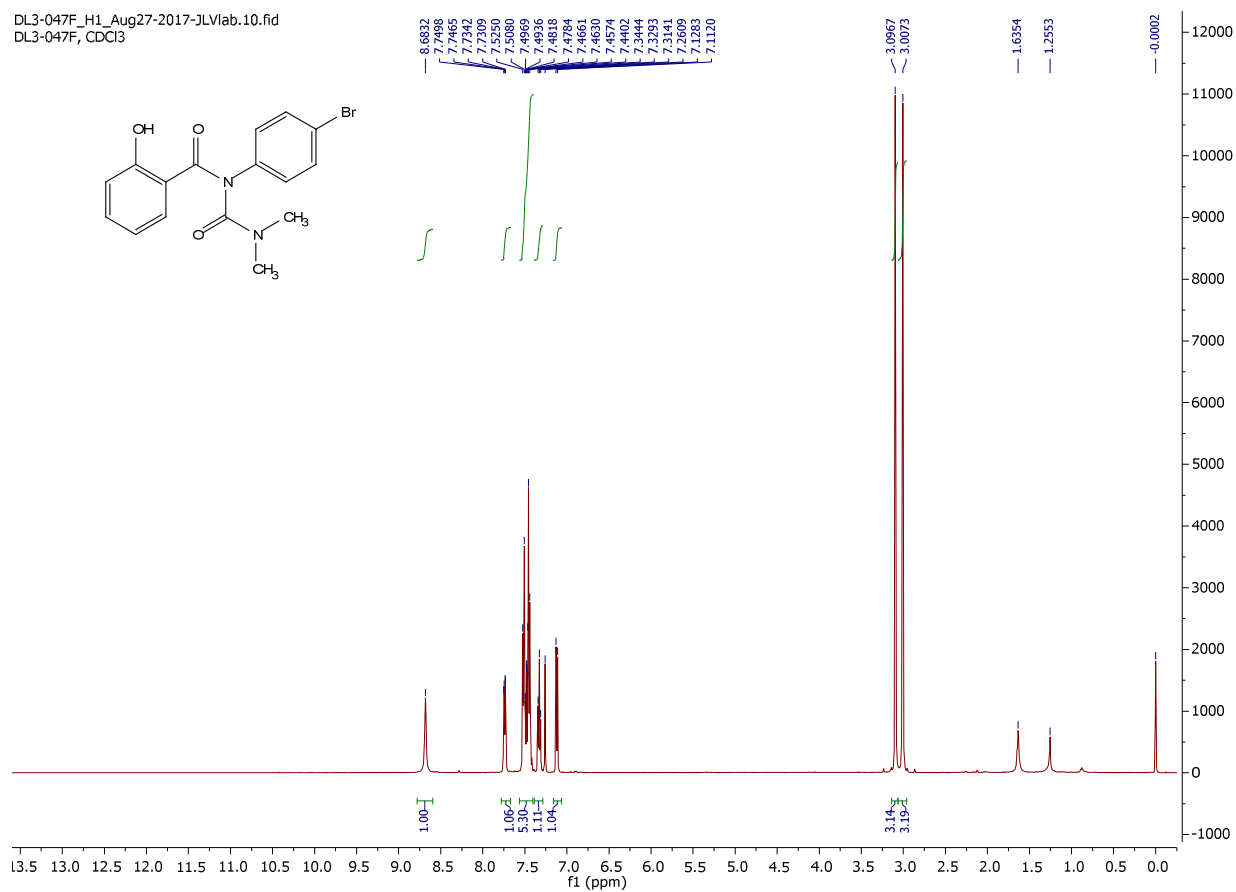

**Figure S9.**  $^{13}\text{C}$  NMR (125 MHz,  $\text{CDCl}_3$ ) spectrum of compound **6**.

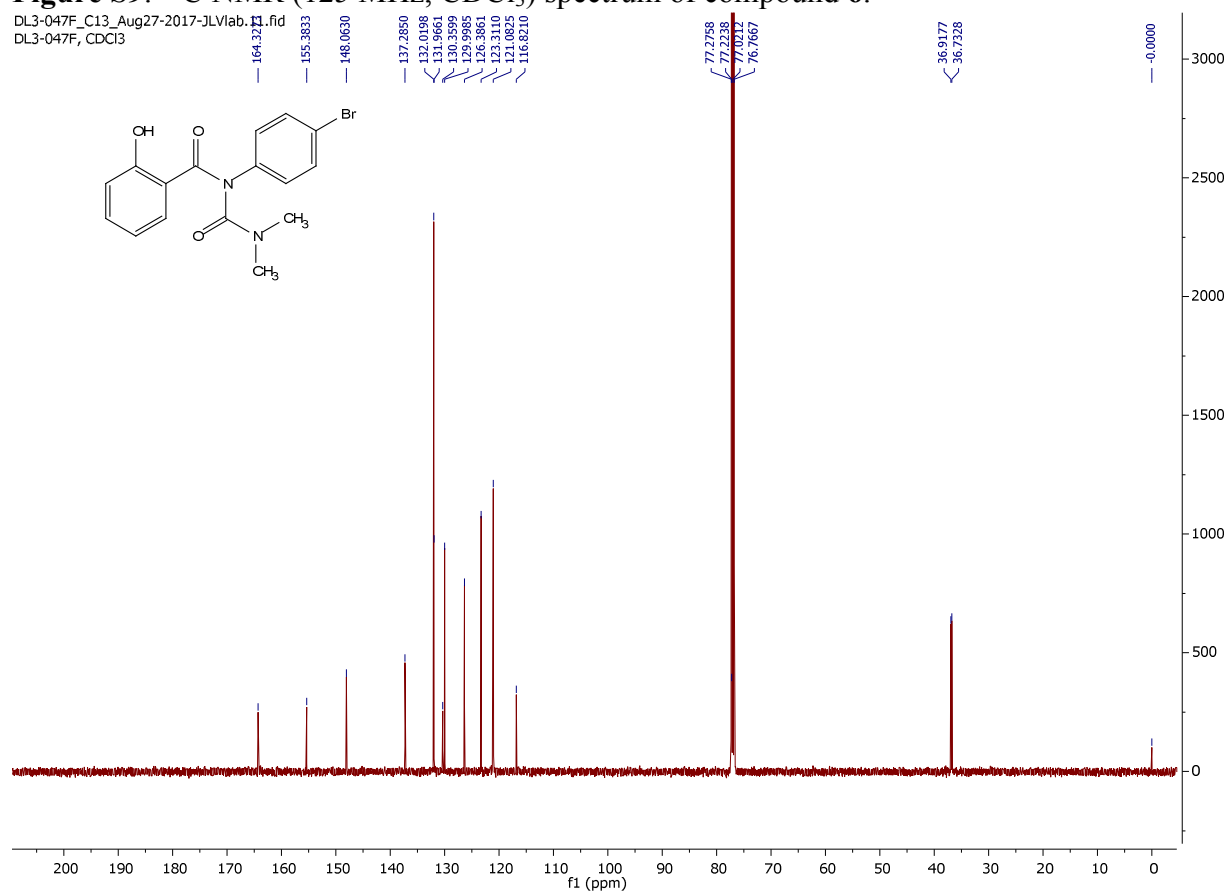

**Figure S10.**  $^1\text{H}$  NMR (500 MHz,  $\text{DMSO-}d_6$ ) spectrum of compound **7**.

DL3-083B\_H1\_Aug27-2017-JLVlab.20.fid  
DL3-083B, DMSO

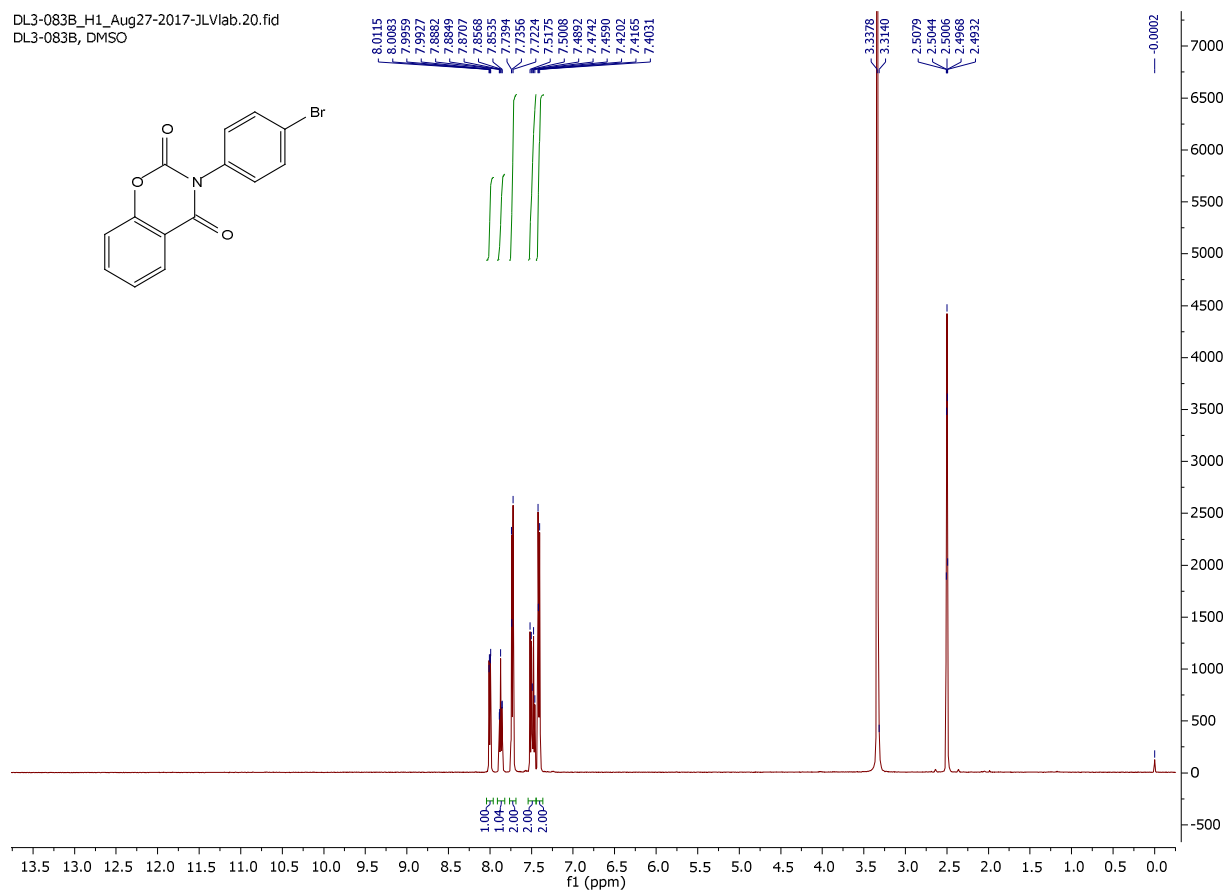



Figure S11.  $^{13}\text{C}$  NMR (125 MHz,  $\text{DMSO}-d_6$ ) spectrum of compound 7.

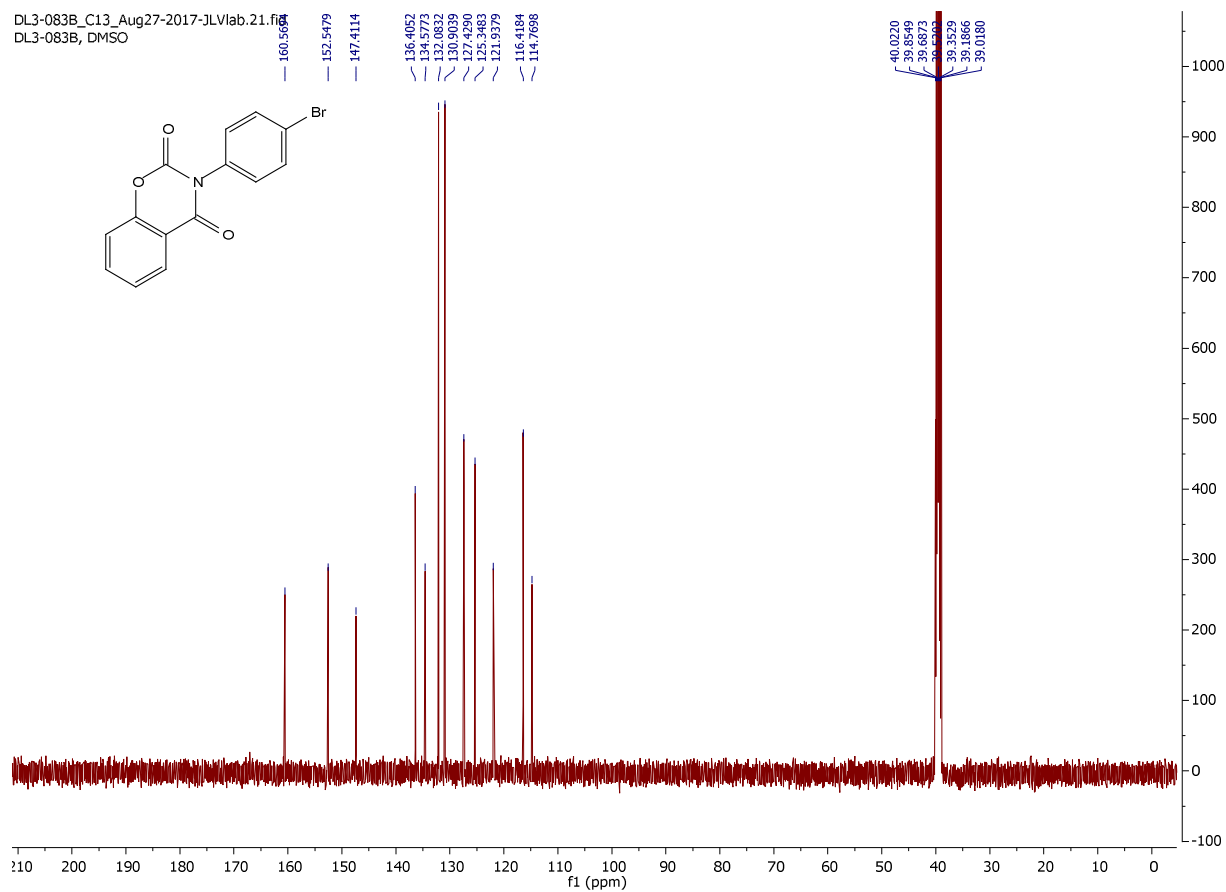

Figure S12. <sup>1</sup>H NMR (600 MHz, CDCl<sub>3</sub>) spectrum of compound 4c.

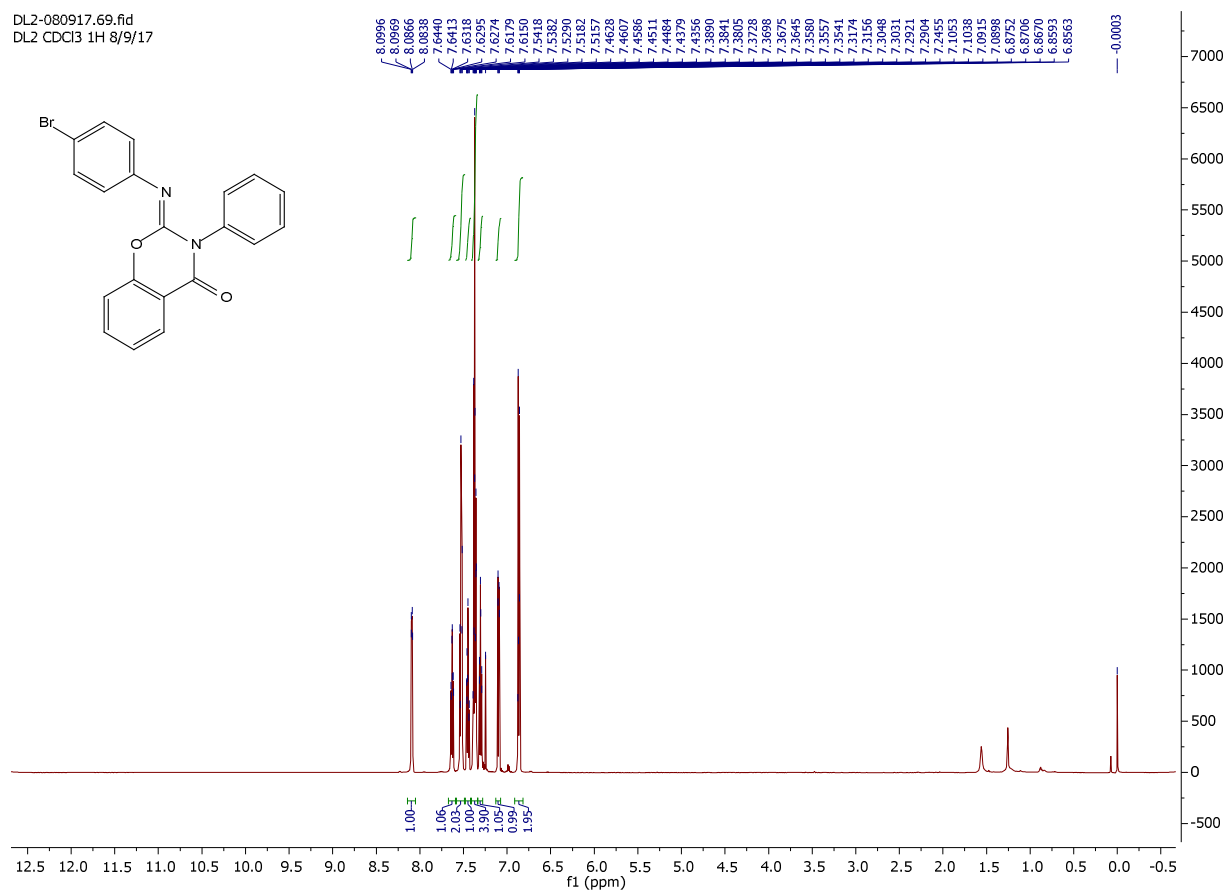

**Figure S13.**  $^{13}\text{C}$  NMR (150 MHz,  $\text{CDCl}_3$ ) spectrum of compound **4c**.

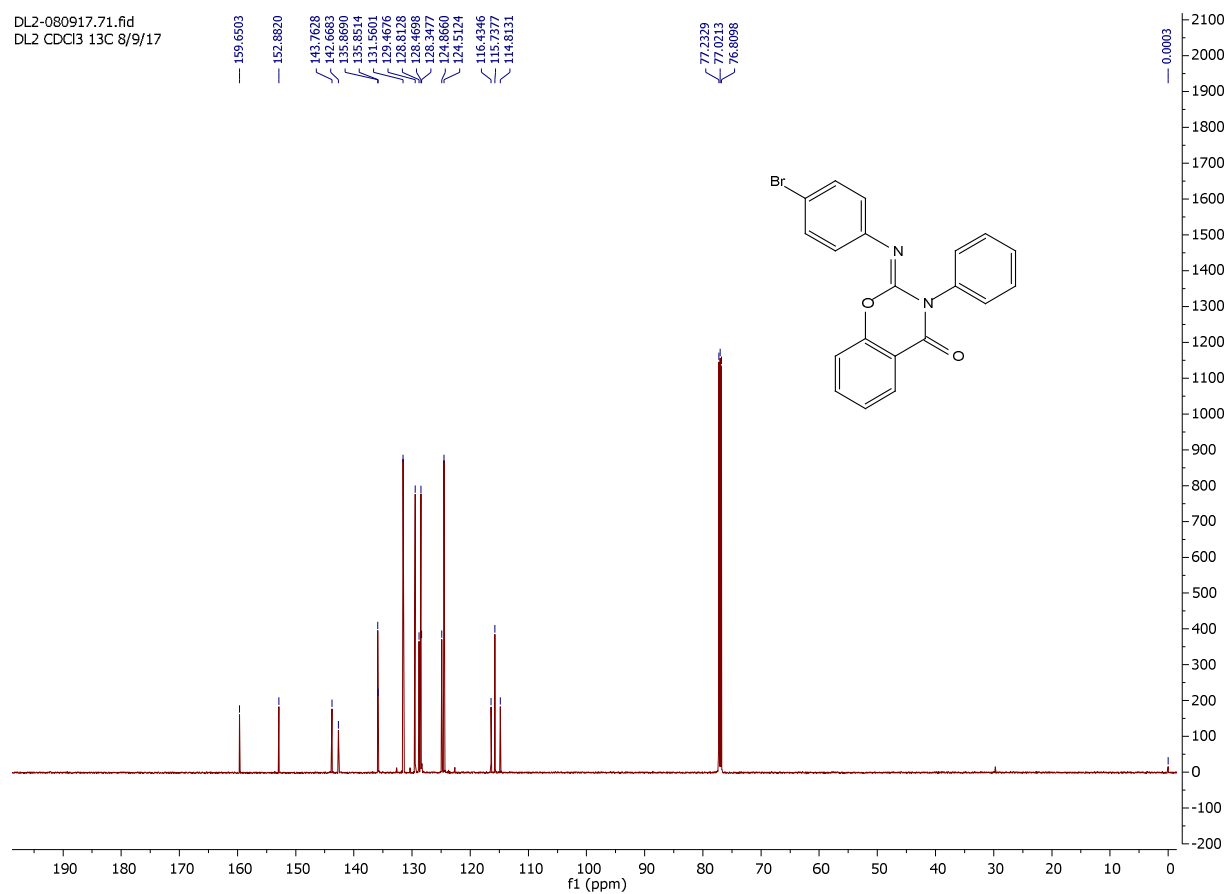

Figure S14. <sup>1</sup>H NMR (600 MHz, CDCl<sub>3</sub>) spectrum of compound 4d.

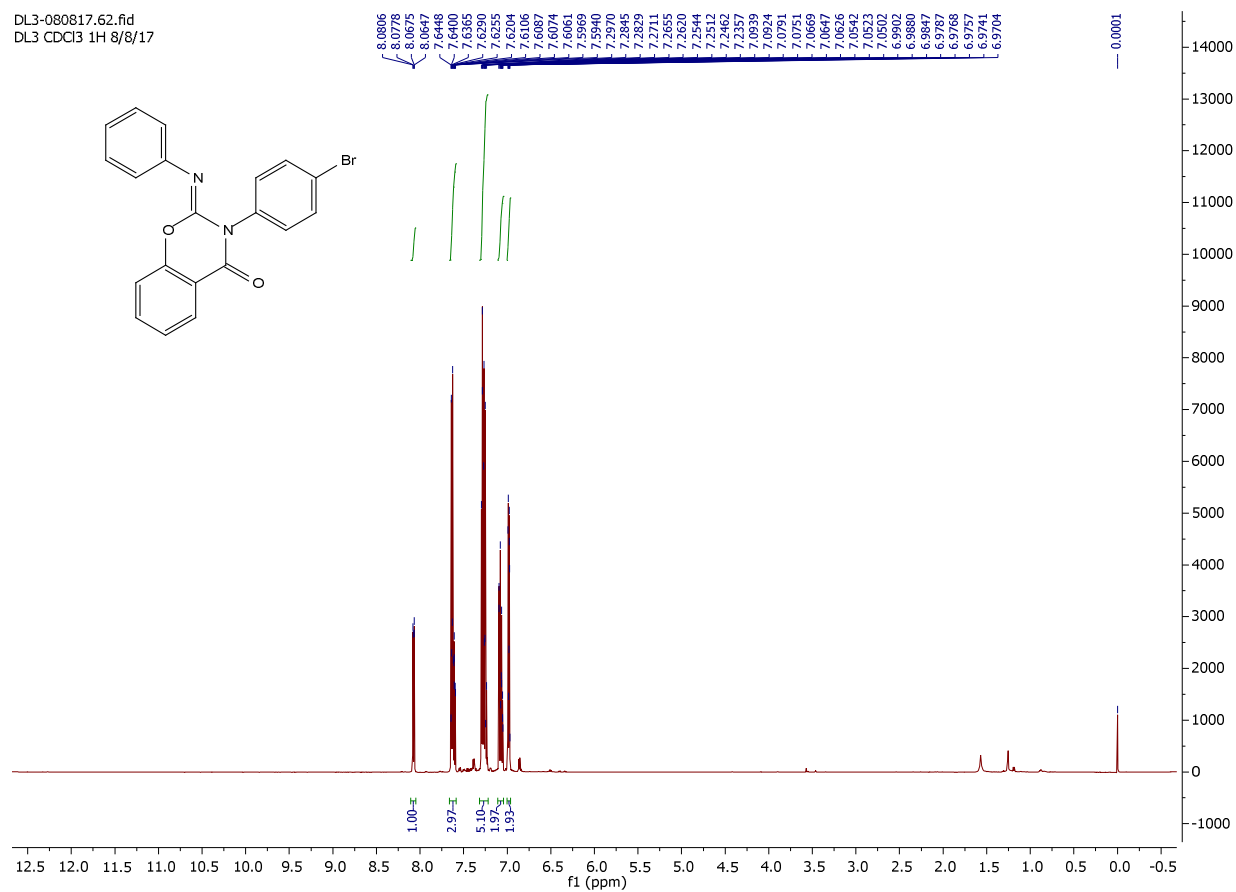

**Figure S15.**  $^{13}\text{C}$  NMR (150 MHz,  $\text{CDCl}_3$ ) spectrum of compound **4d**.

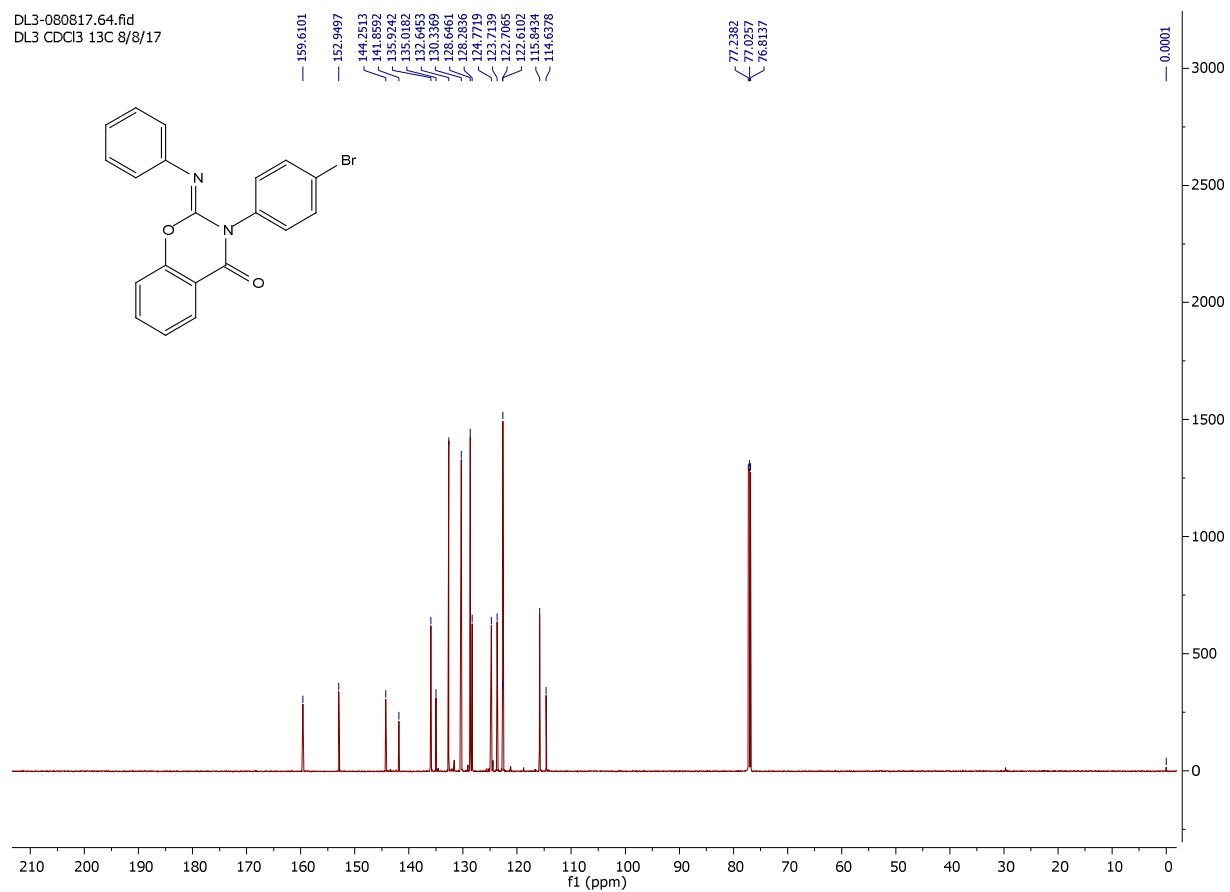

**Figure S16.**  $^1\text{H}$  NMR (400 MHz,  $\text{CDCl}_3$ ) spectrum of compound **3b**.

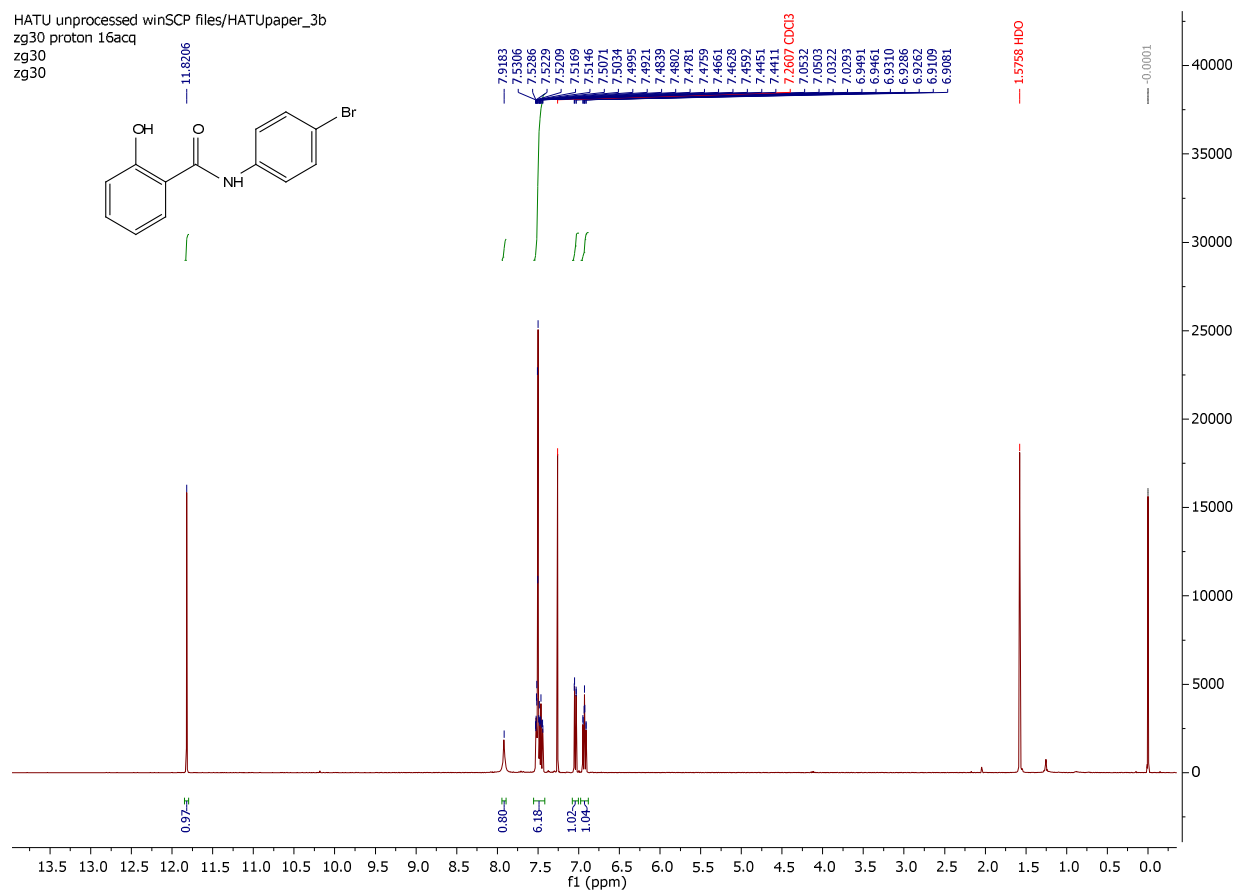

Figure S17. <sup>1</sup>H NMR (400 MHz, CDCl<sub>3</sub>) spectrum of compound 4e.

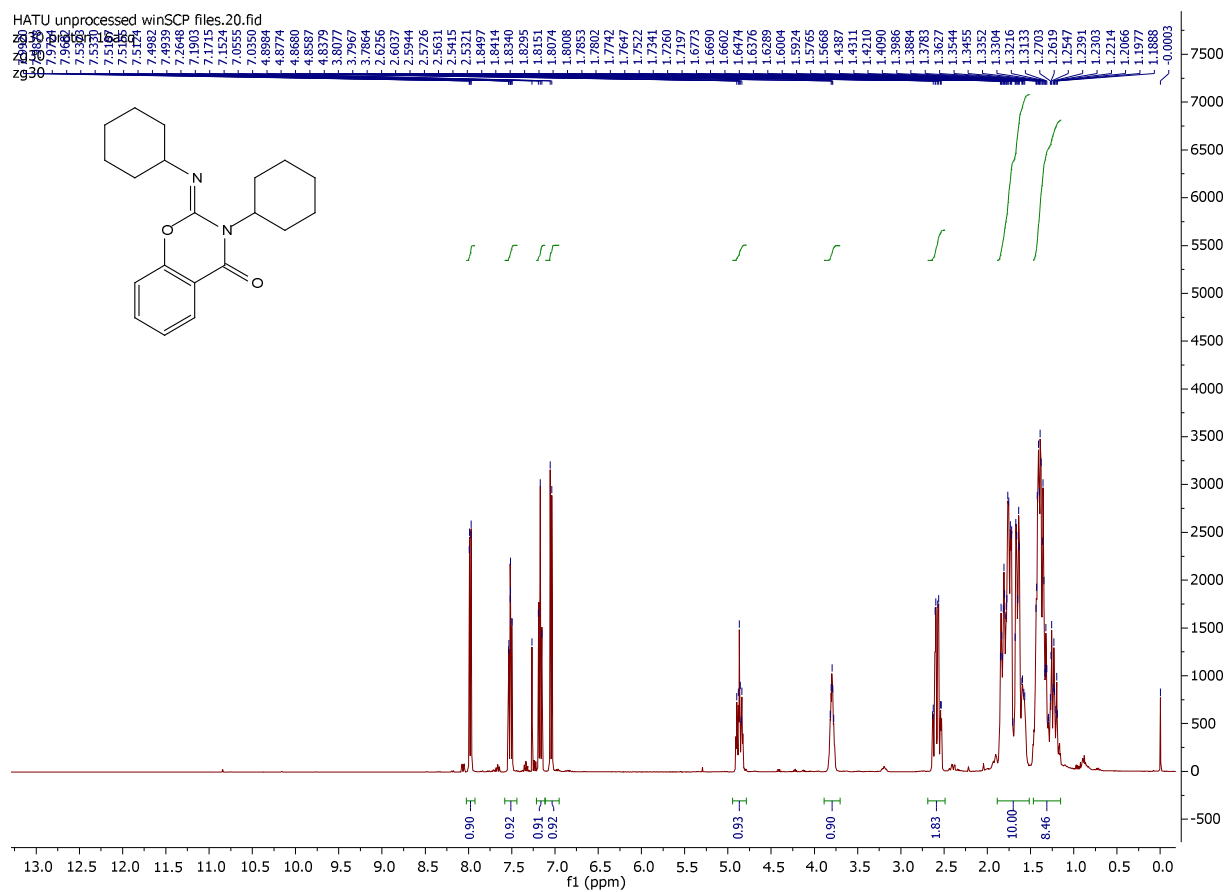

**Figure S18.**  $^{13}\text{C}$  NMR (125 MHz,  $\text{CDCl}_3$ ) spectrum of compound **4e**.

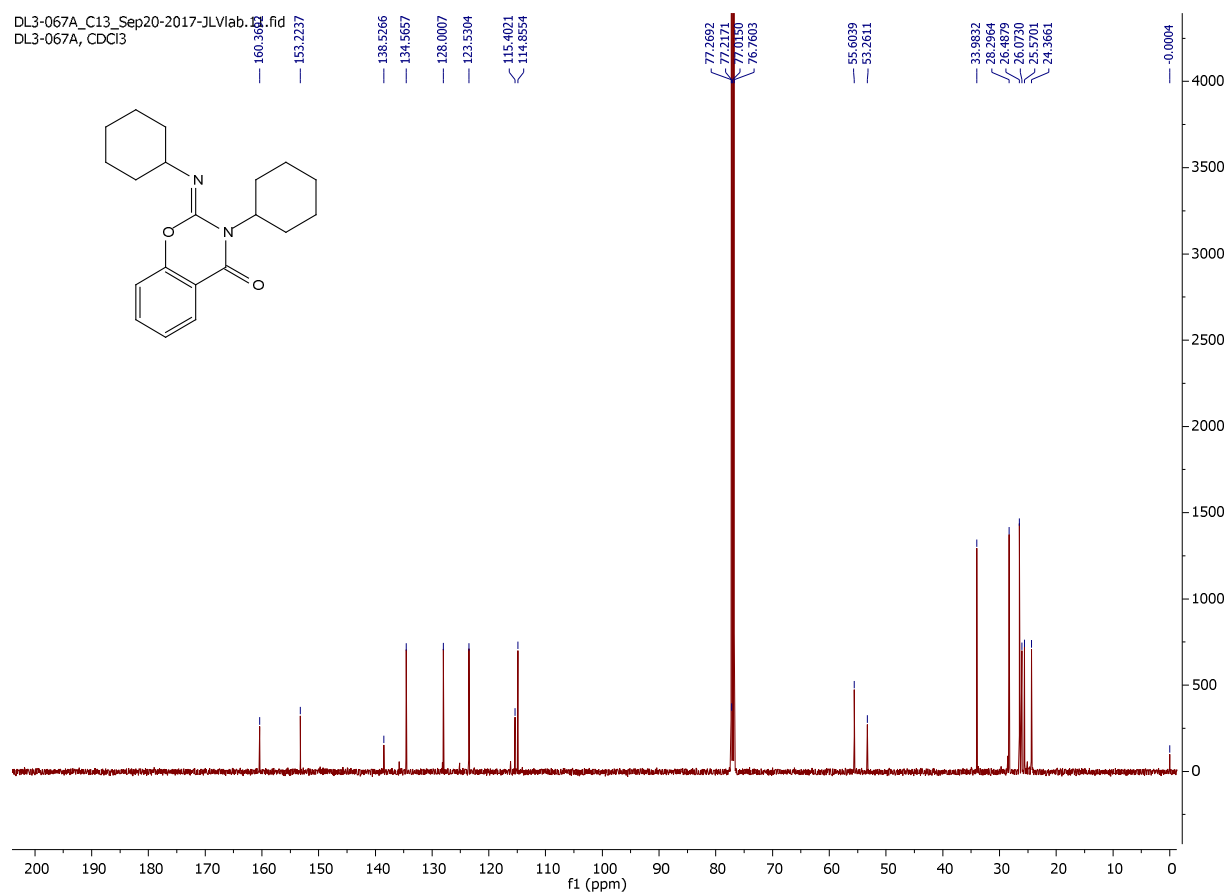



Figure S19. <sup>1</sup>H NMR (400 MHz, CDCl<sub>3</sub>) spectrum of compound 3c.

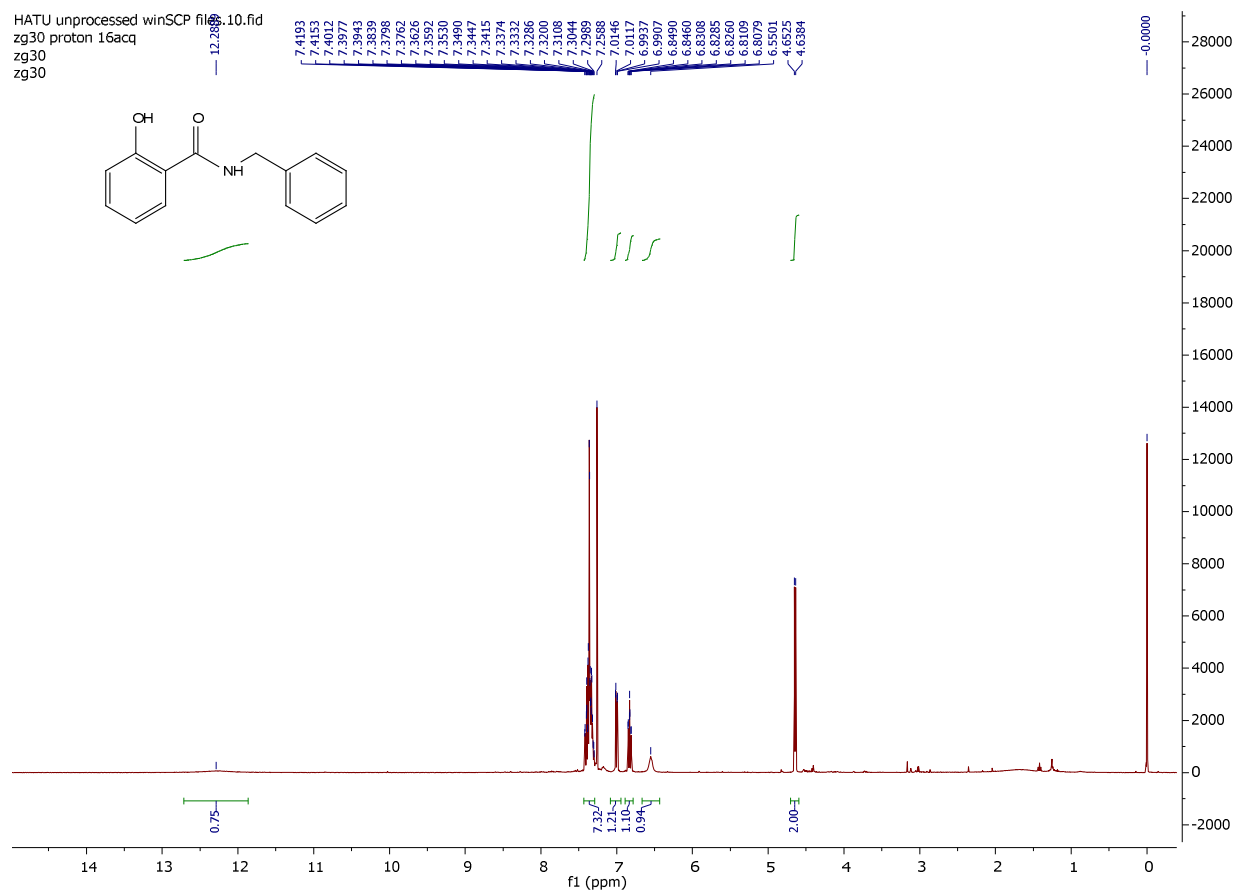

Figure S20. <sup>1</sup>H NMR (600 MHz, CDCl<sub>3</sub>) spectrum of compound 4f.

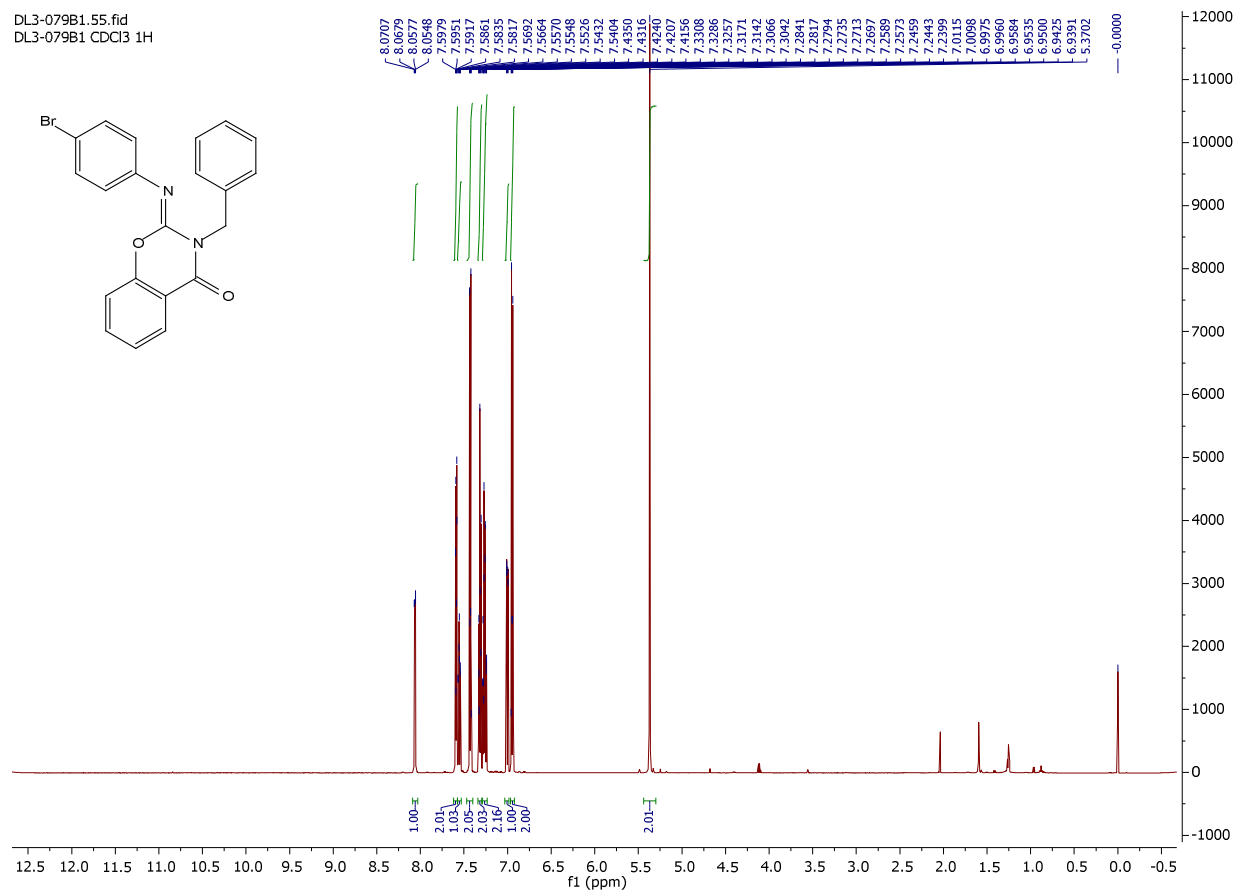

Figure S21.  $^{13}\text{C}$  NMR (150 MHz,  $\text{CDCl}_3$ ) spectrum of compound **4f**.

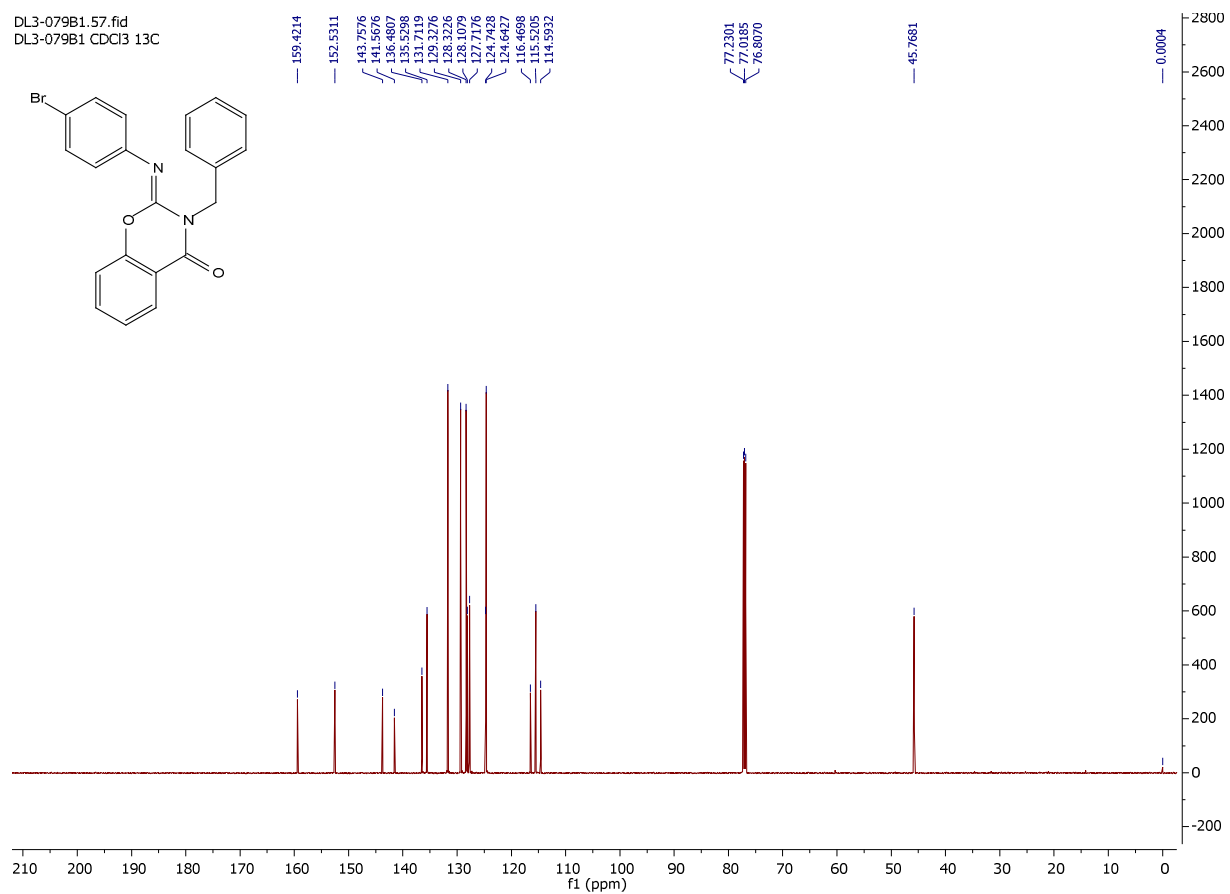

**Figure S22.**  $^1\text{H}$  NMR (500 MHz,  $\text{CDCl}_3$ ) spectrum of compound **4h**.

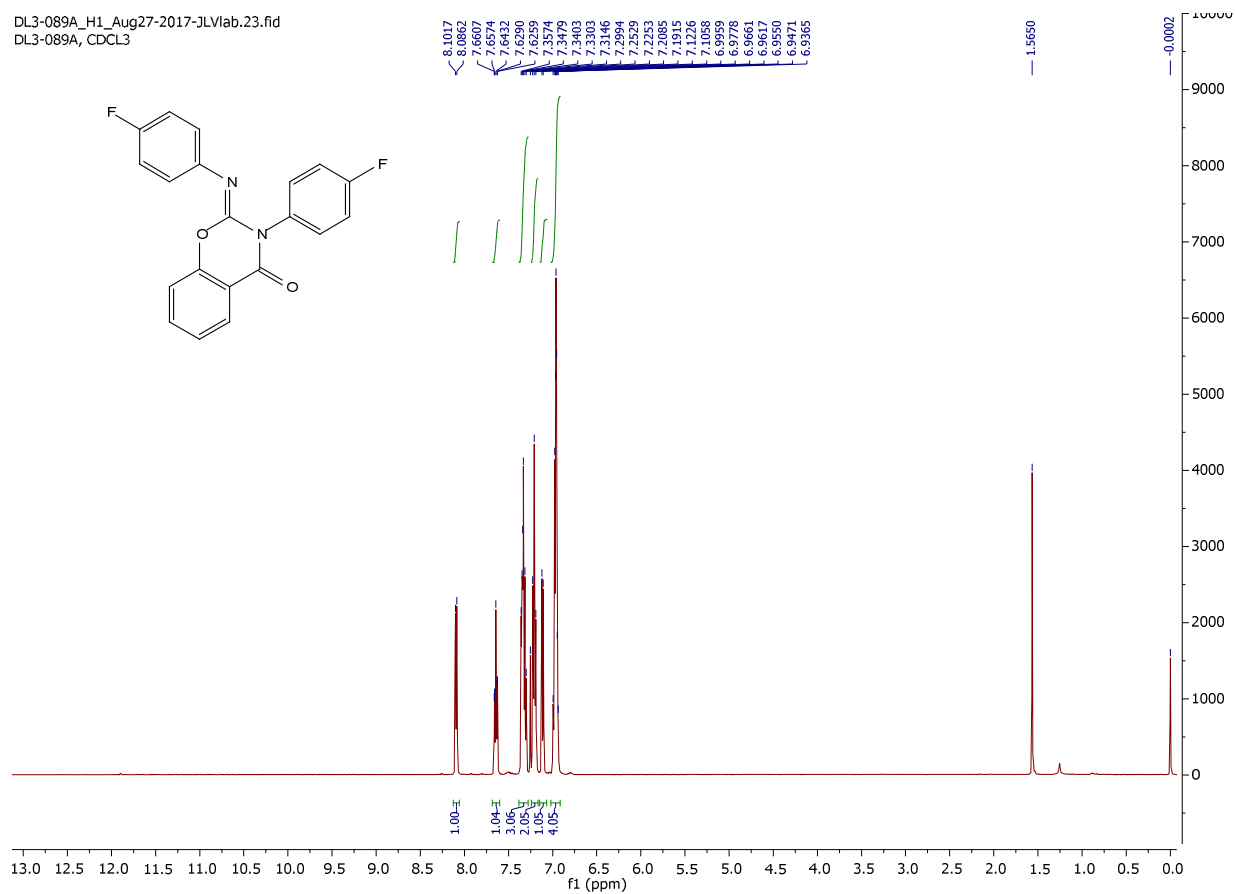

Figure S23.  $^{13}\text{C}$  NMR (125 MHz,  $\text{CDCl}_3$ ) spectrum of compound **4h**.

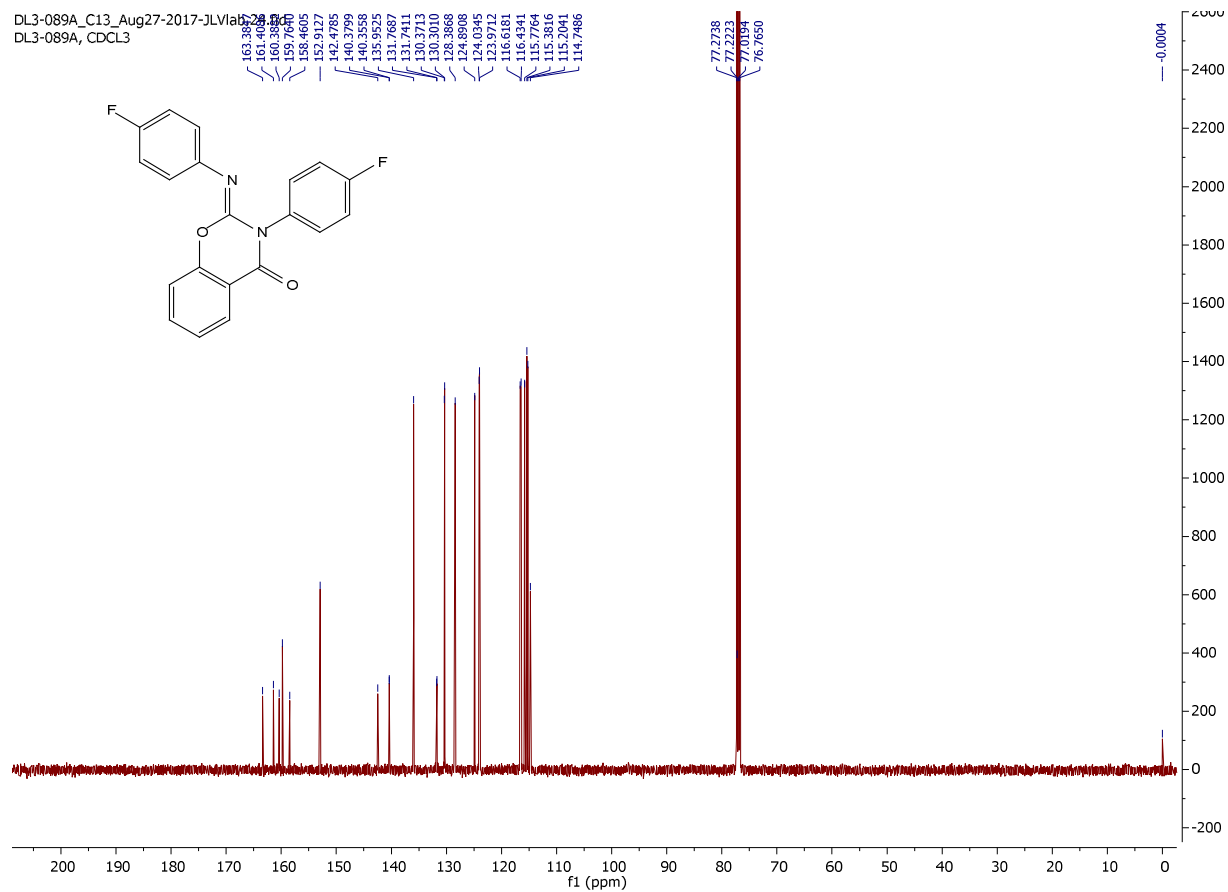

Figure S24. <sup>1</sup>H NMR (500 MHz, CDCl<sub>3</sub>) spectrum of compound 4i.

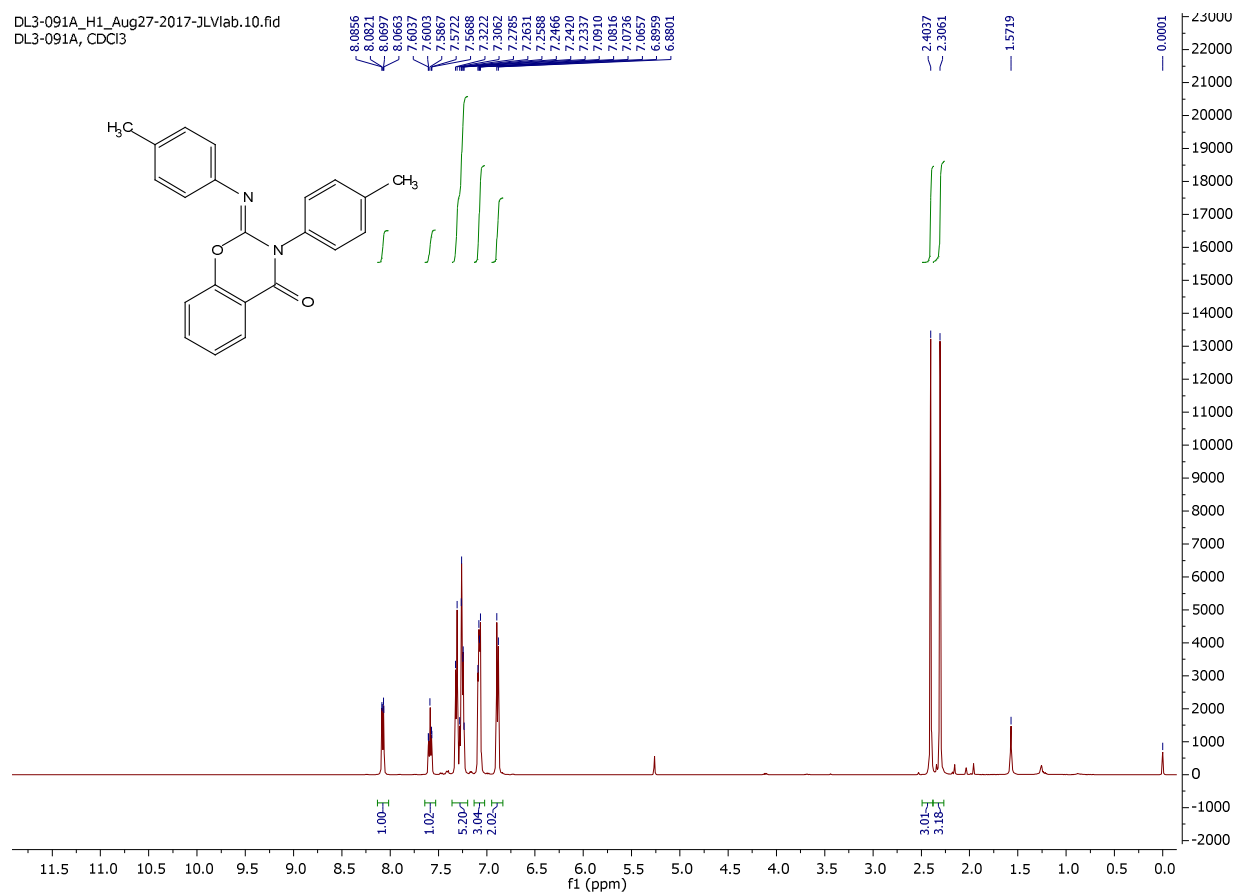

Figure S25.  $^{13}\text{C}$  NMR (125 MHz,  $\text{CDCl}_3$ ) spectrum of compound 4i.

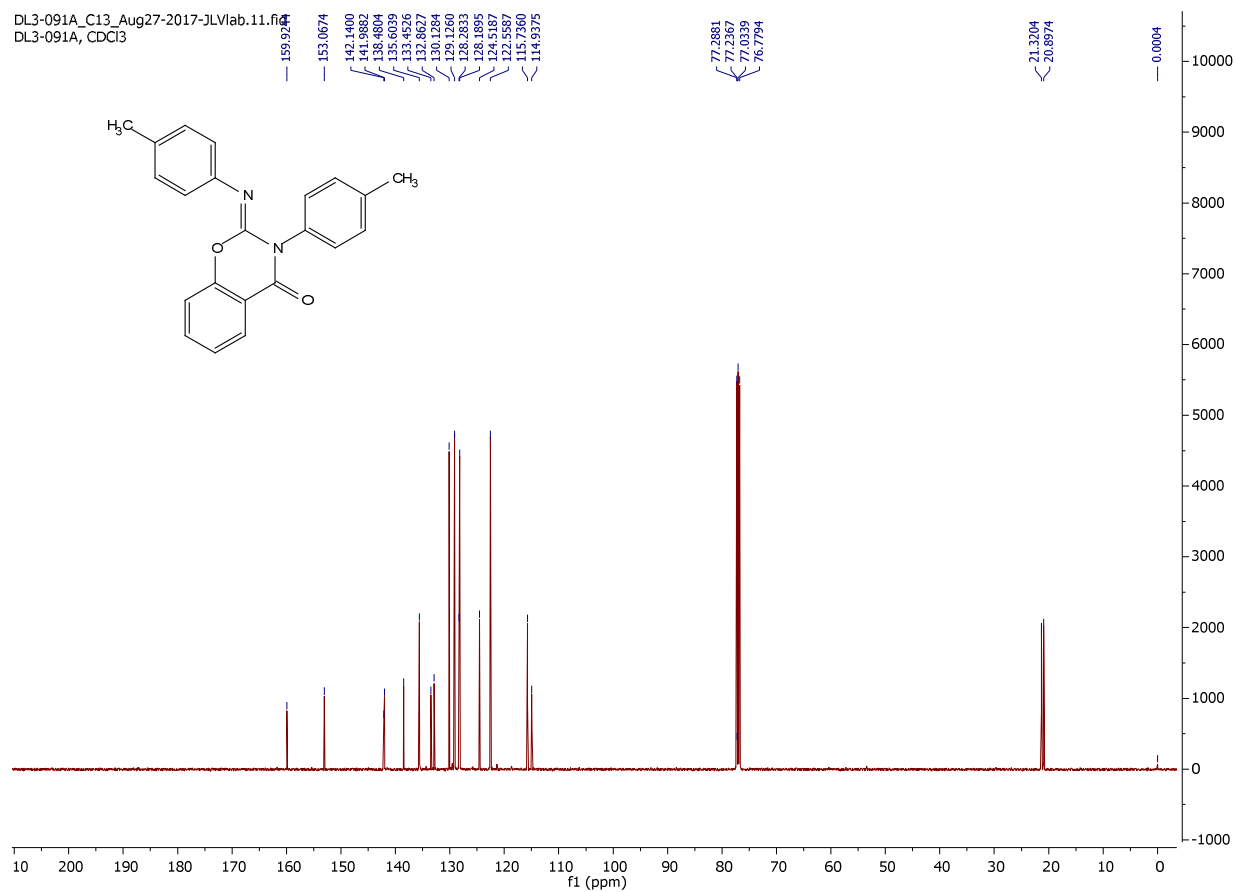

Figure S26.  $^1\text{H}$  NMR (500 MHz,  $\text{CDCl}_3$ ) spectrum of compound 41.

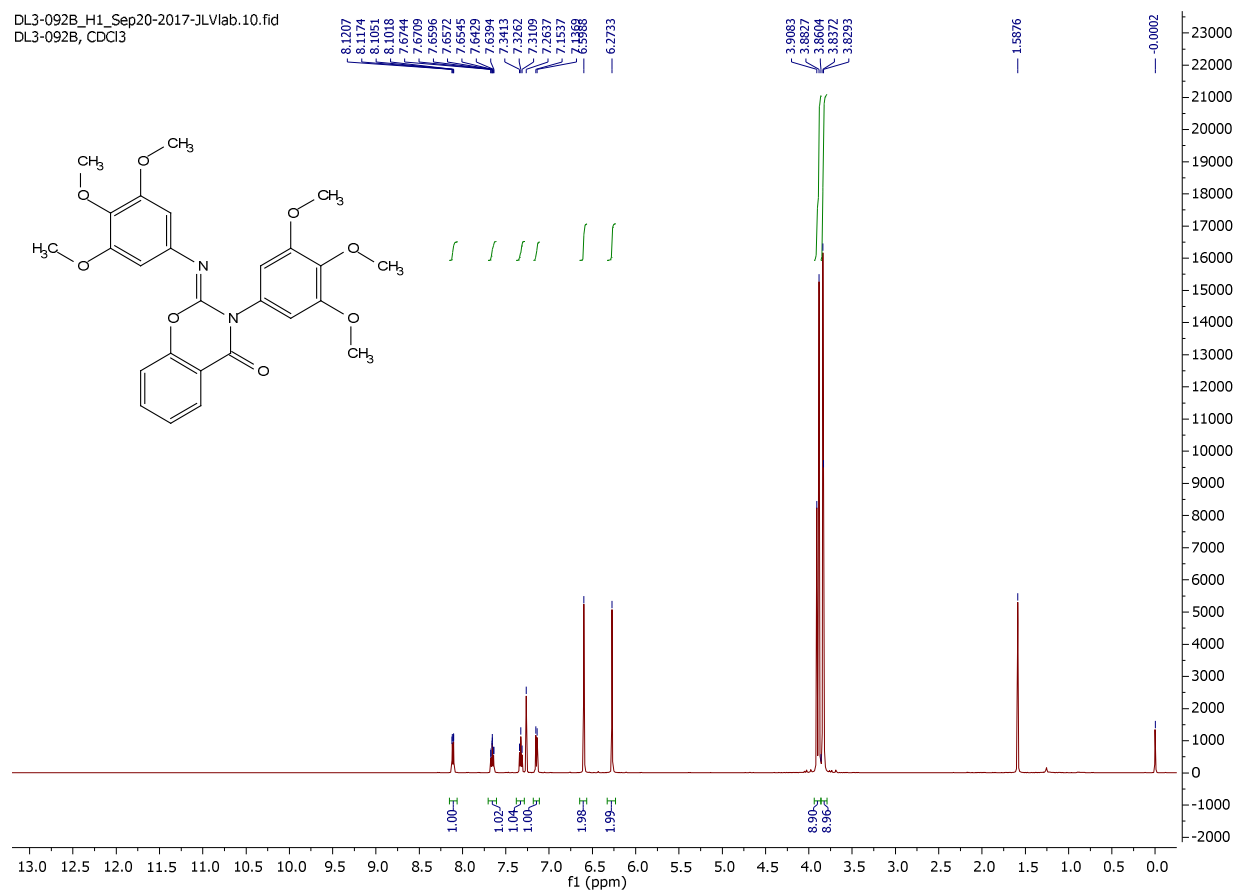



Figure S27.  $^{13}\text{C}$  NMR (125 MHz,  $\text{CDCl}_3$ ) spectrum of compound **4I**.

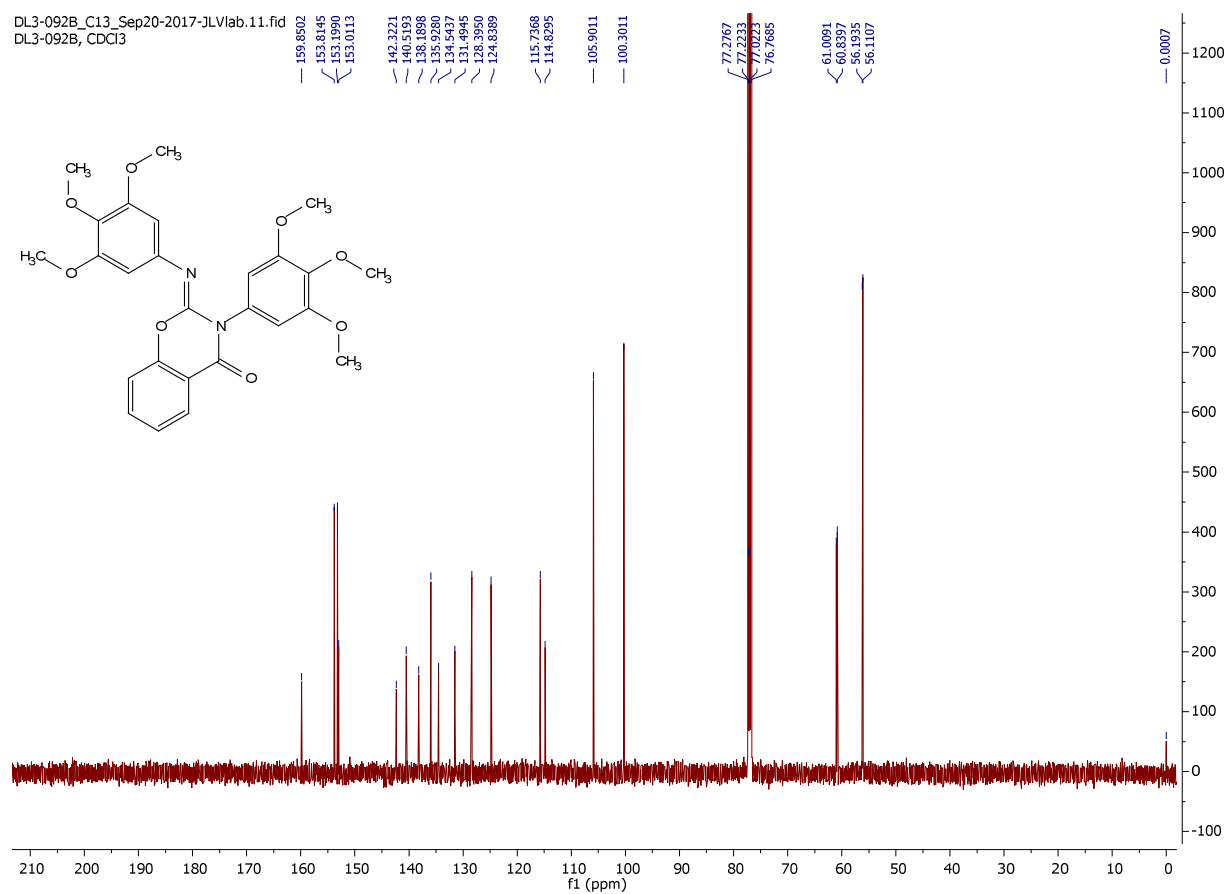

**Figure S28.**  $^1\text{H}$  NMR (500 MHz,  $\text{CDCl}_3$ ) spectrum of compound **4m**.

DL3-092A\_H1\_Sep20-2017-JLVlab.10.fid  
DL3-092A,  $\text{CDCl}_3$

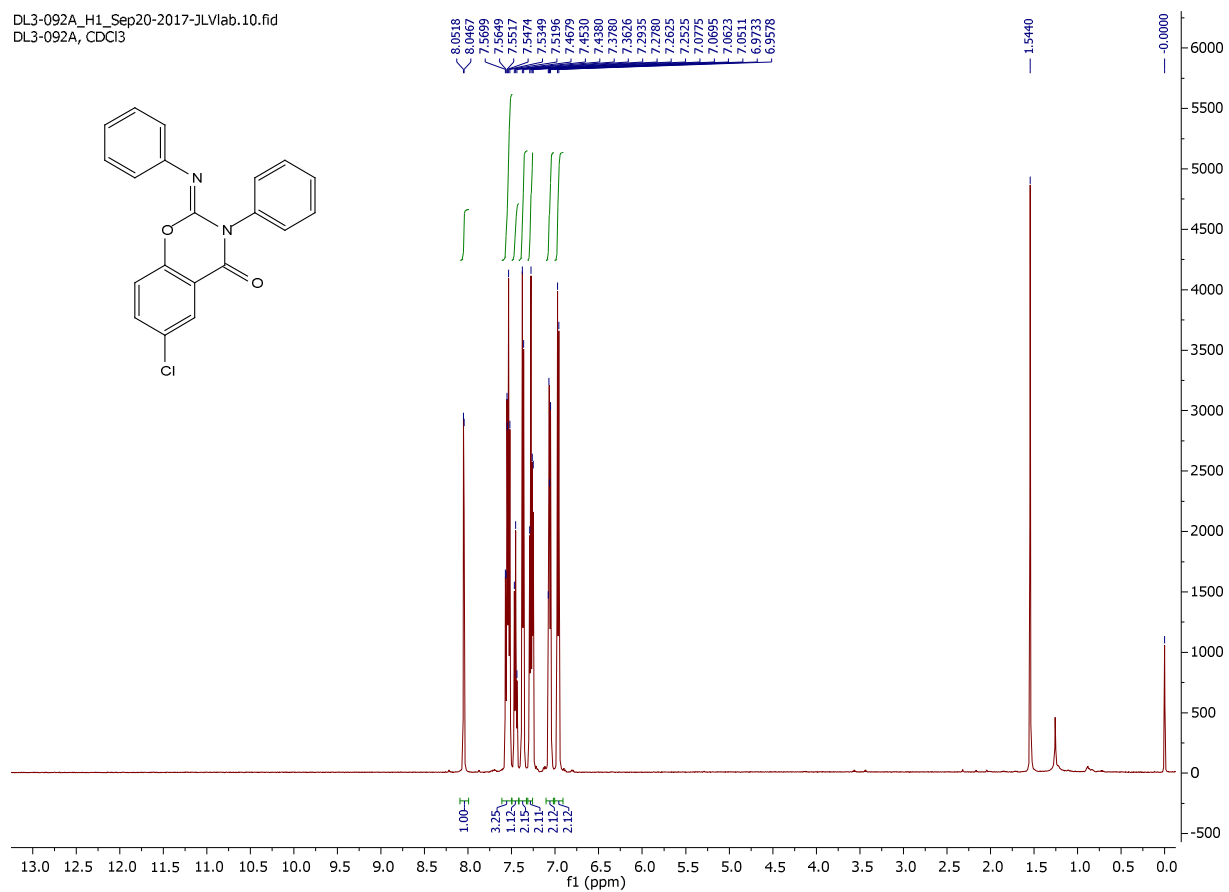

Figure S29.  $^{13}\text{C}$  NMR (125 MHz,  $\text{CDCl}_3$ ) spectrum of compound **4m**.

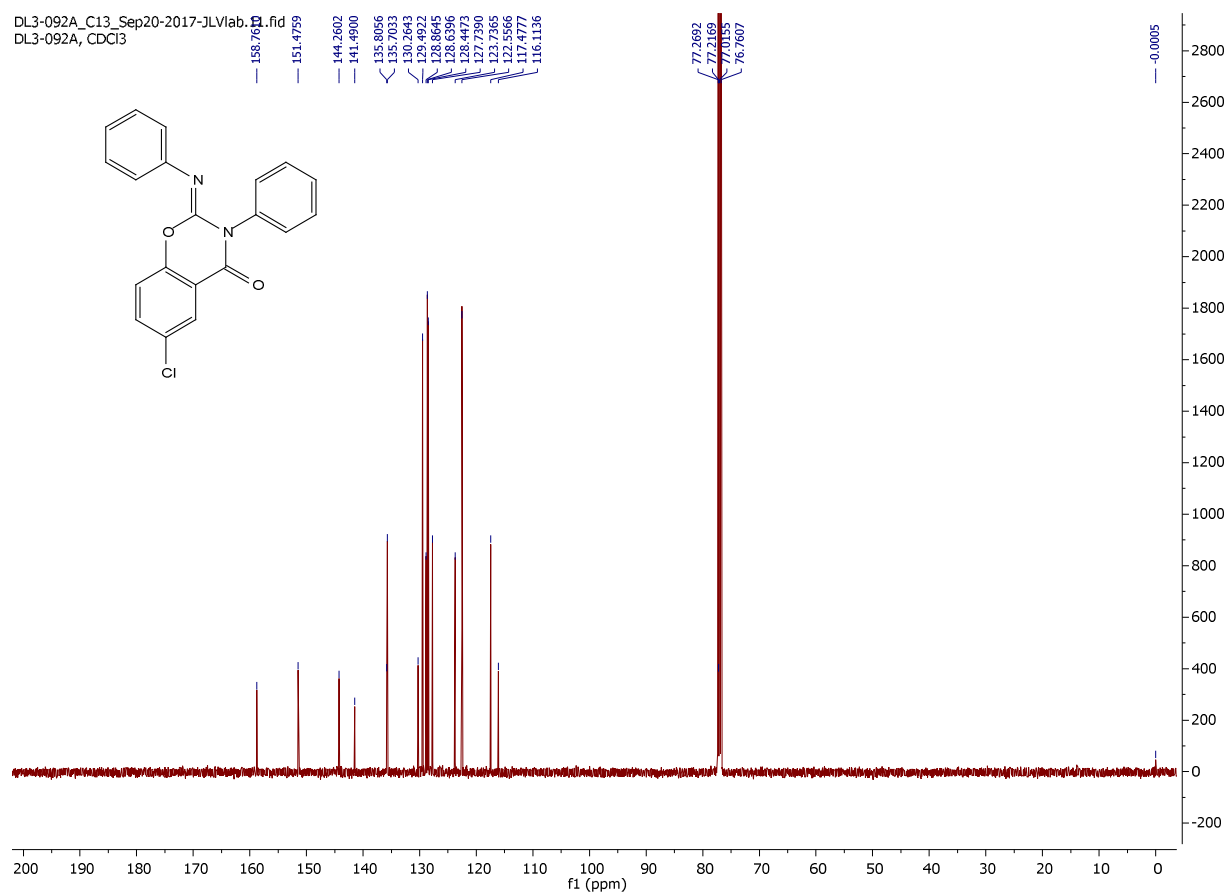

**Figure S30.**  $^1\text{H}$  NMR (500 MHz,  $\text{CDCl}_3$ ) spectrum of compound **4n**.

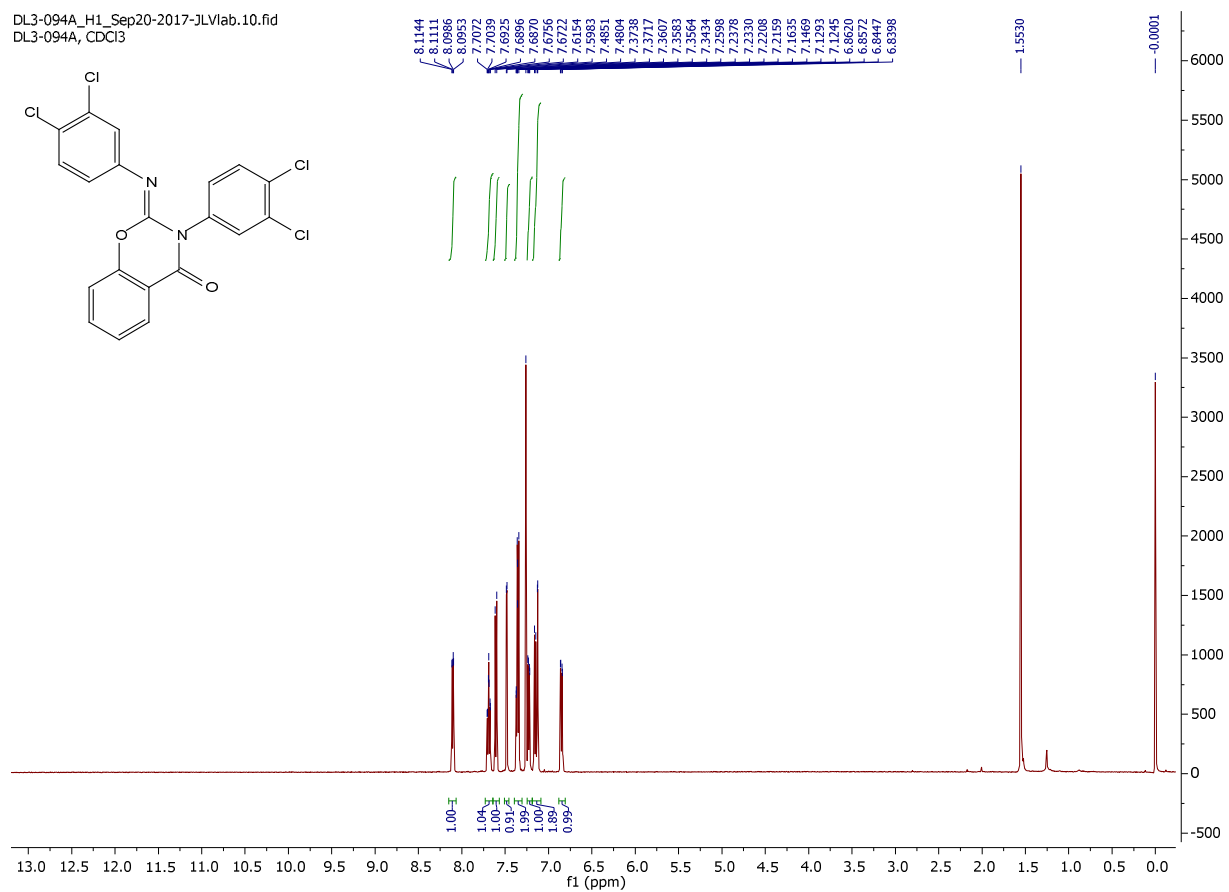

Figure S31.  $^{13}\text{C}$  NMR (125 MHz,  $\text{CDCl}_3$ ) spectrum of compound **4n**.

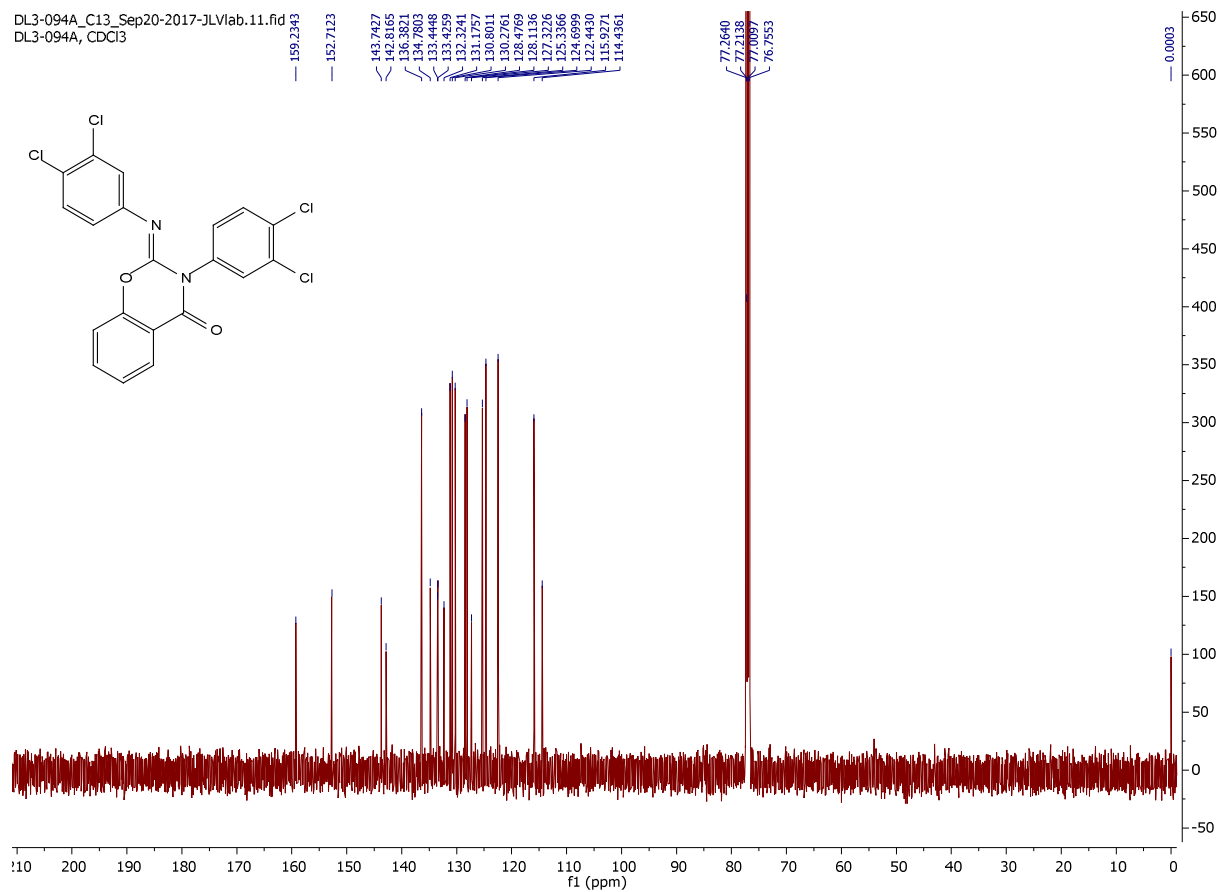

Figure S32. <sup>1</sup>H NMR (600 MHz, DMSO-*d*<sub>6</sub>) spectrum of compound **4o**.

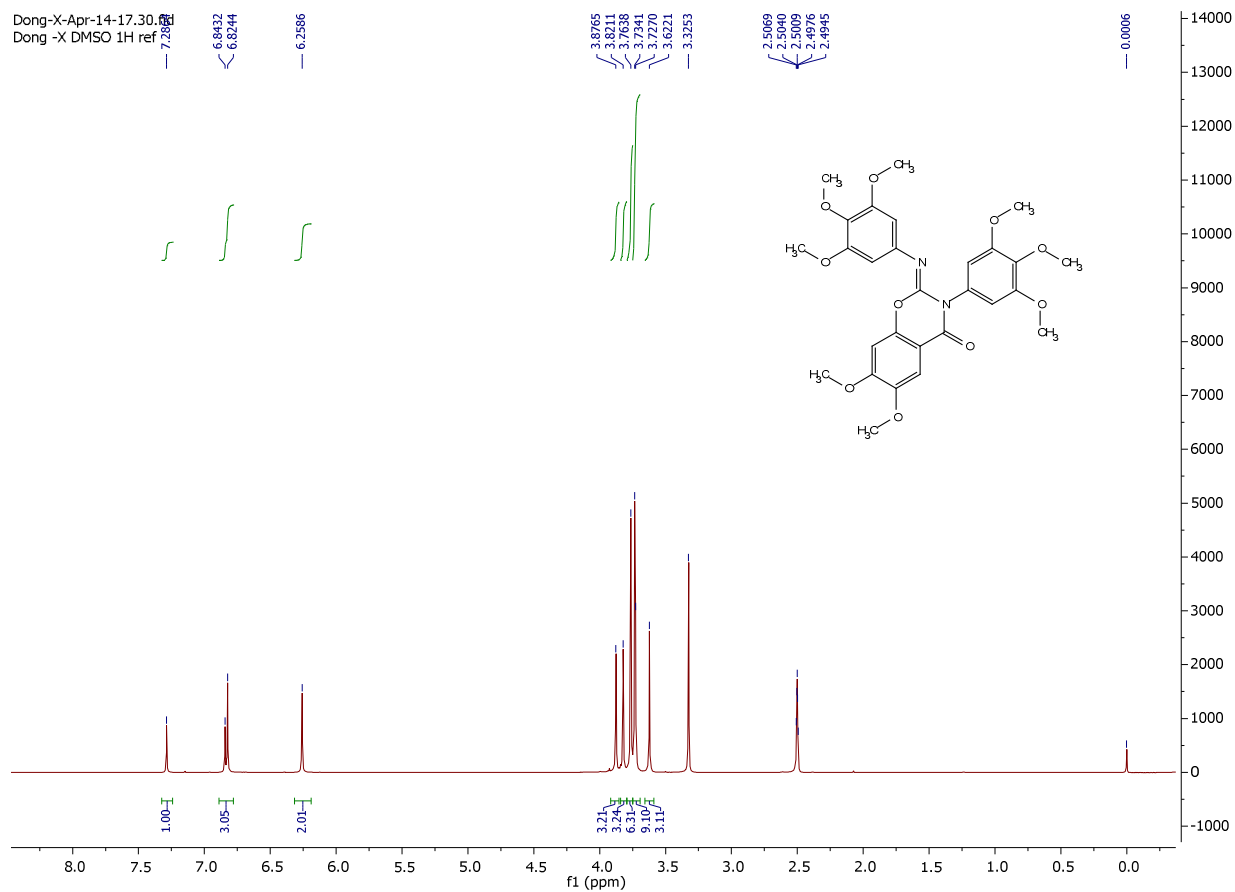

**Figure S33.**  $^{13}\text{C}$  NMR (150 MHz,  $\text{DMSO-}d_6$ ) spectrum of compound **40**.

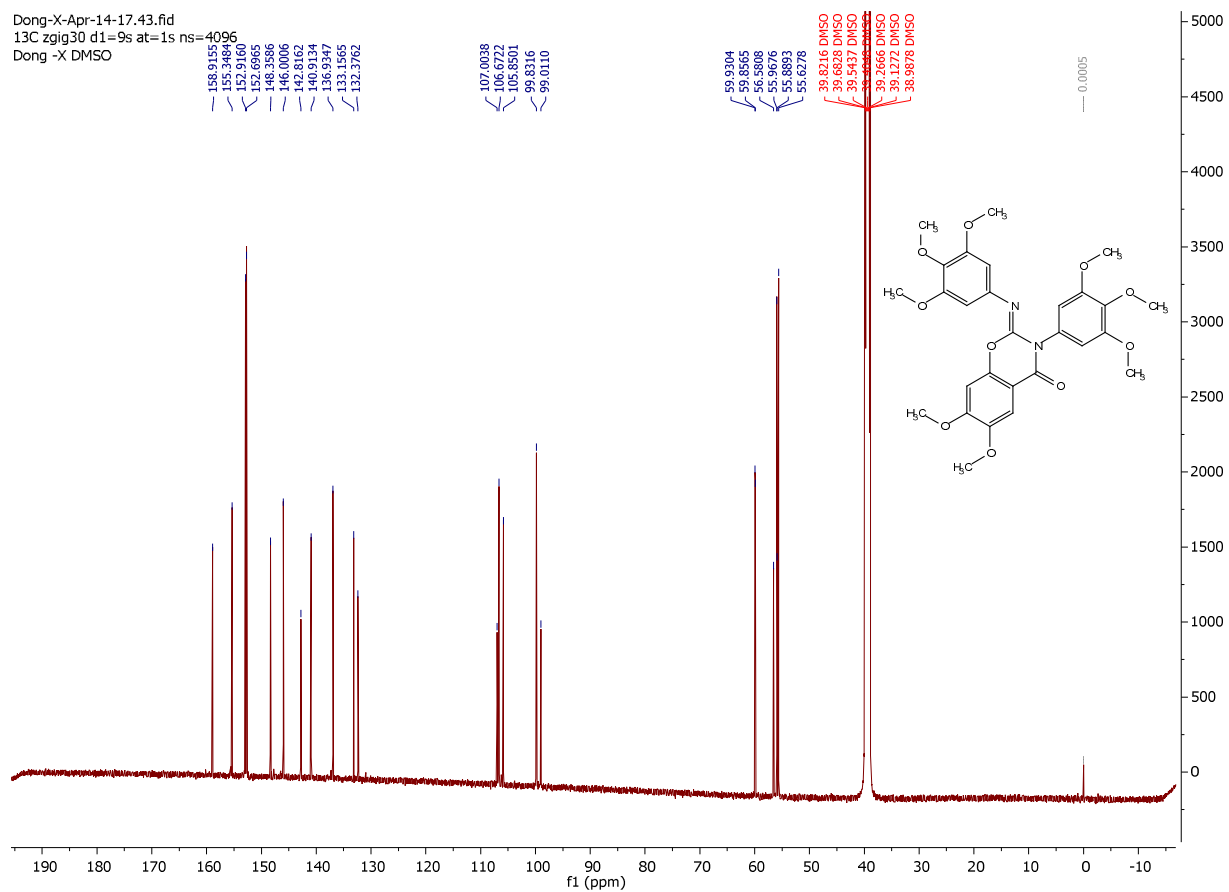





Figure S36. TOCSY expansion spectra 1 of compound 4c.

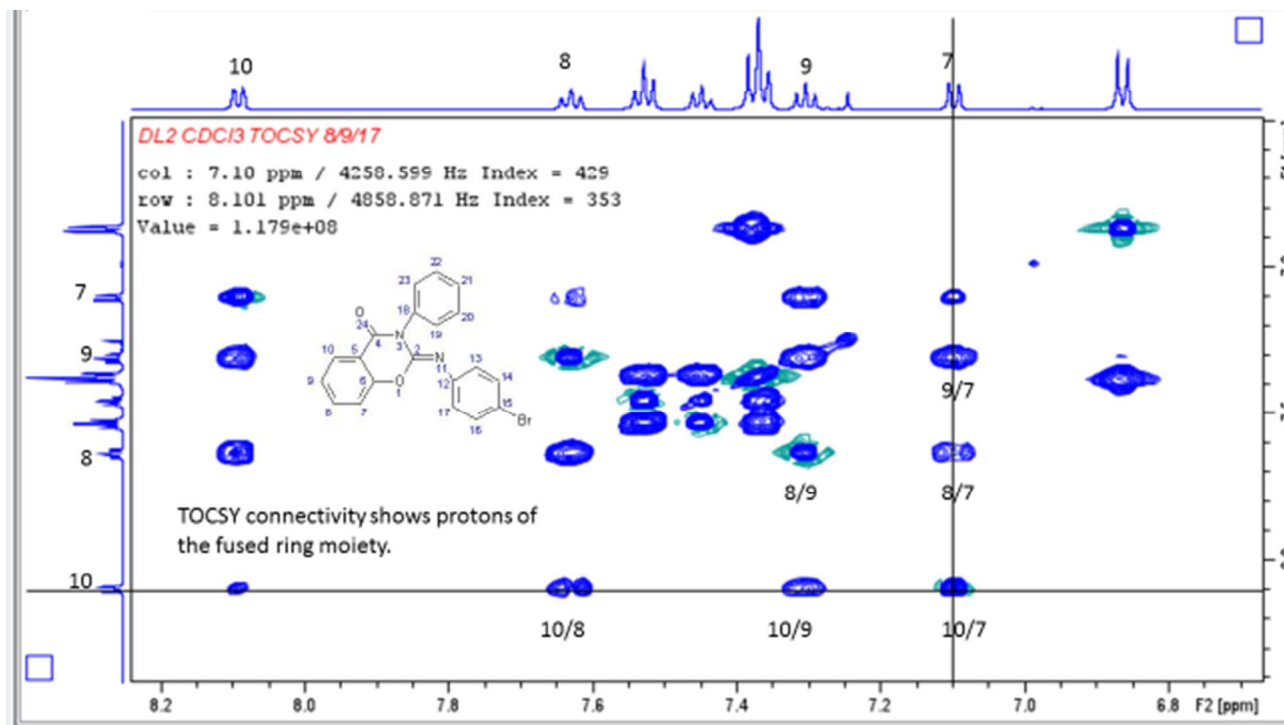

Figure S37. <sup>13</sup>C-HSQC expansion spectra 1 of 4c.

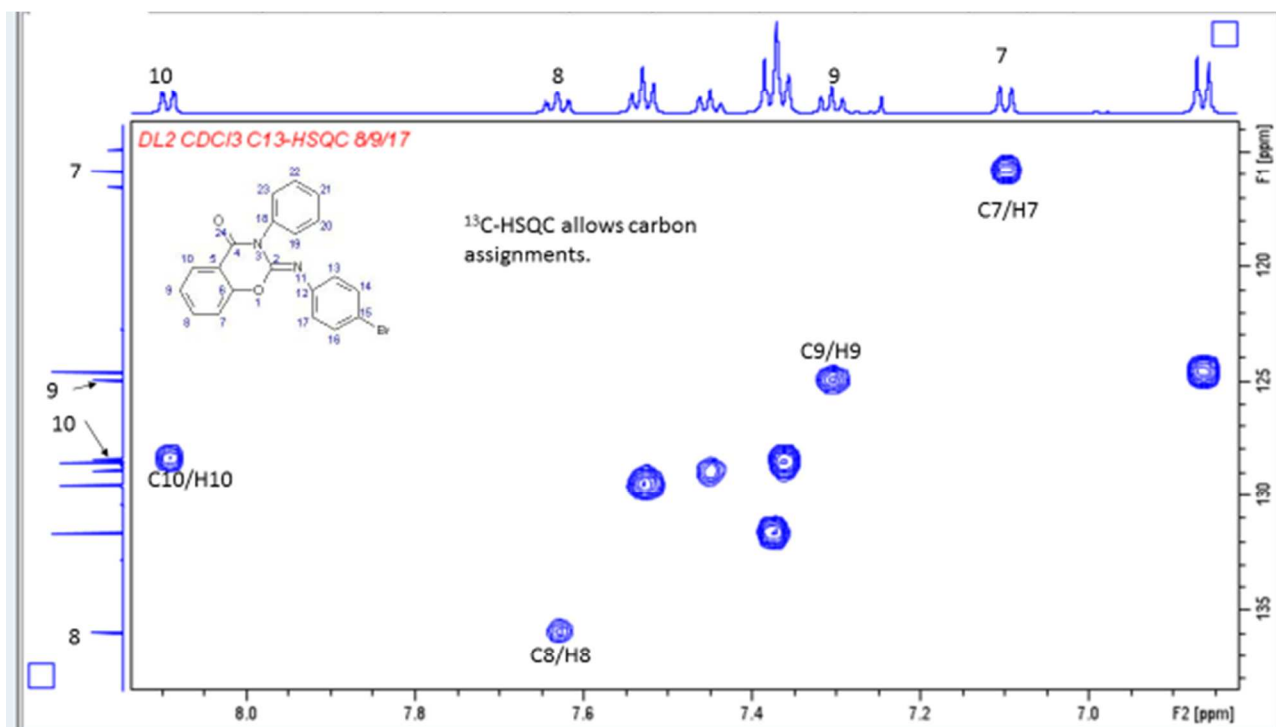

Figure S38.  $^{13}\text{C}$  NMR spectra expansion of compound 4c.

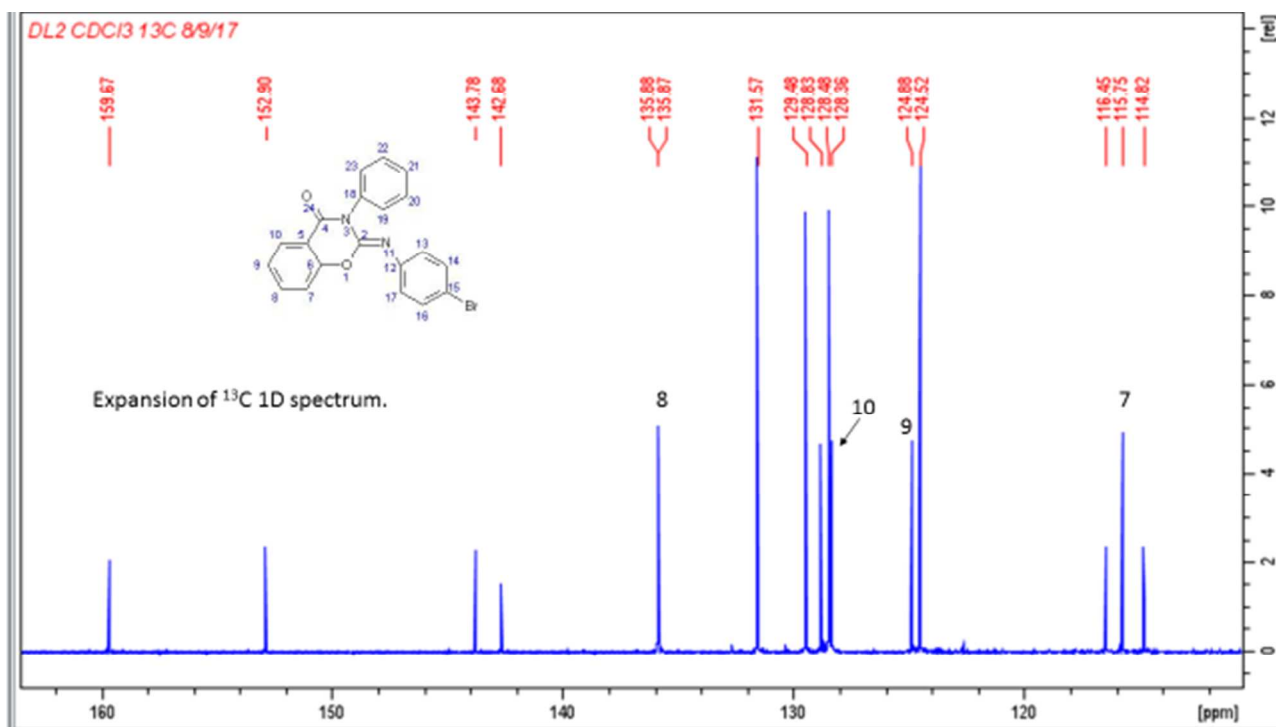

Figure S39. TOCSY expansion spectra 2 of compound 4c.

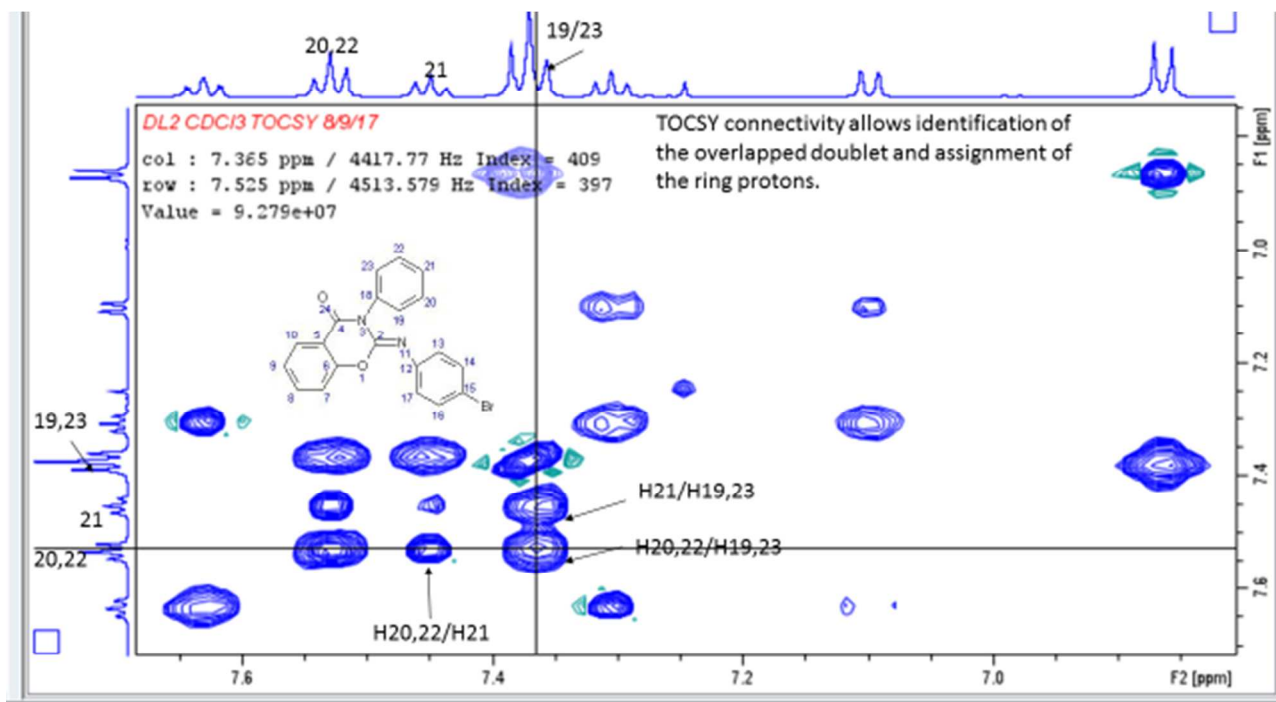

Figure S40.  $^{13}\text{C}$ -HSQC expansion spectra 2 of **4c**.

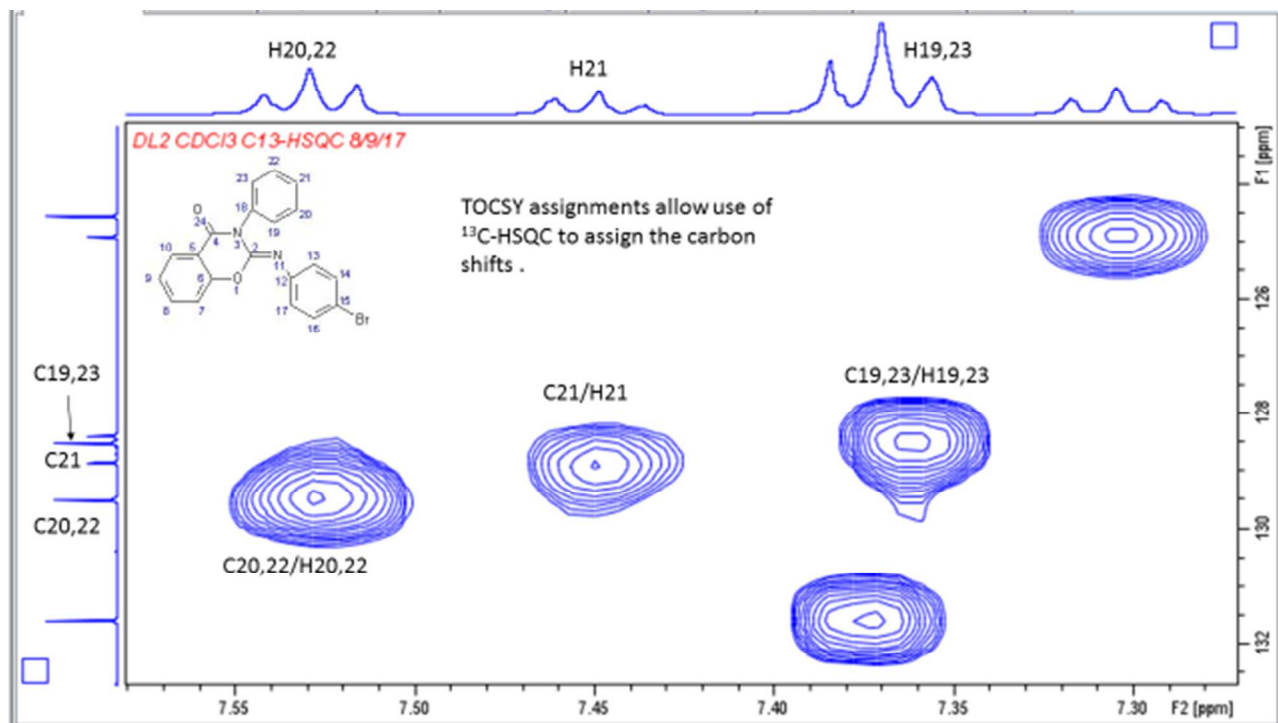

Figure S41. TOCSY expansion spectra 3 of compound **4c**.

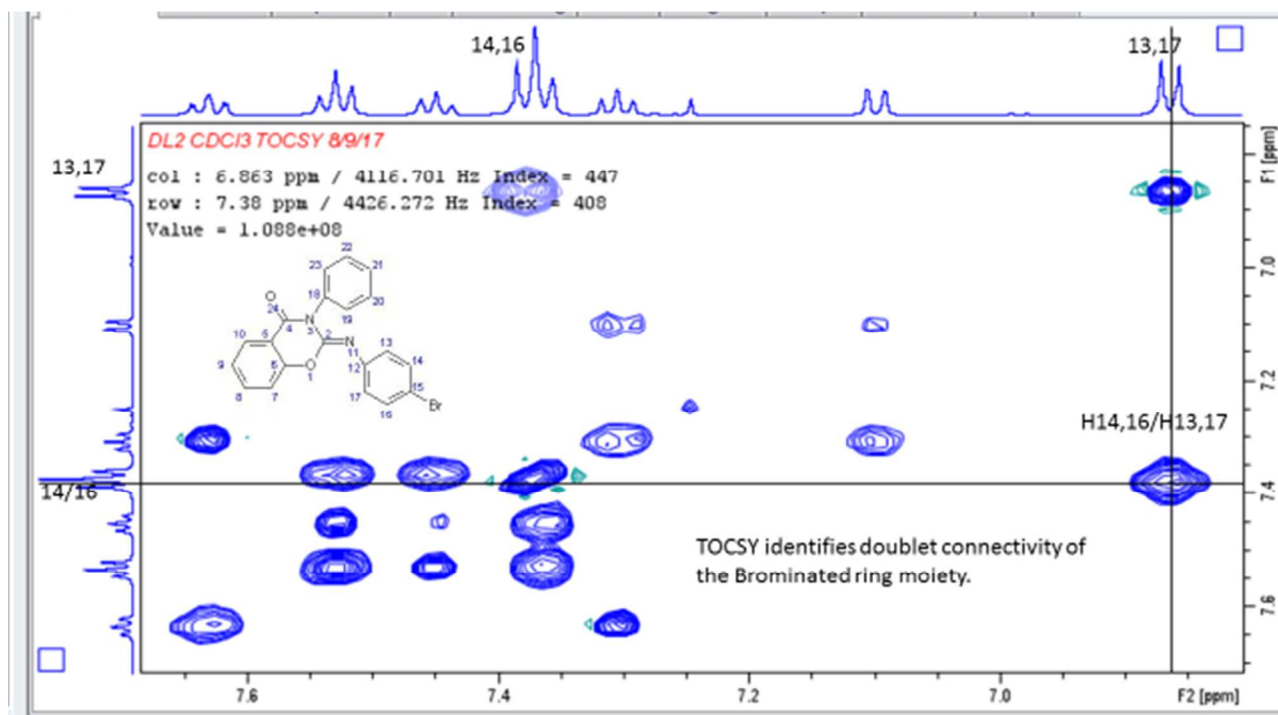

Figure S42.  $^{15}\text{N}$ -HMBC expansion spectra of **4c**.

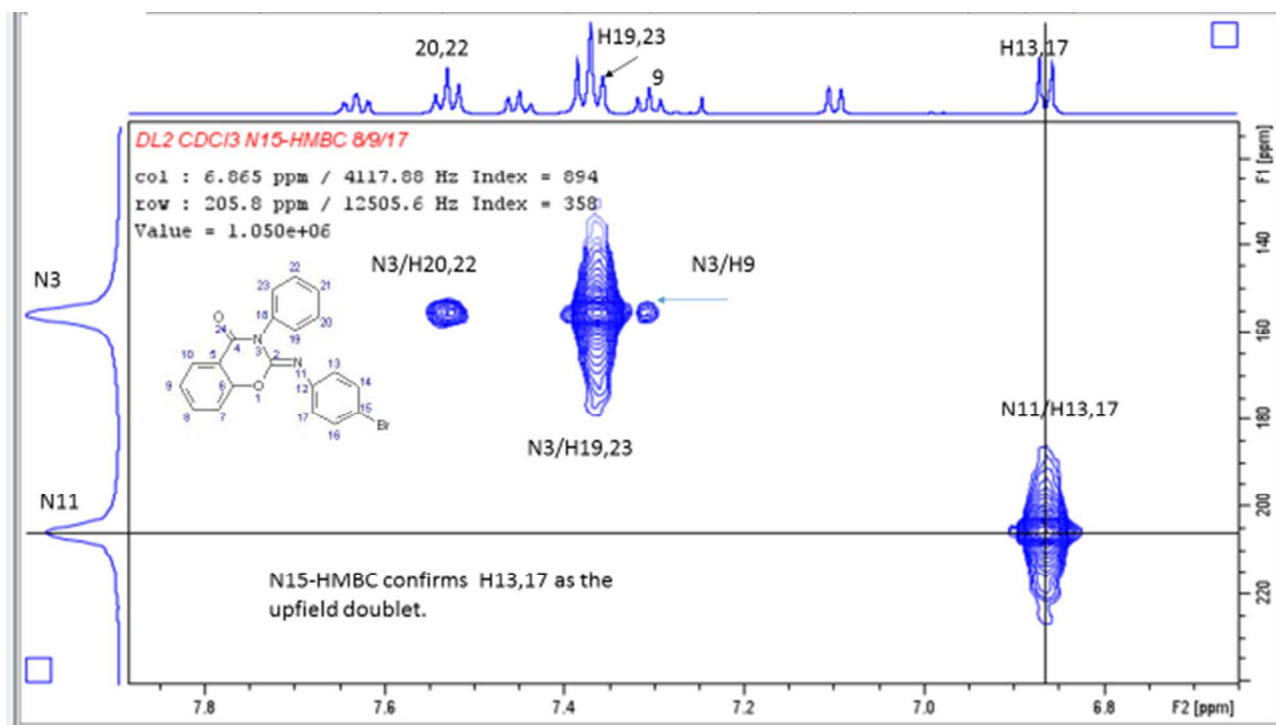

Figure S43.  $^{13}\text{C}$ -HSQC spectra of compound **4c**.

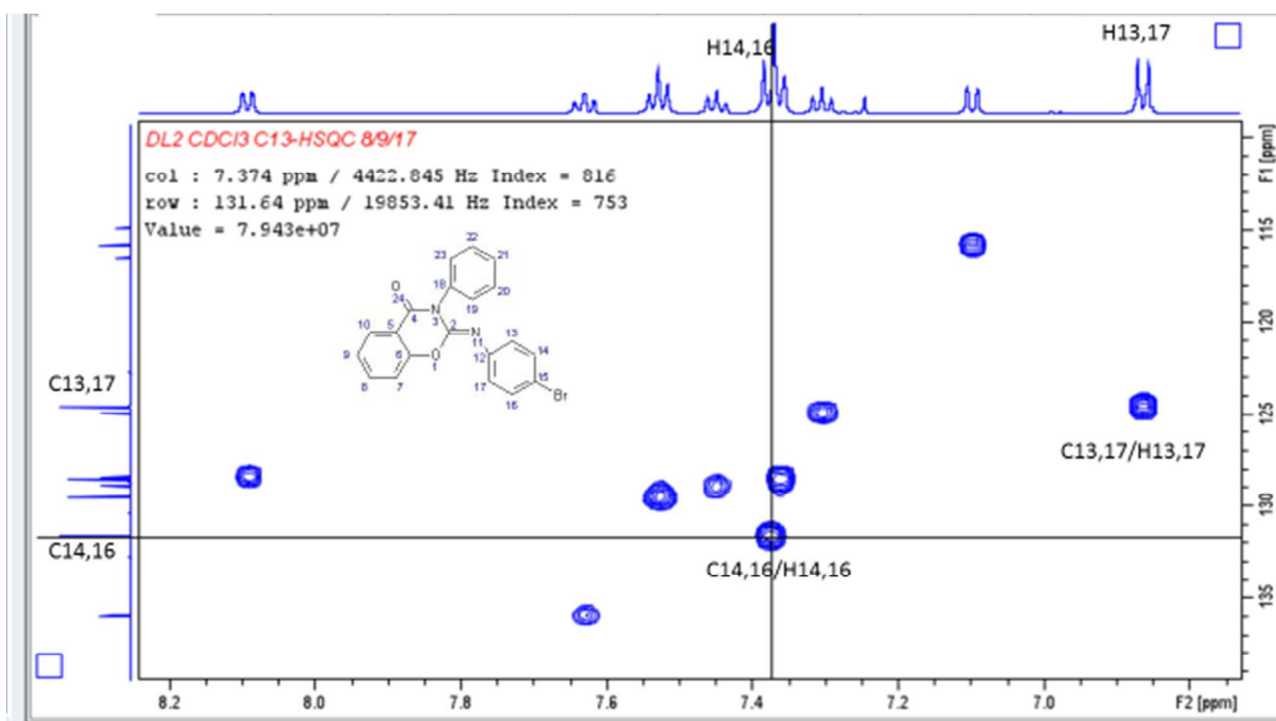

Figure S44.  $^{13}\text{C}$ -HMBC spectra of compound **4c**.

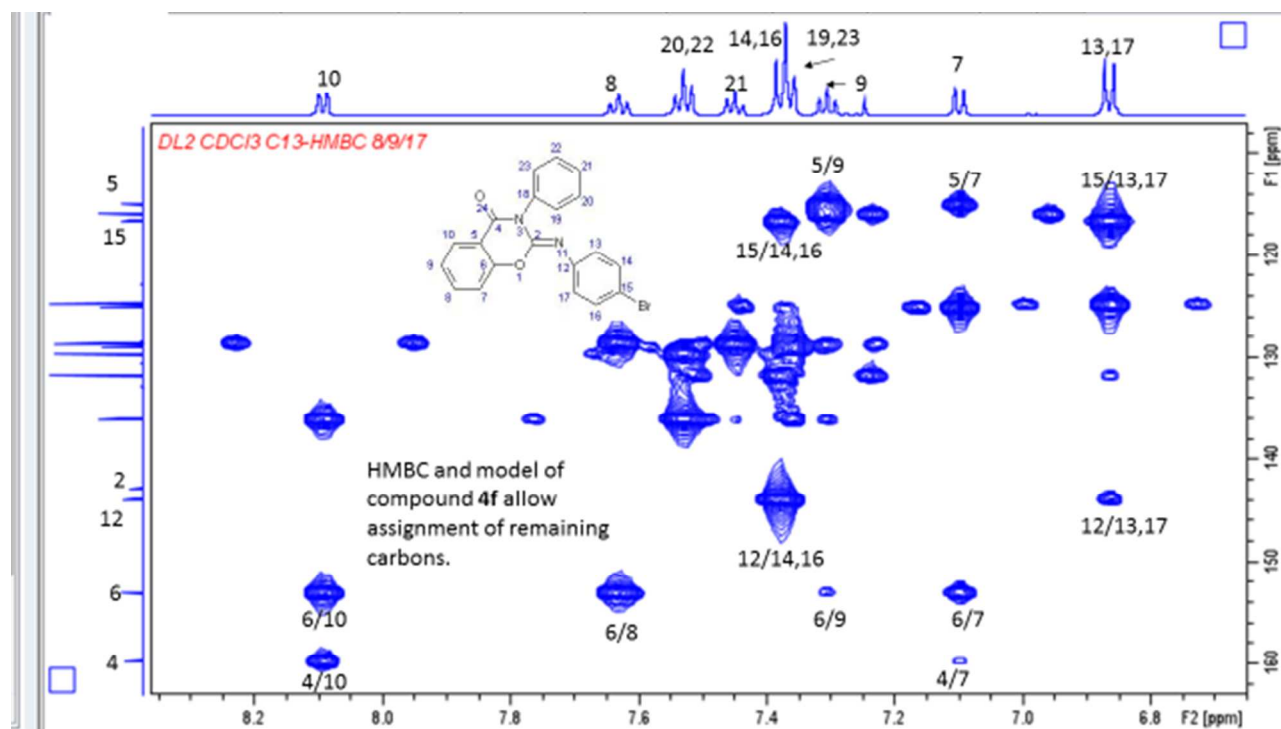

Figure S45. 2D NMR spectra atom numbering for **4d**.

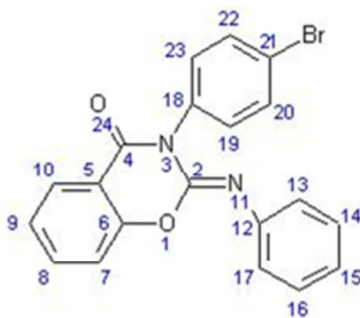

**4d**

Figure S46.  $^1\text{H}$  NMR expansion spectra of compound **4d**.

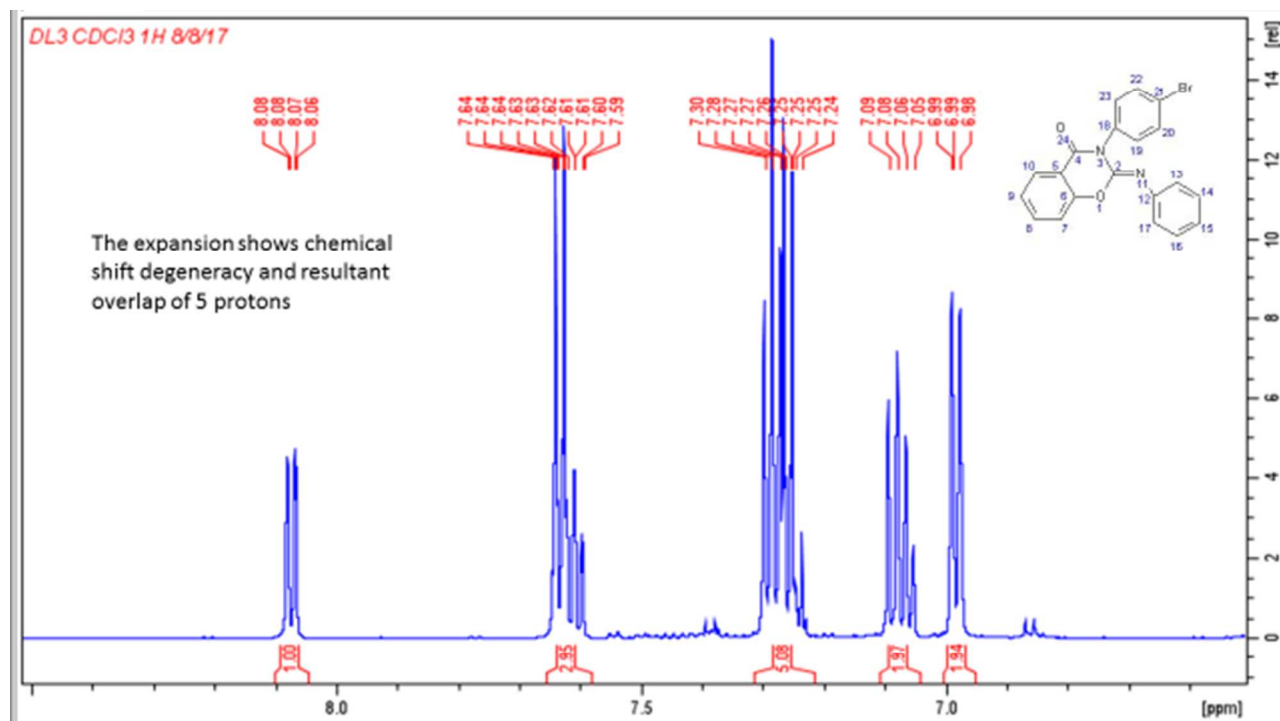

Figure S47. TOCSY expansion spectra 1 of compound **4d**.

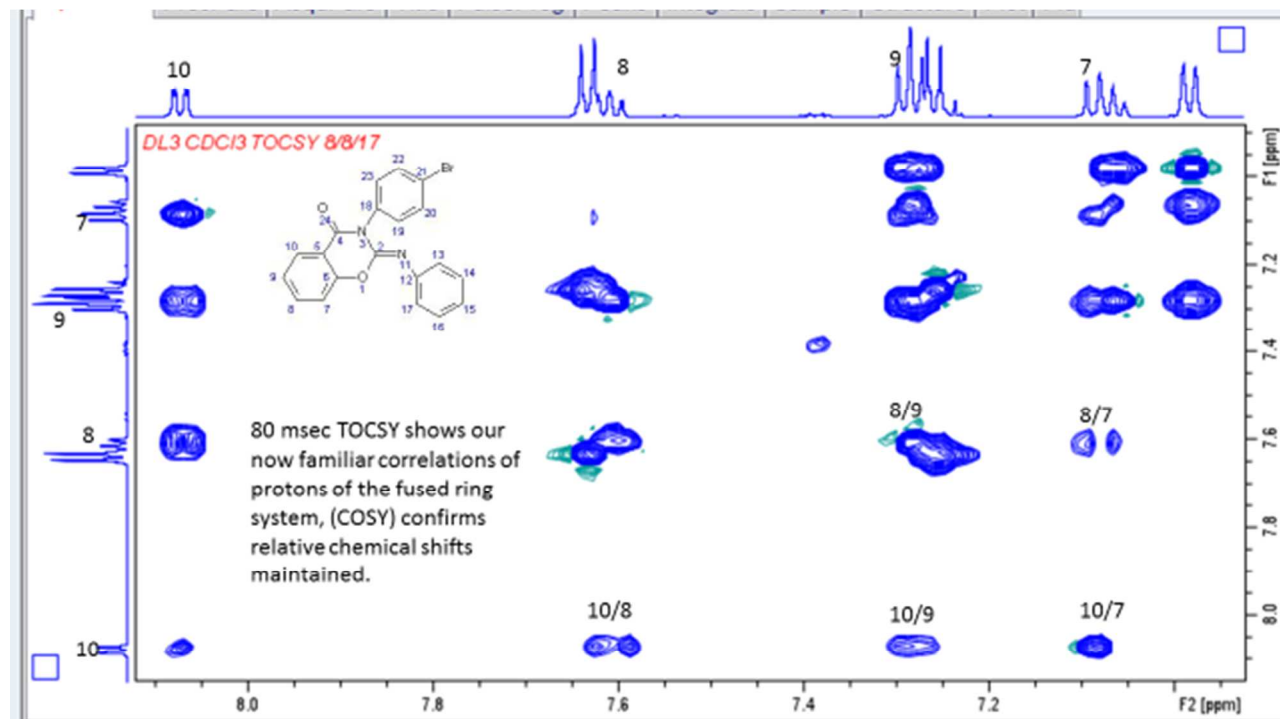

Figure S48.  $^{13}\text{C}$ -HSQC expansion spectra 1 of compound **4d**.

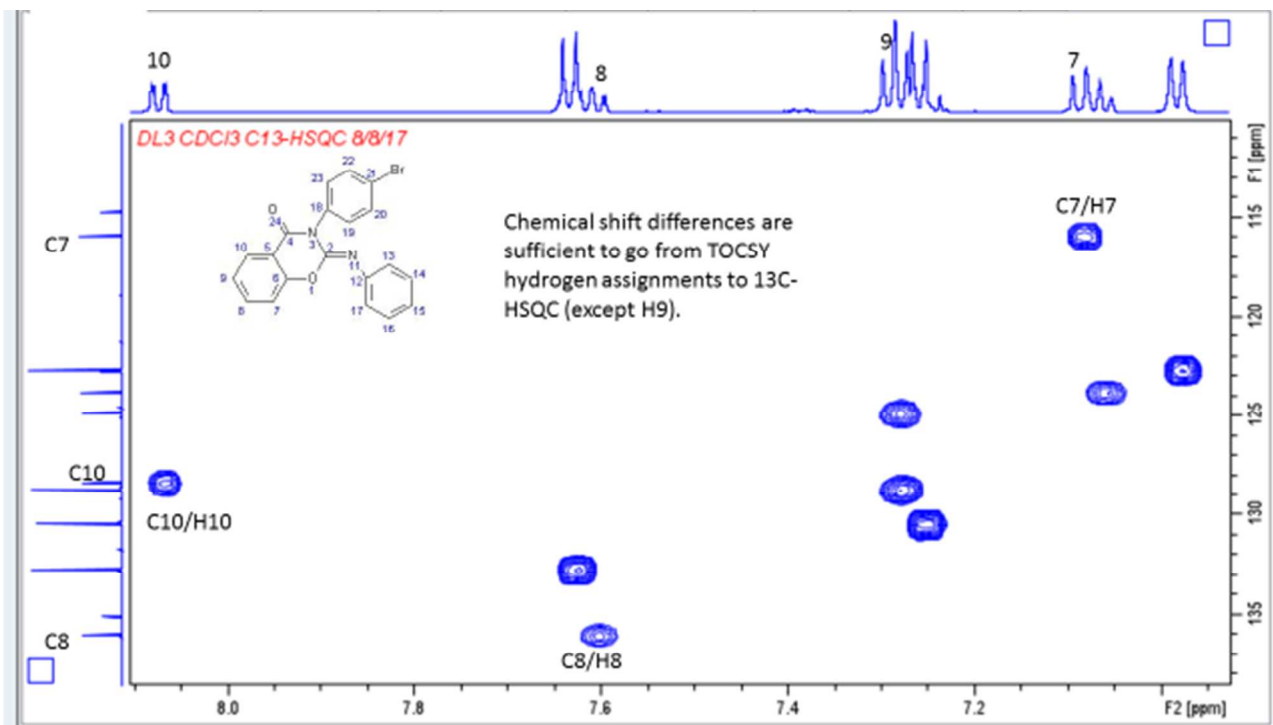

Figure S49.  $^{13}\text{C}$ -HSQC with  $^{13}\text{C}$ -HMBC overlay spectra of compound **4d**.

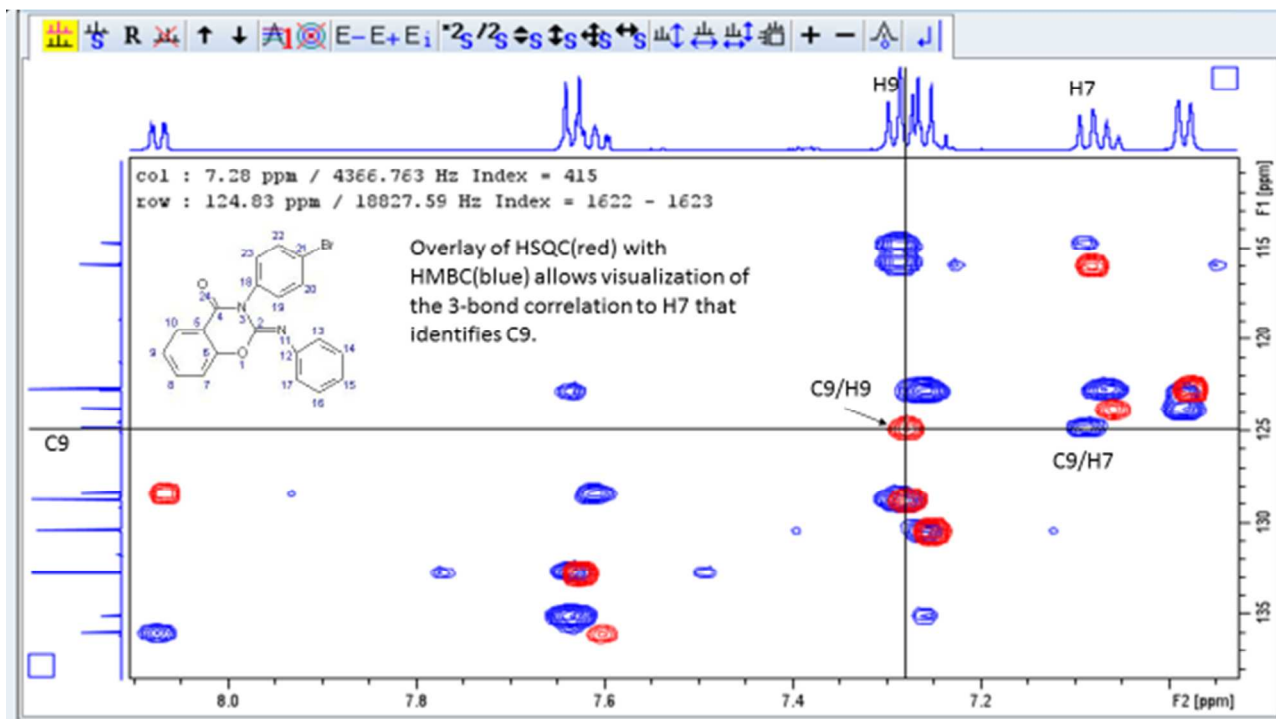



Figure S50. TOCSY expansion spectra 2 of compound 4d.

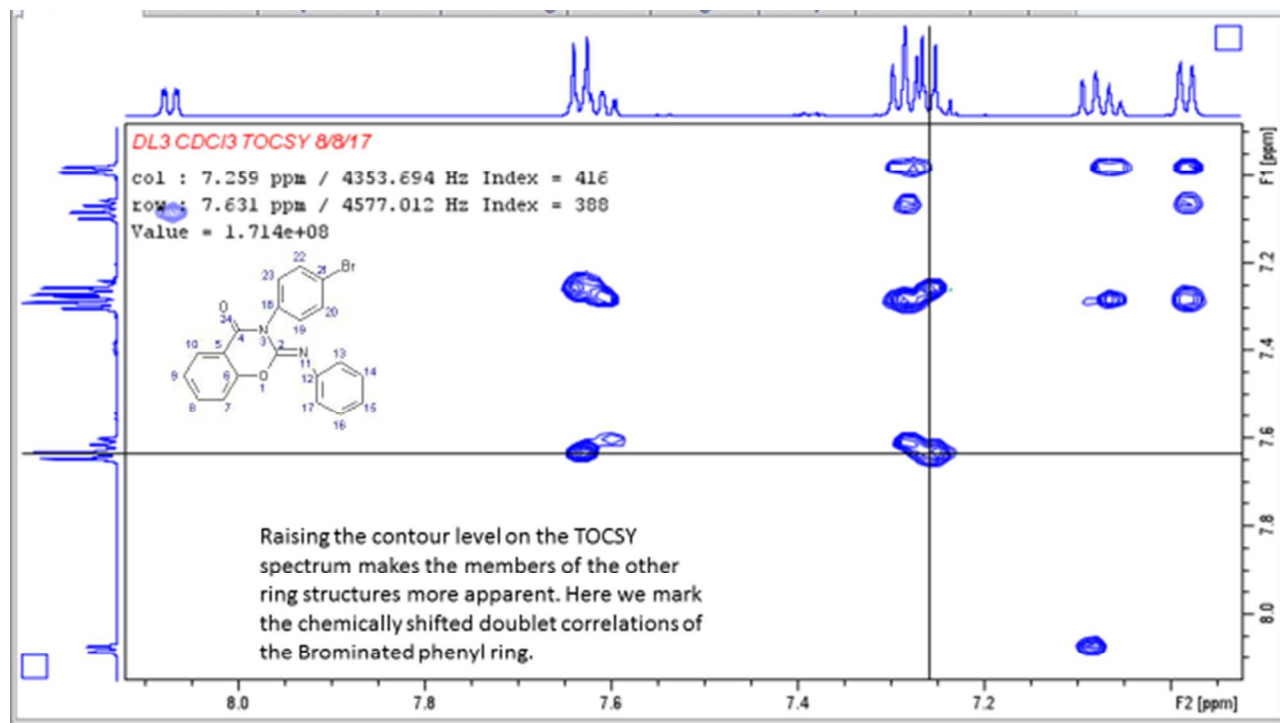

Figure S51. <sup>15</sup>N-HMBC spectra of compound 4d.

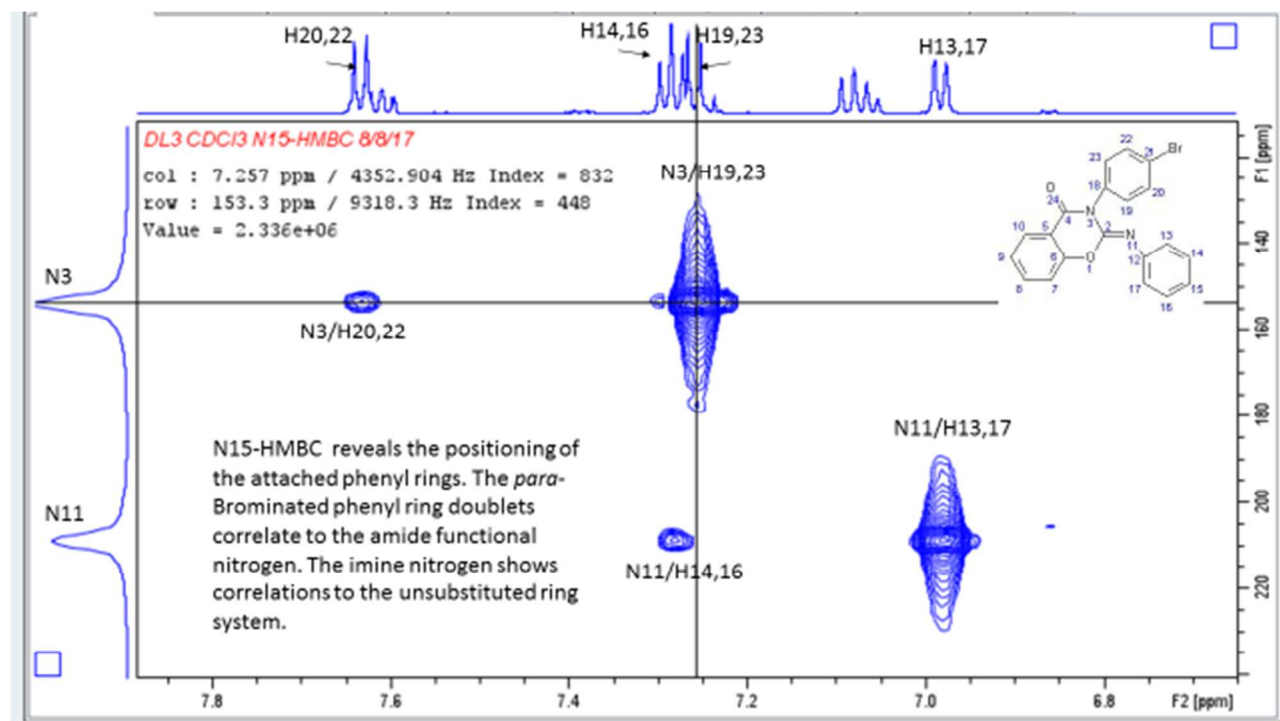



Figure S52.  $^{13}\text{C}$ -HSQC expansion spectra 2 of compound 4d.

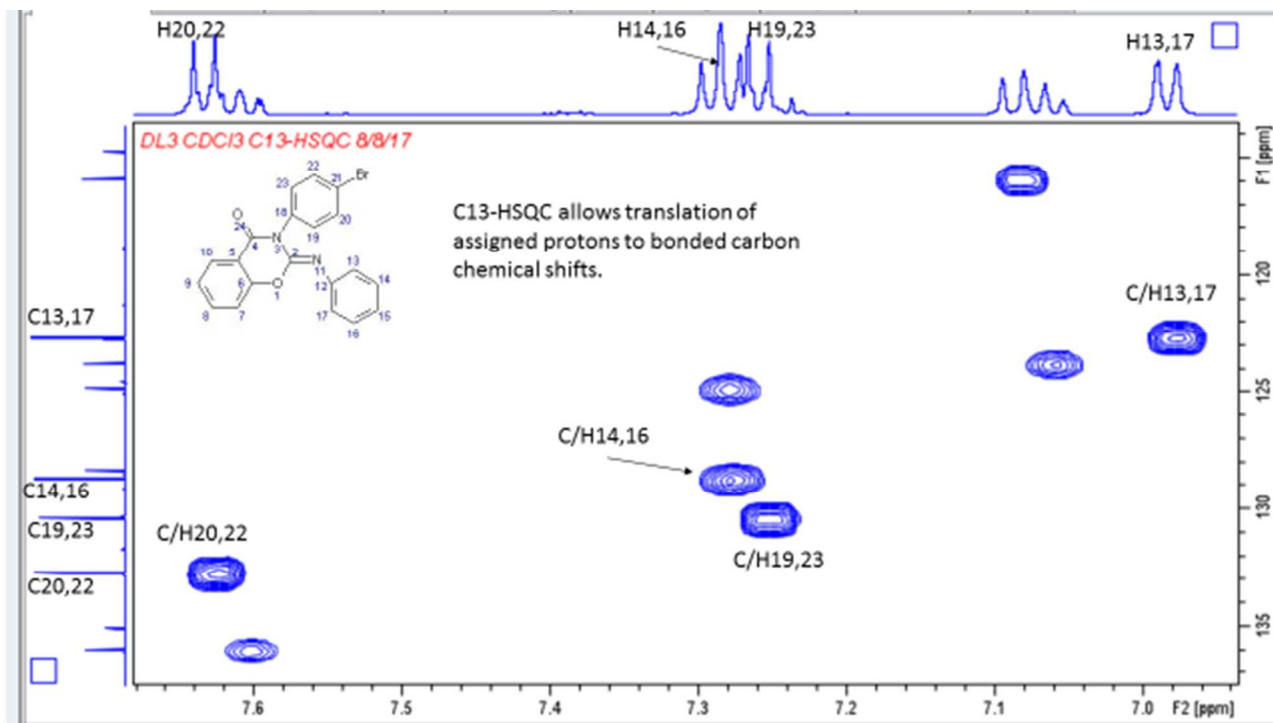

Figure S53. TOCSY expansion spectra 3 of compound 4d.

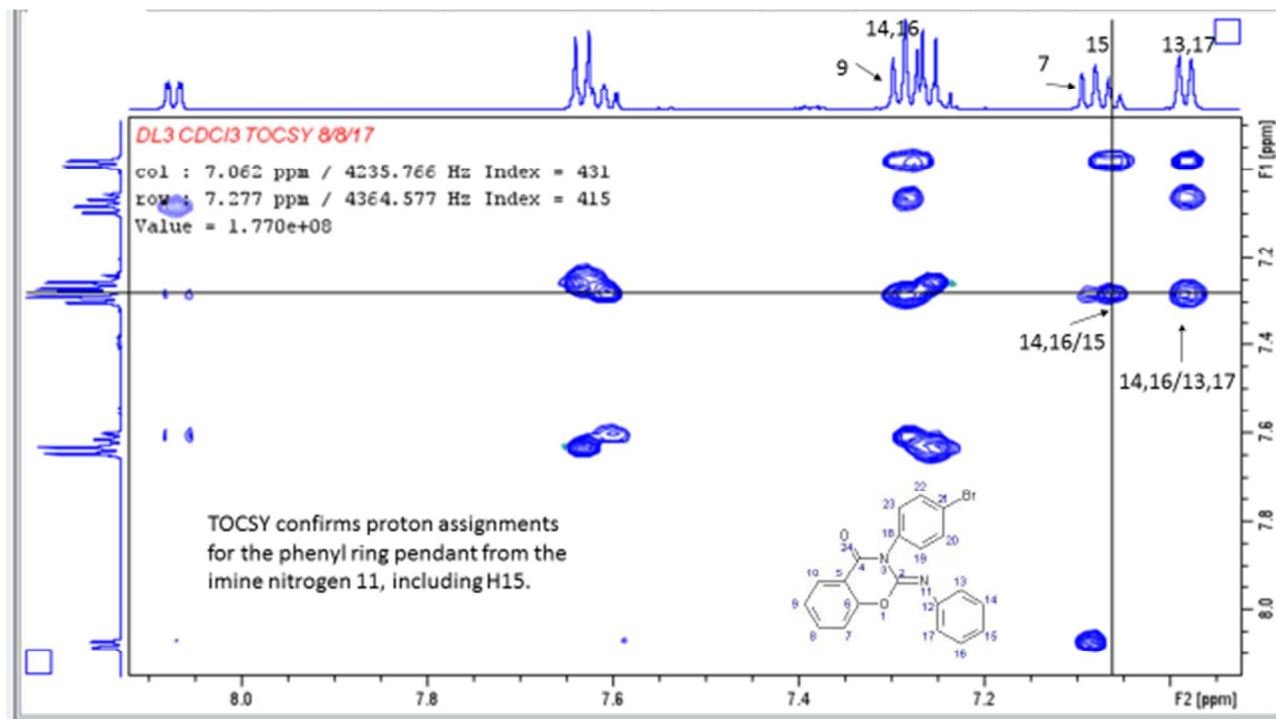

Figure S54.  $^{13}\text{C}$ -HSQC expansion spectra 3 of compound **4d**.

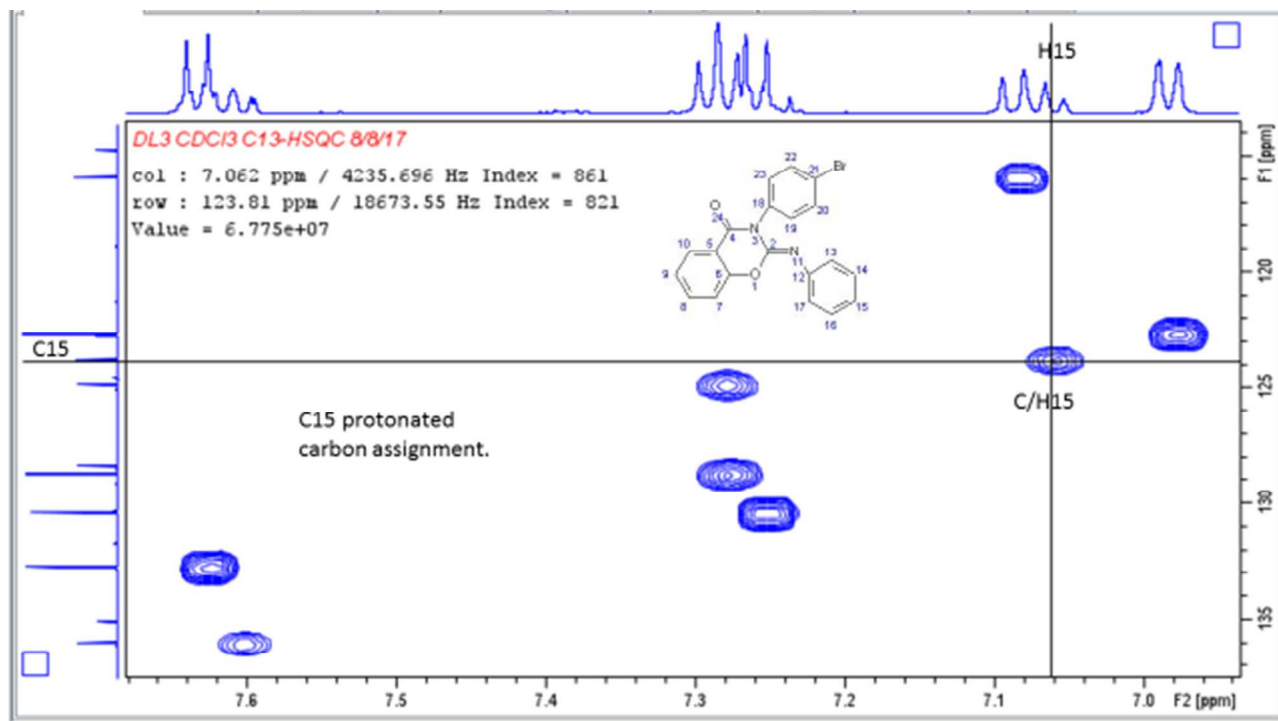

Figure S55.  $^{13}\text{C}$ -HMBC expansion spectra 1 of compound **4d**.

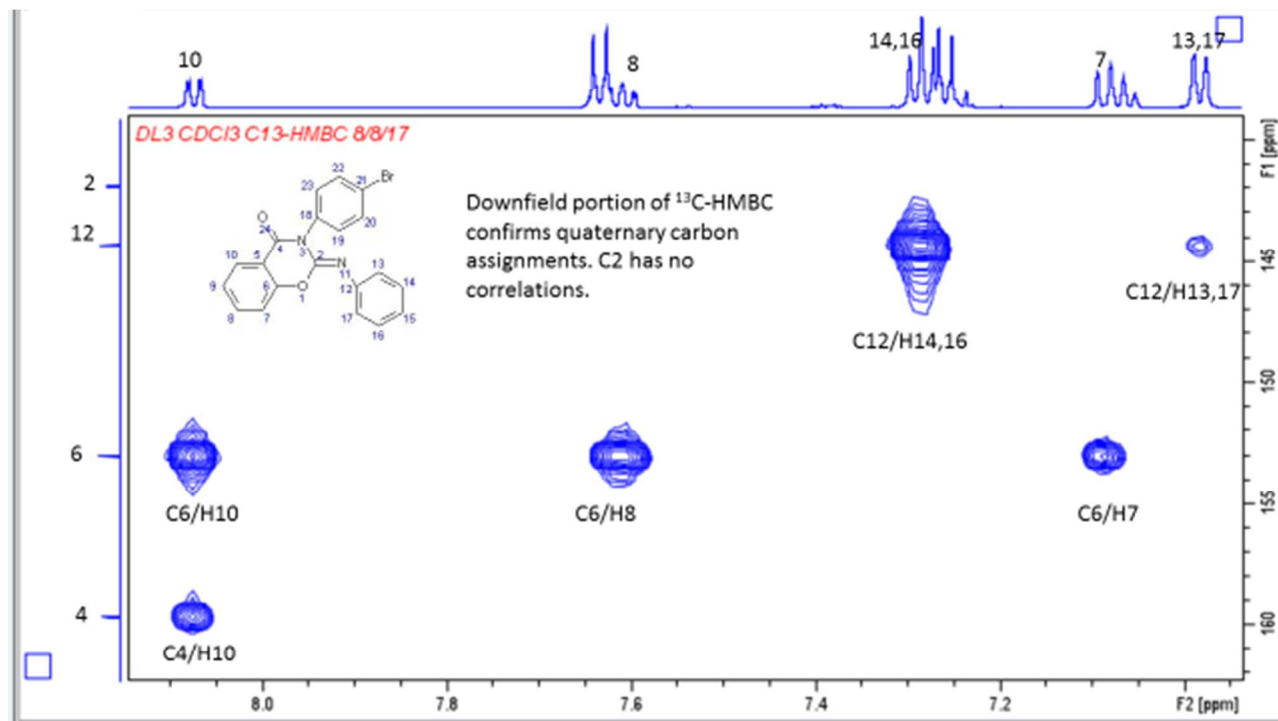

Figure S56.  $^{13}\text{C}$ -HMBC expansion spectra 2 of compound 4d.

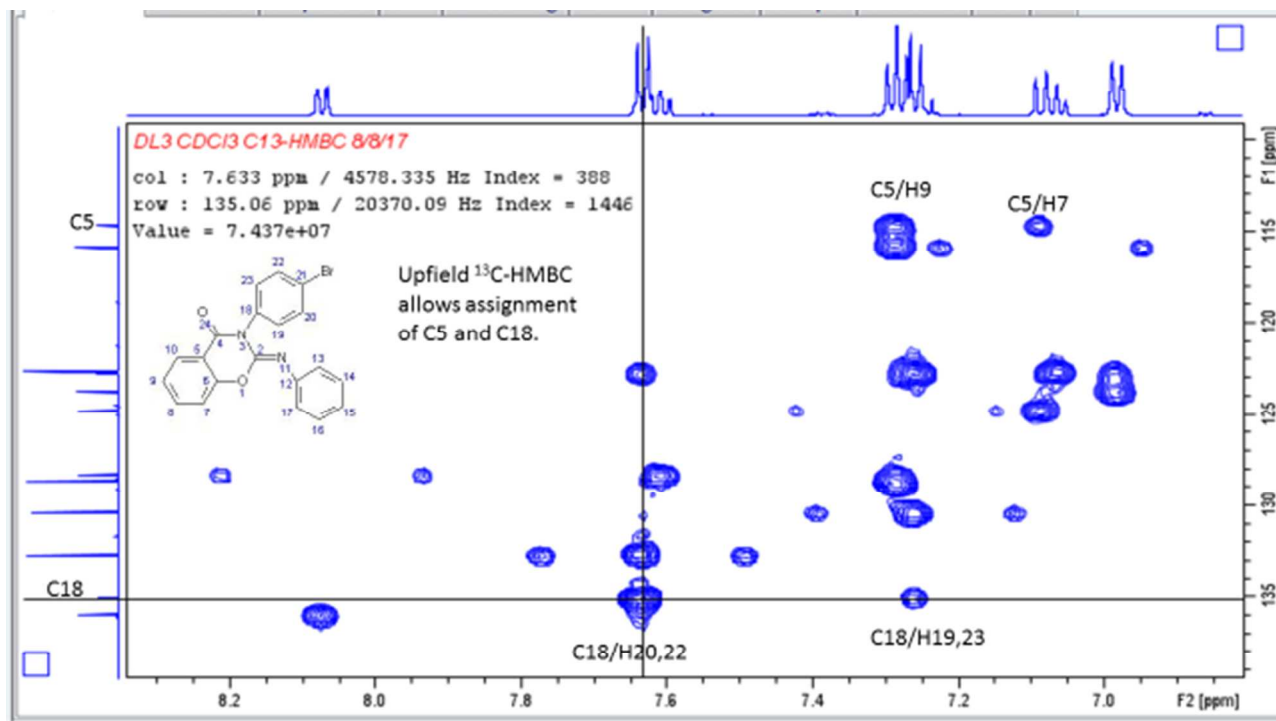

Figure S57.  $^{13}\text{C}$ -HMBC expansion spectra 3 of compound 4d.

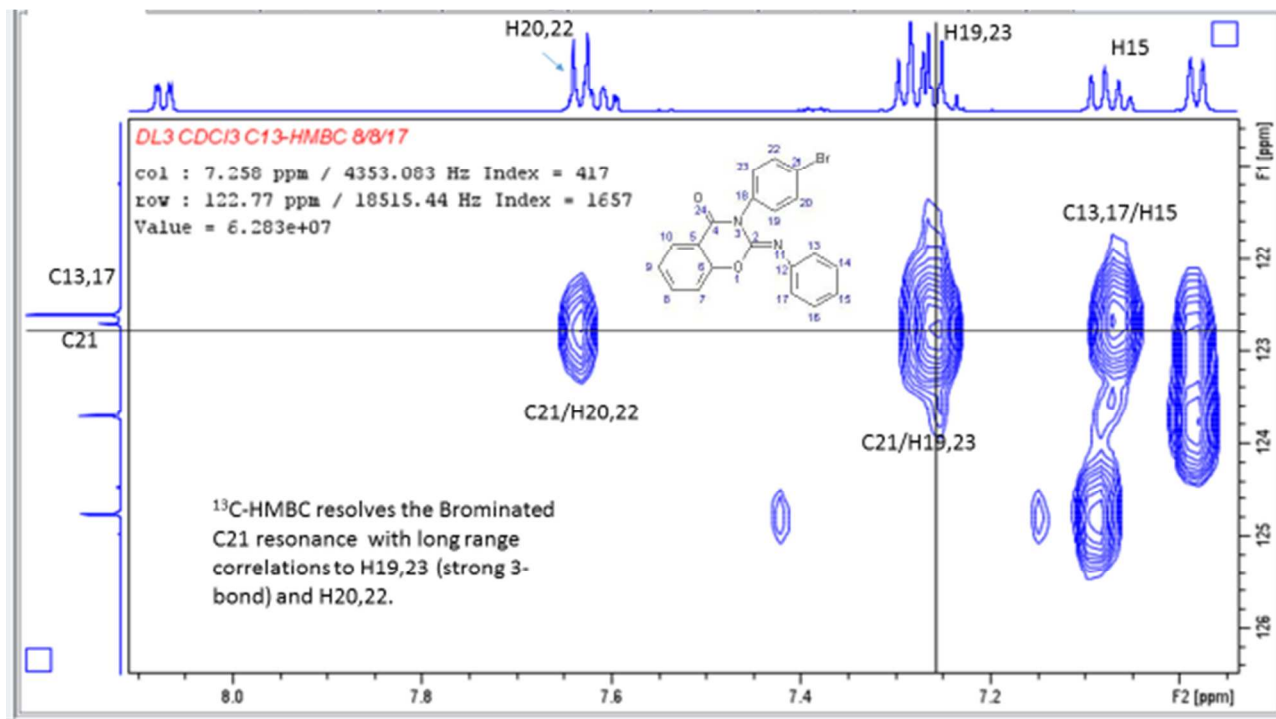

Figure S58. 2D NMR spectra atom numbering for 4f.

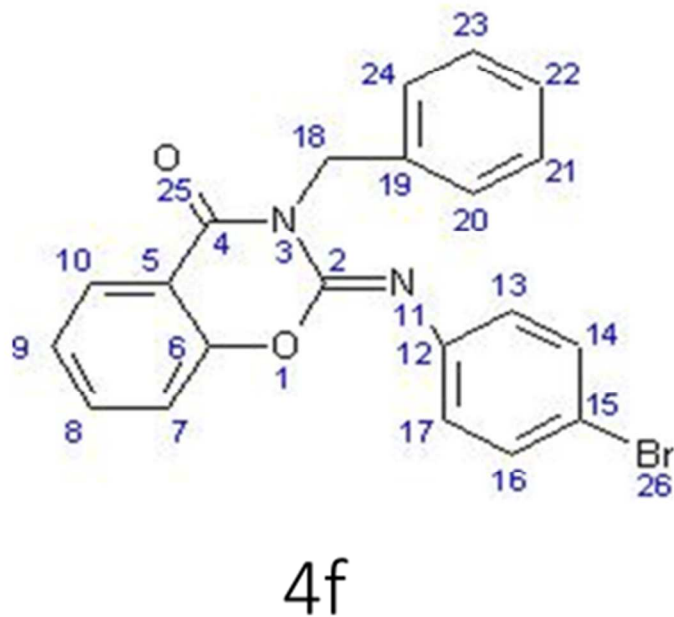

Figure S59. <sup>1</sup>H NMR expansion spectra 1 of compound 4f.

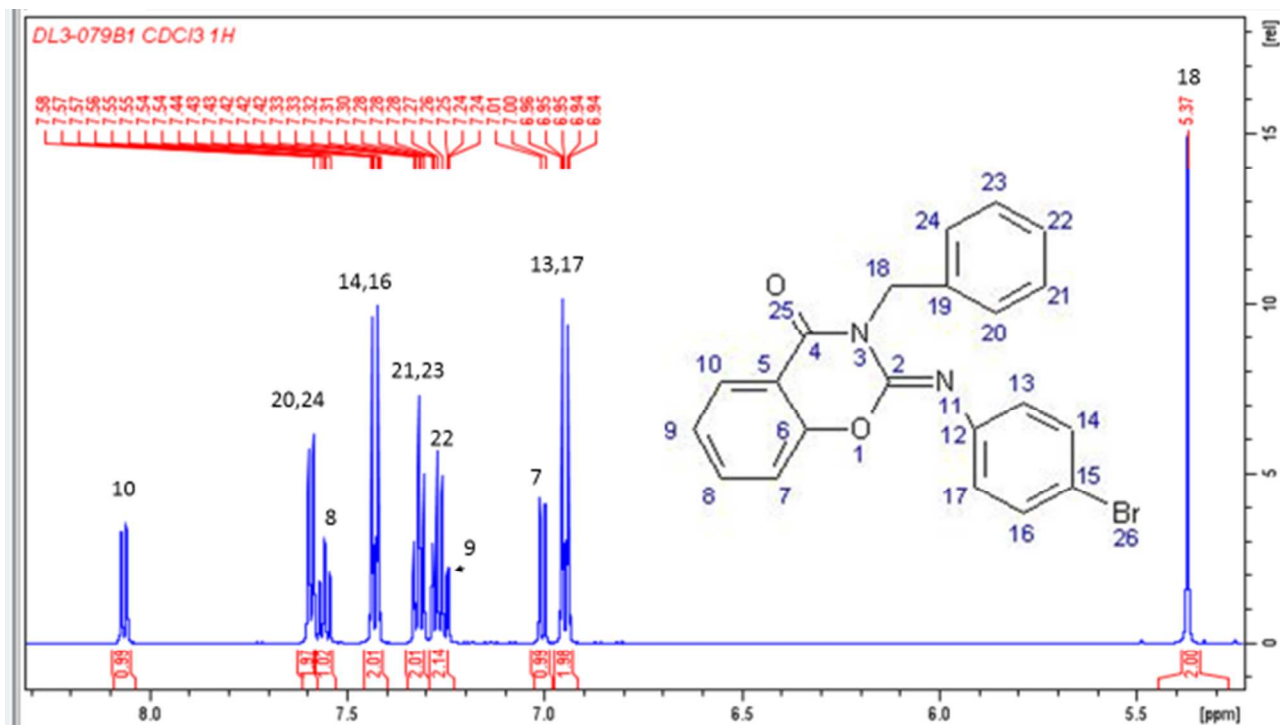

Figure S60.  $^1\text{H}$  NMR expansion spectra 2 of compound 4f.

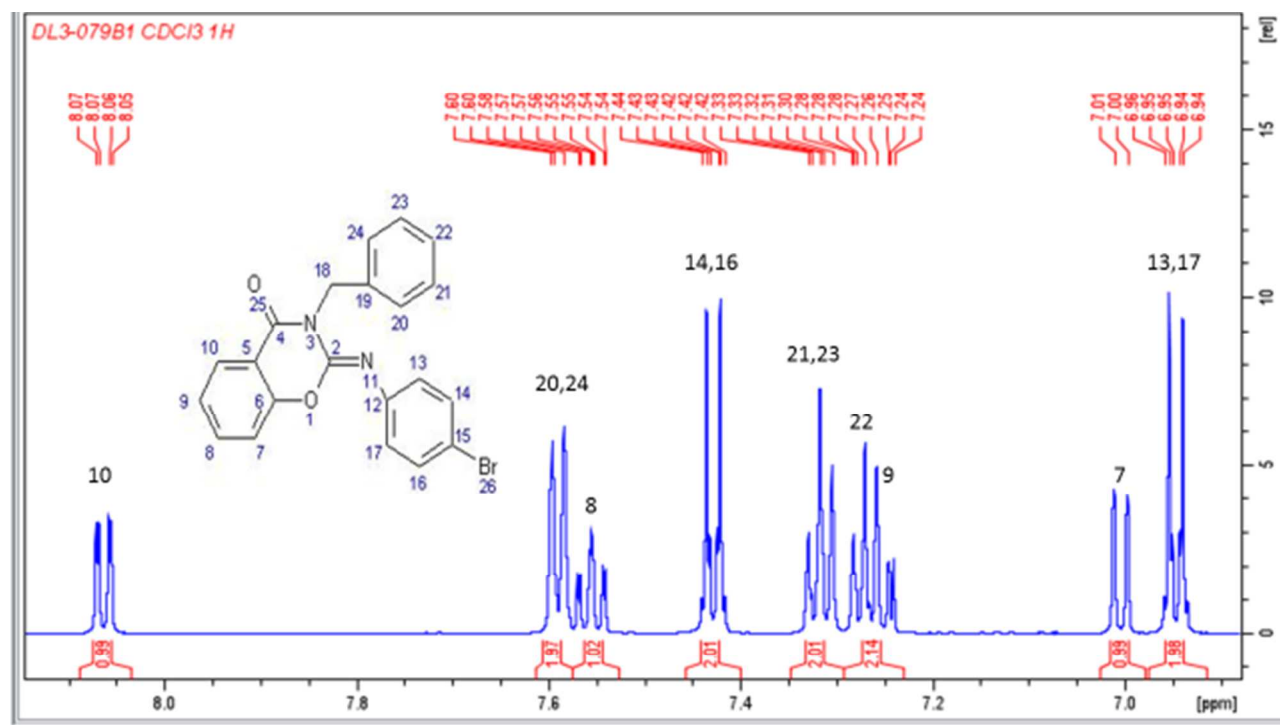

Figure S61.  $^{13}\text{C}$  NMR expansion spectra 1 of compound 4f.

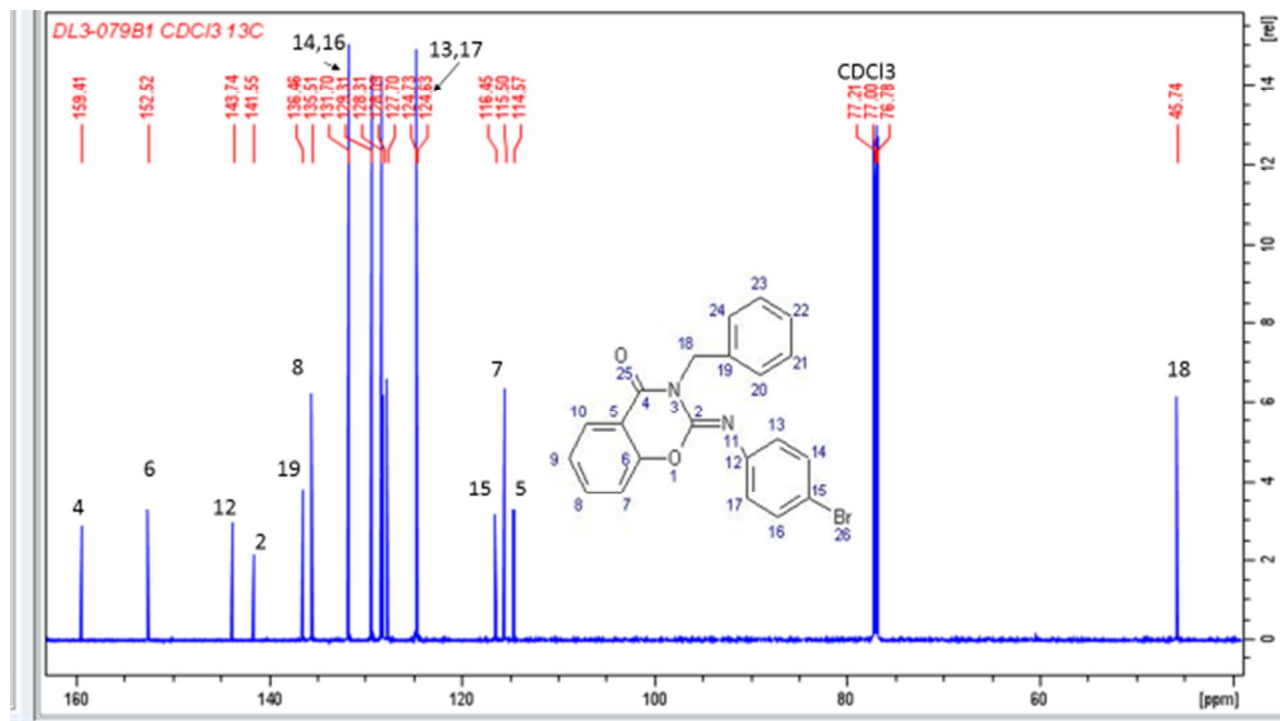

Figure S62.  $^{13}\text{C}$  NMR expansion spectra 2 of compound 4f.

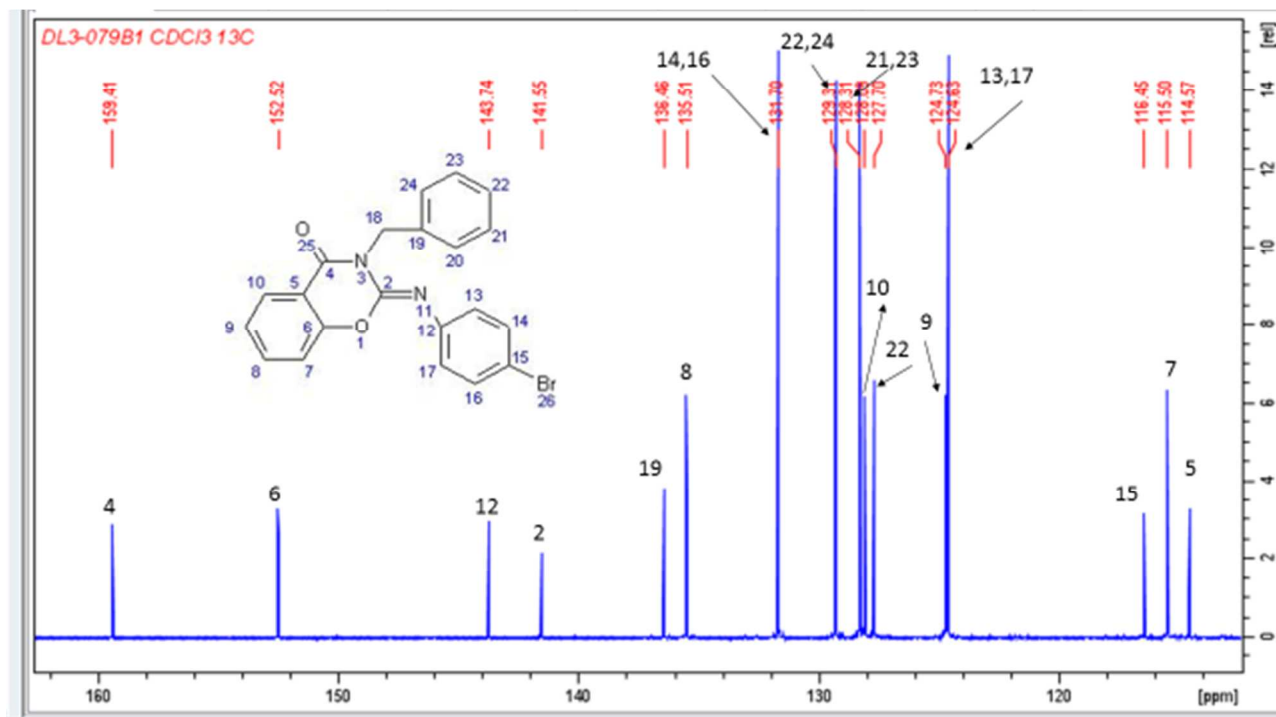

Figure S63.  $^{13}\text{C}$ -HMBC expansion spectra 1 of compound 4f.

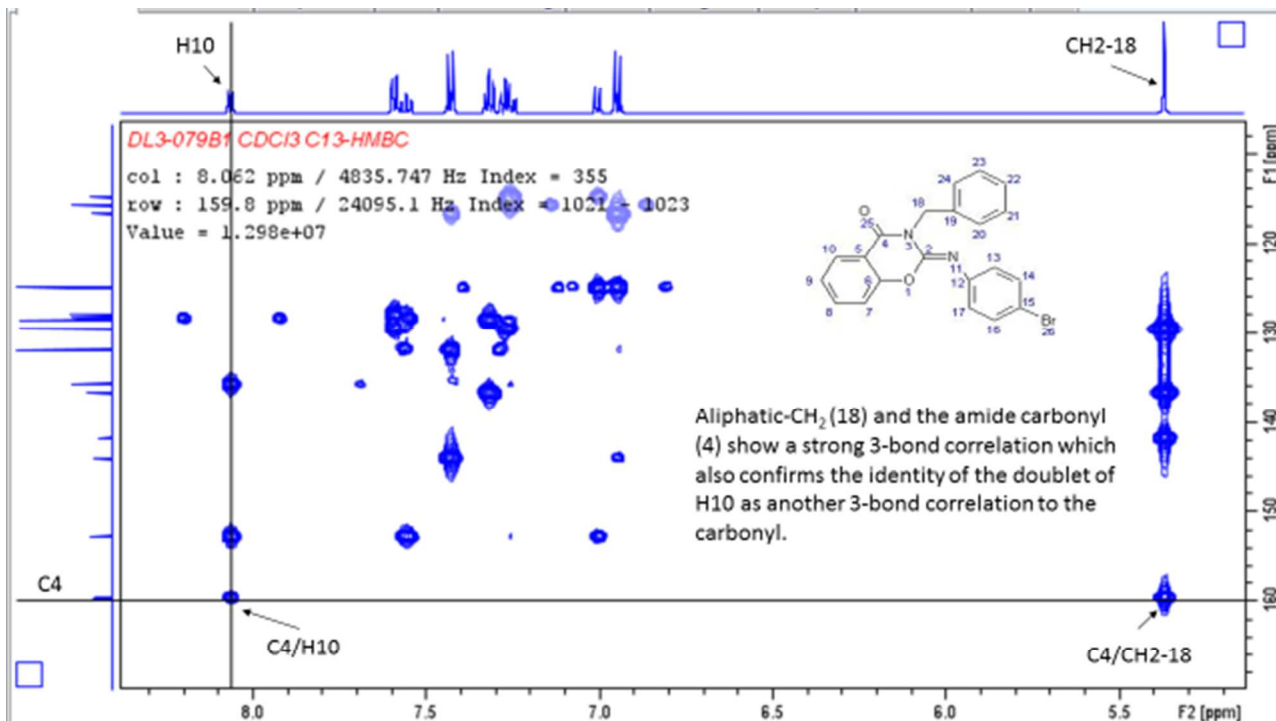



Figure S64. COSY expansion spectra 1 of compound 4f.

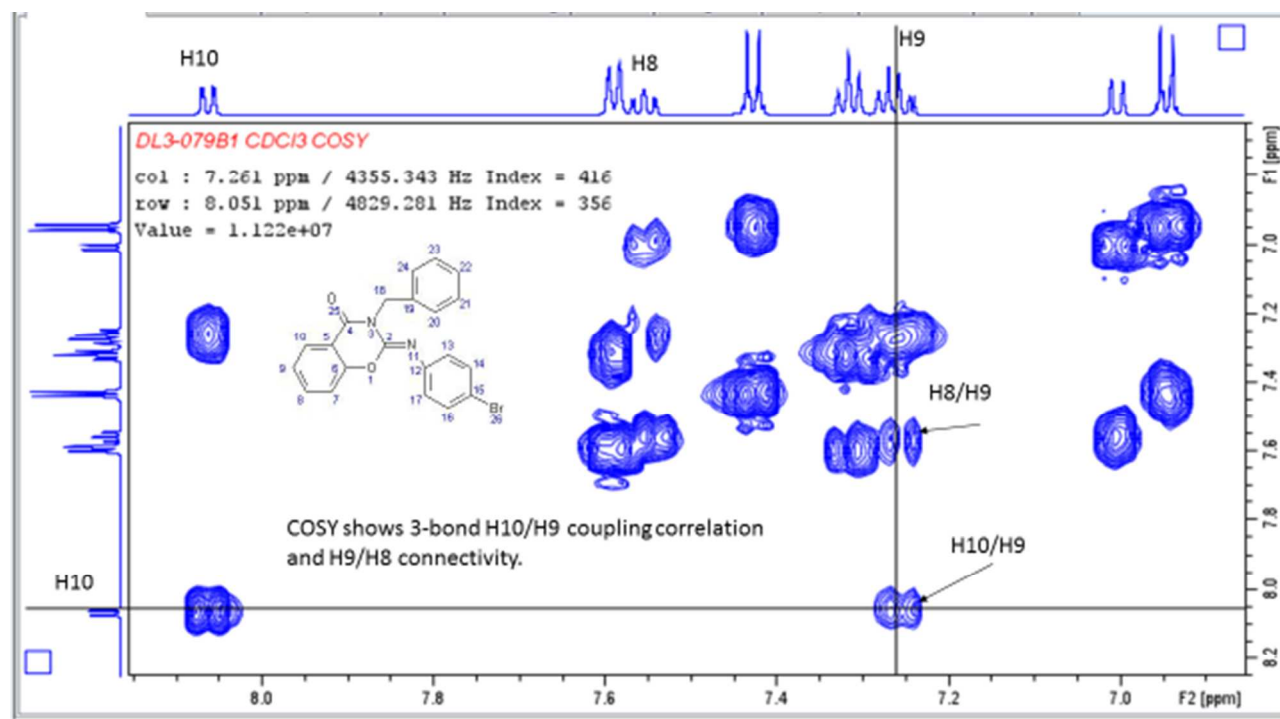

Figure S65. COSY expansion spectra 2 of compound 4f.

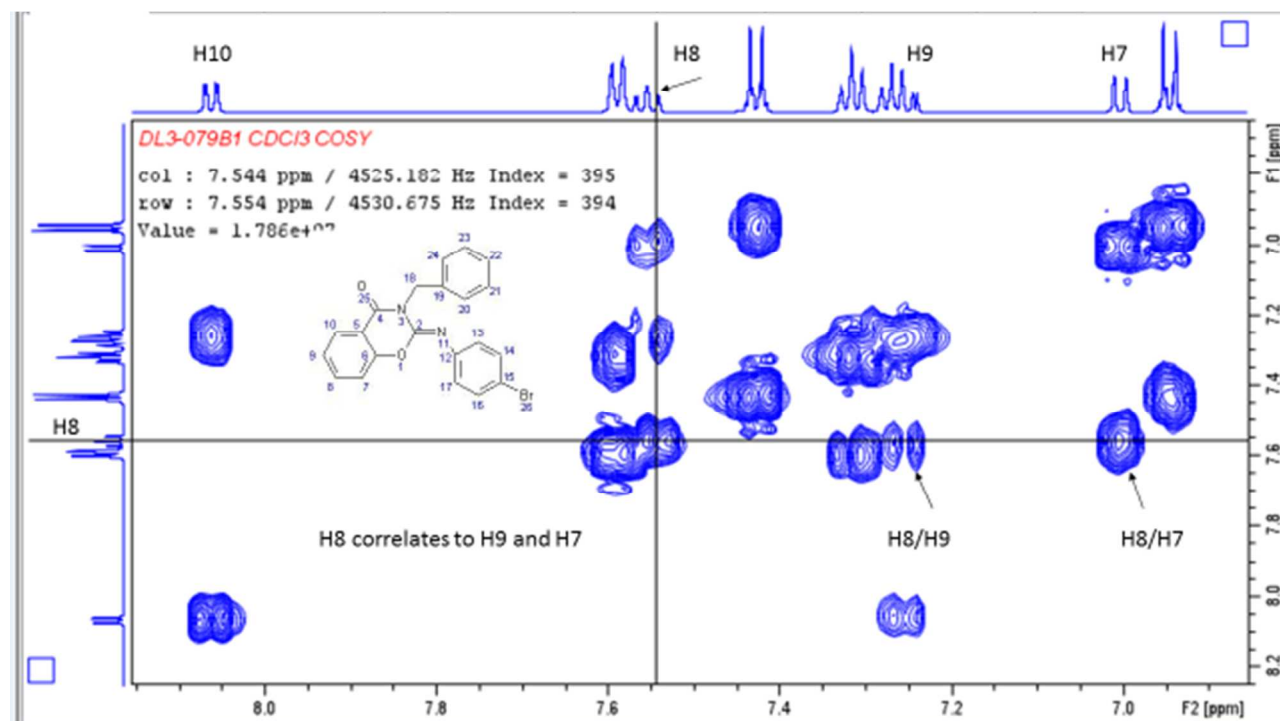

Figure S66.  $^{13}\text{C}$ -HSQC expansion spectra 1 of compound **4f**.

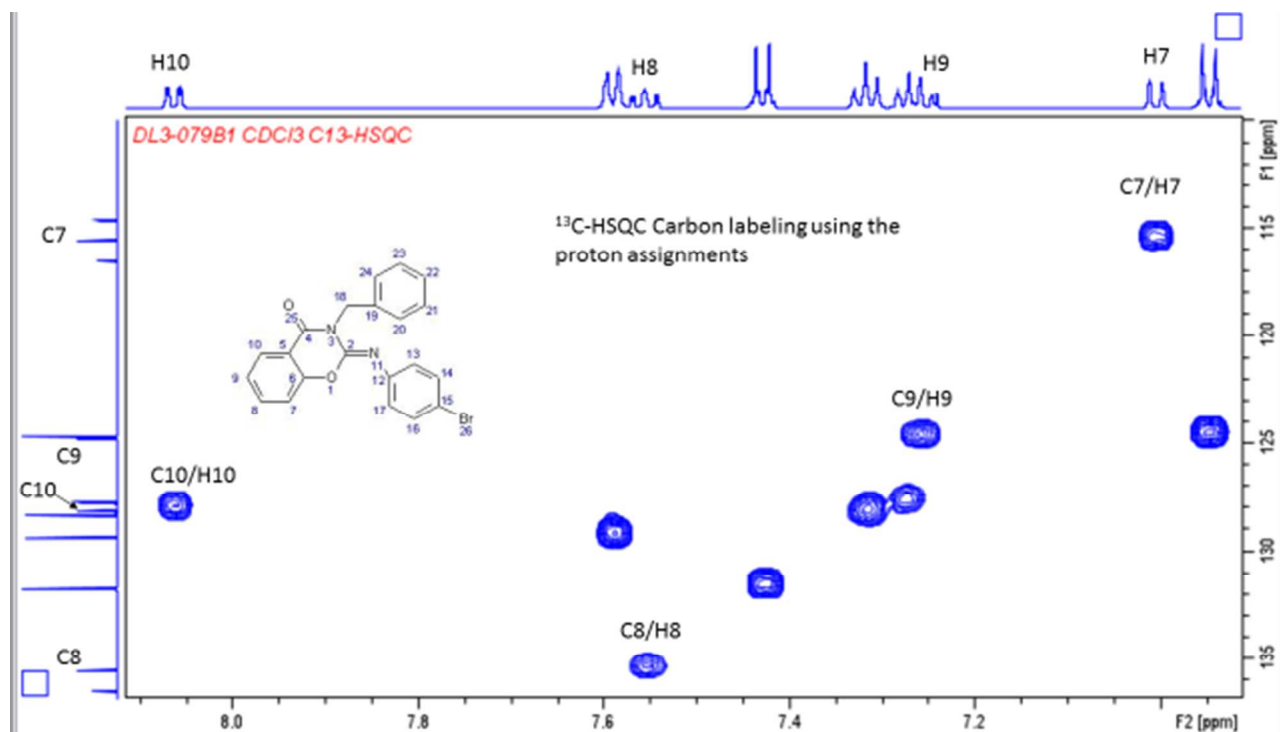

Figure S67.  $^{13}\text{C}$ -HMBC expansion spectra 2 of compound **4f**.

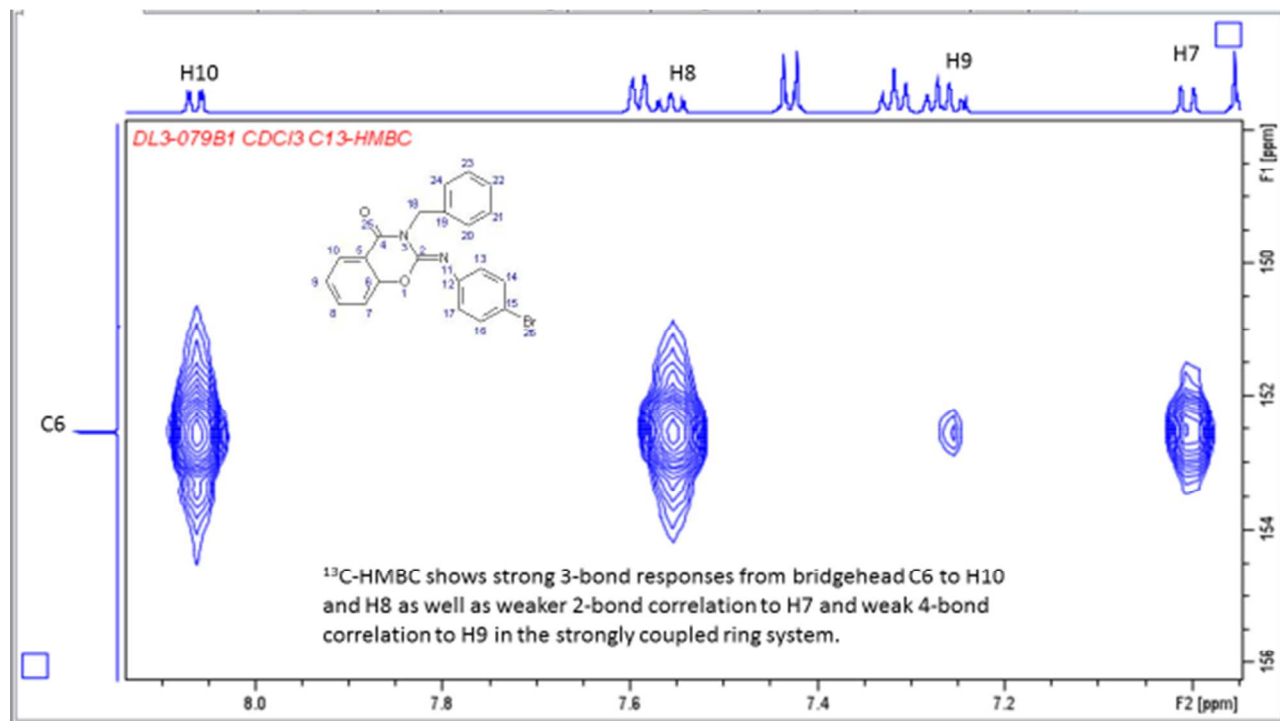



Figure S68.  $^{13}\text{C}$ -HMBC expansion spectra 3 of compound 4f.

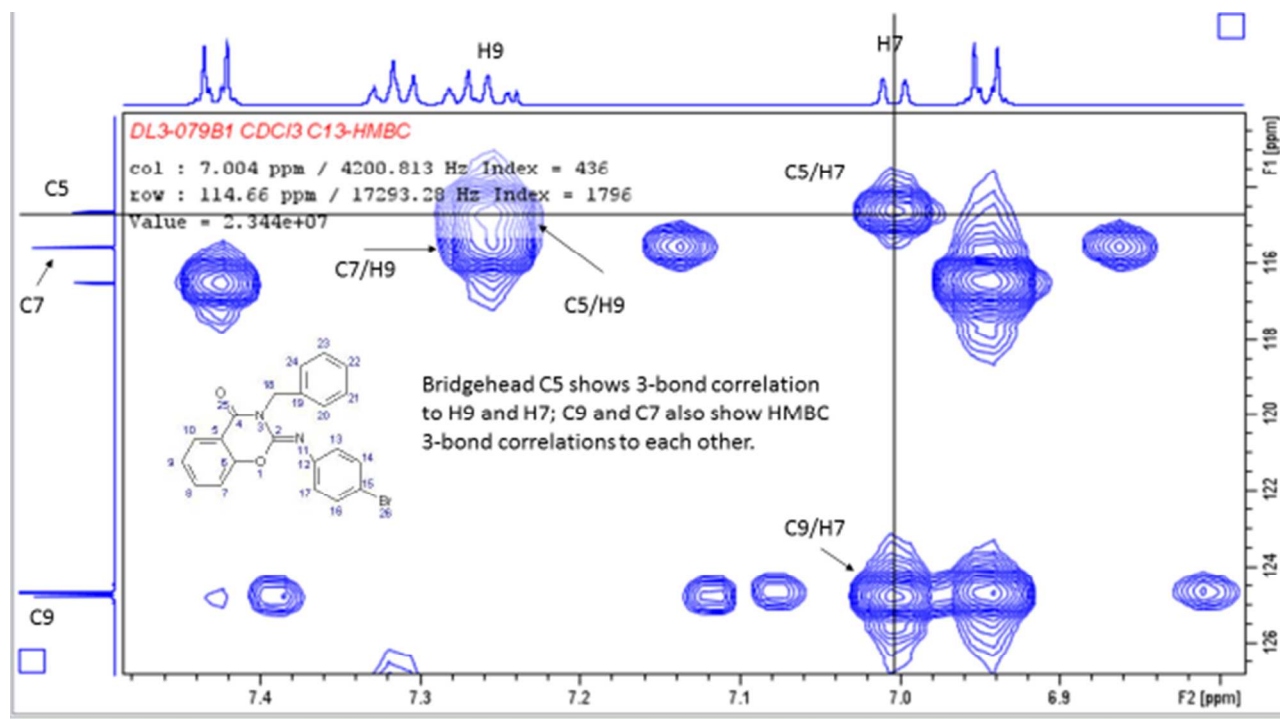

Figure S69.  $^{13}\text{C}$ -HMBC expansion spectra 4 of compound 4f.

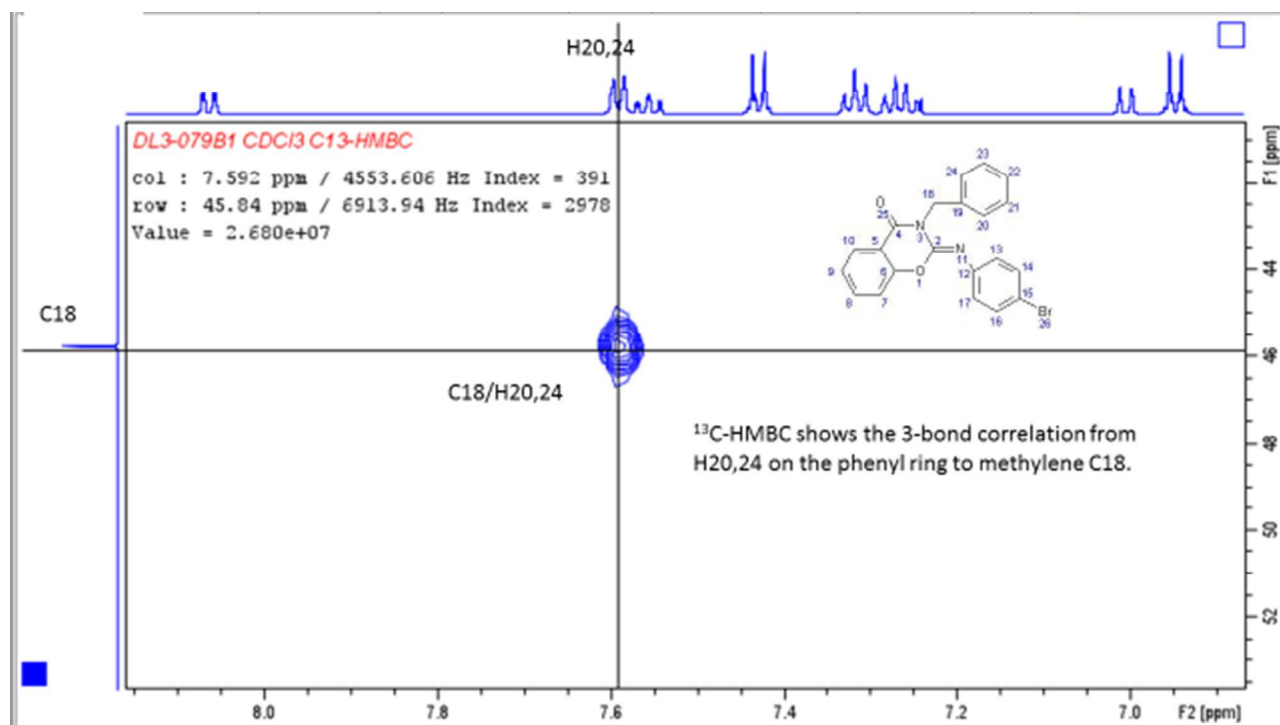

Figure S70. COSY expansion spectra 3 of compound 4f.

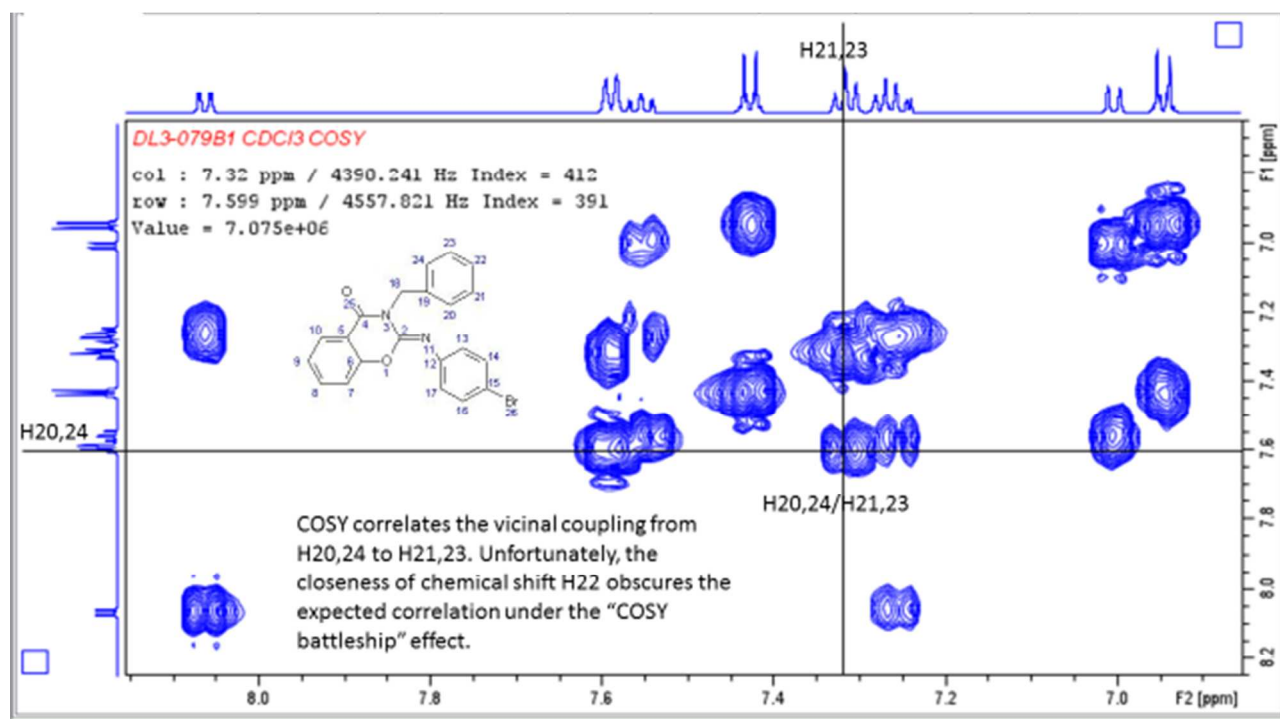

Figure S71. TOCSY expansion spectra of compound 4f.

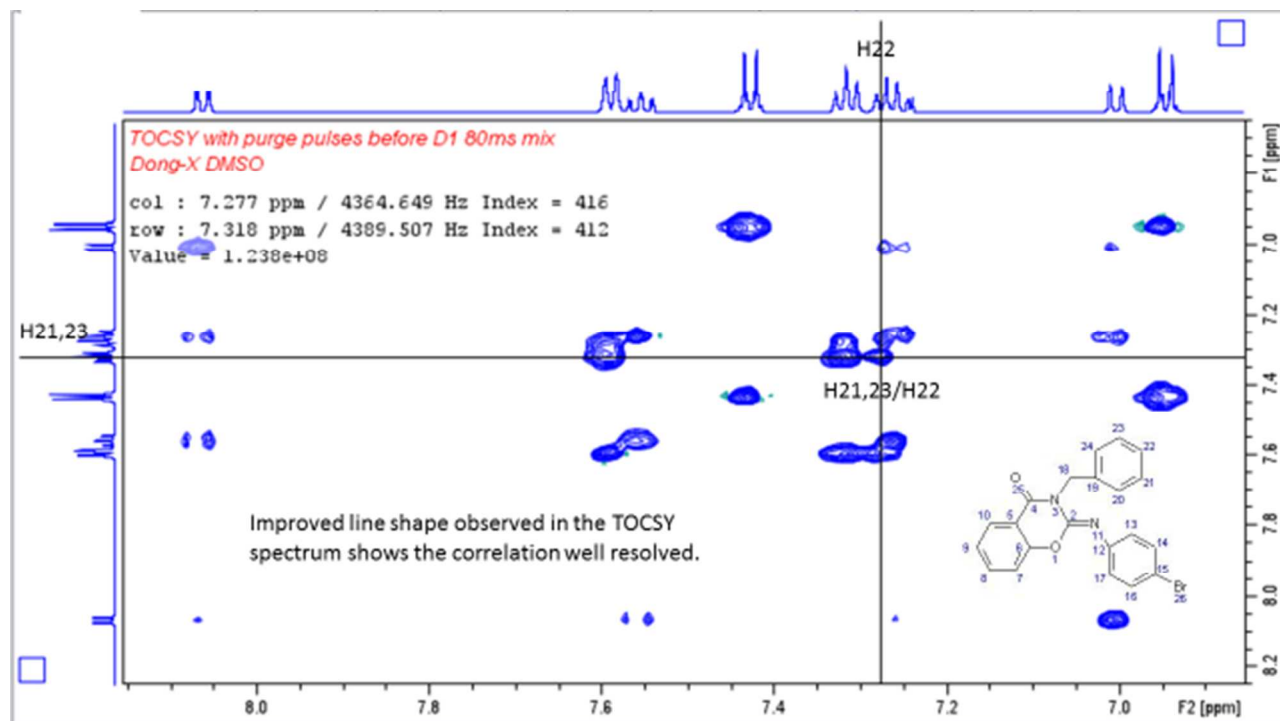

Figure S72. <sup>13</sup>C-HSQC expansion spectra 2 of compound 4f.

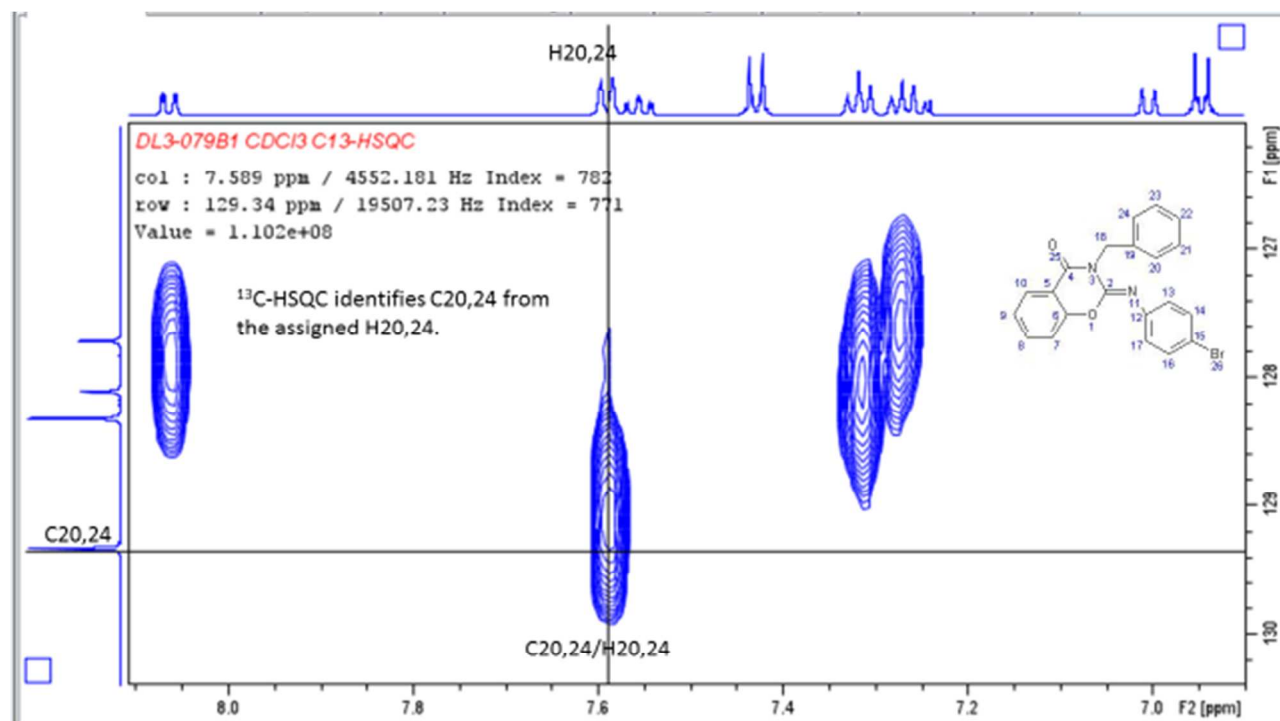

Figure S73.  $^{13}\text{C}$ -HSQC expansion spectra 3 of compound 4f.

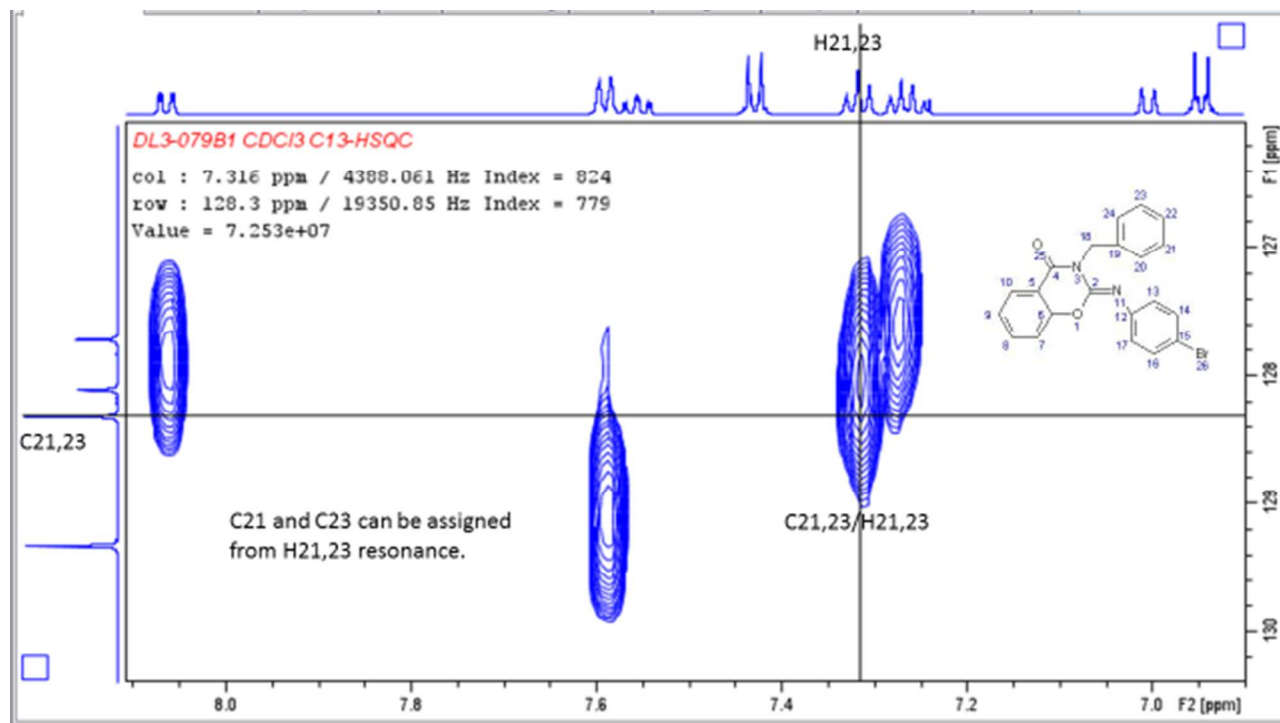

Figure S74.  $^{13}\text{C}$ -HSQC expansion spectra 4 of compound 4f.

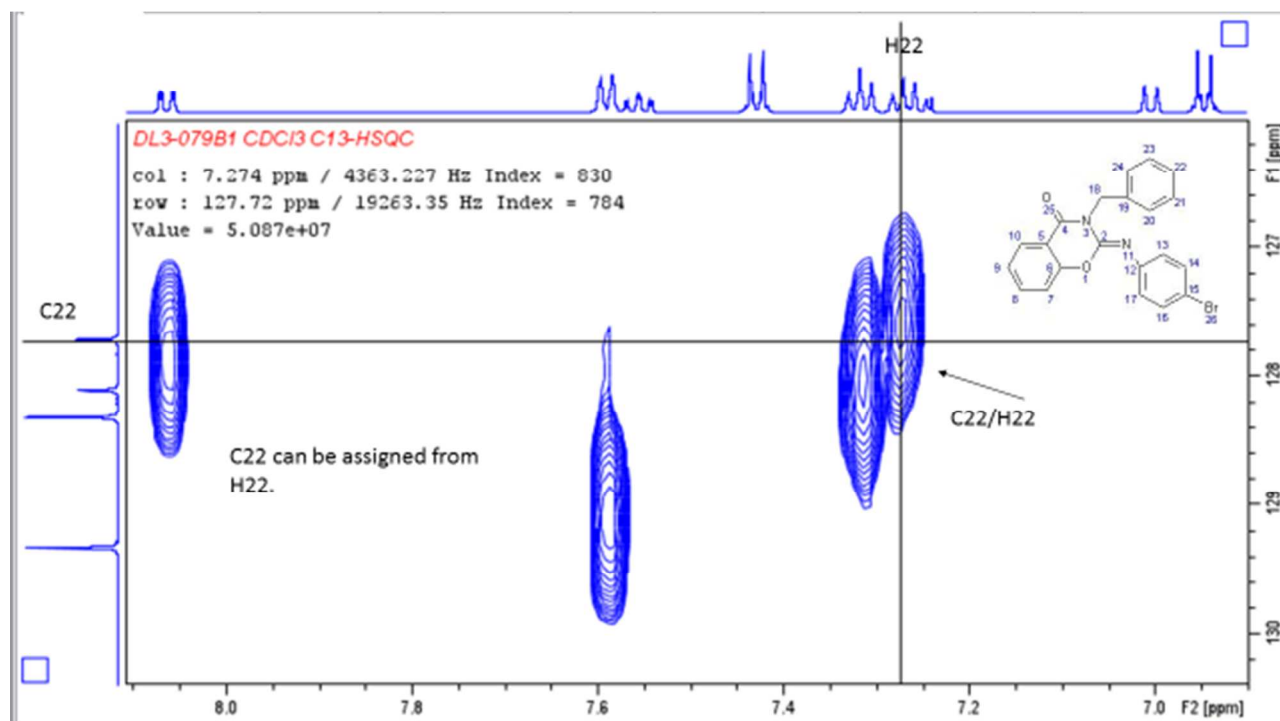

Figure S75.  $^{13}\text{C}$ -HMBC expansion spectra 5 of compound 4f.

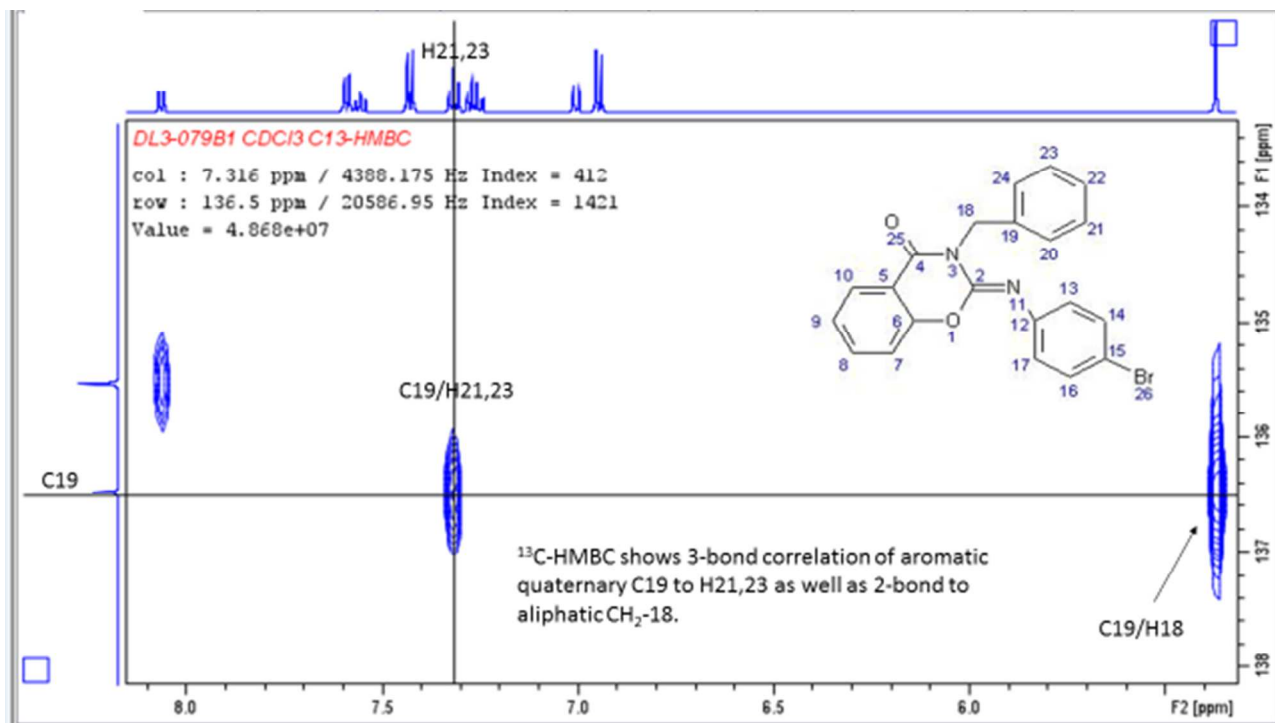

Figure S76.  $^{13}\text{C}$ -HMBC expansion spectra 6 of compound 4f.

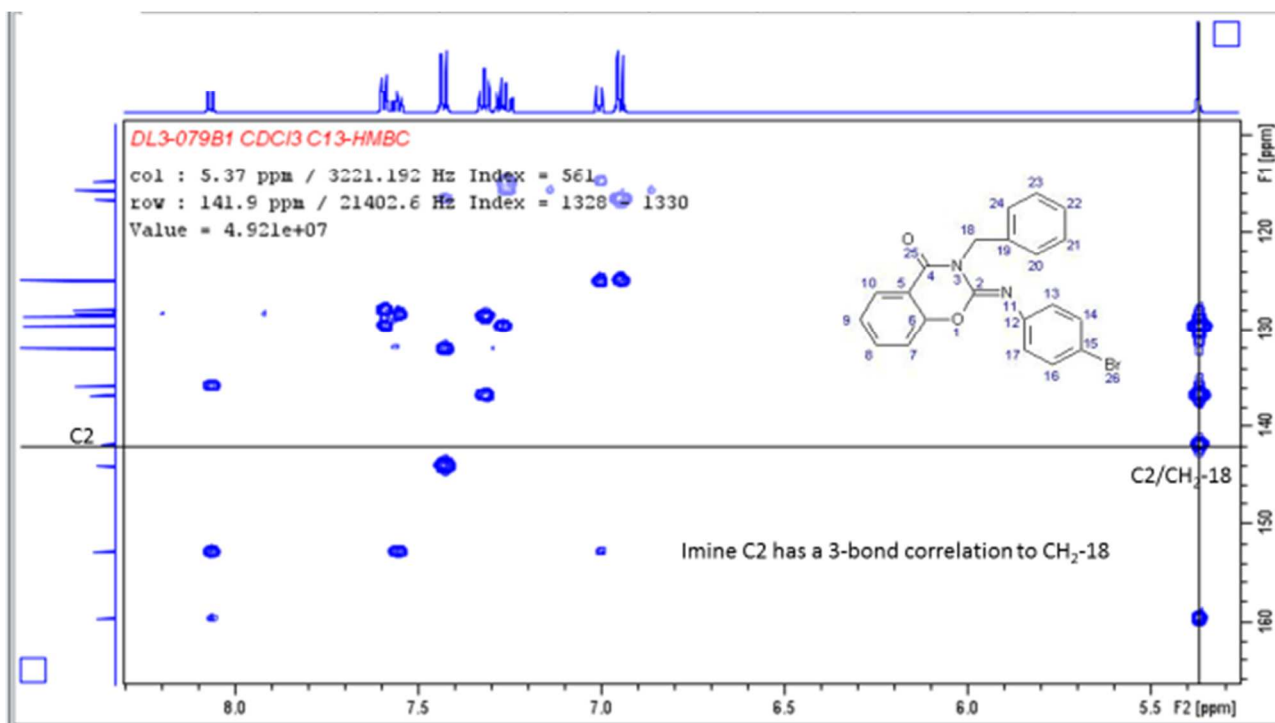

Figure S77. COSY expansion spectra 4 of compound 4f.

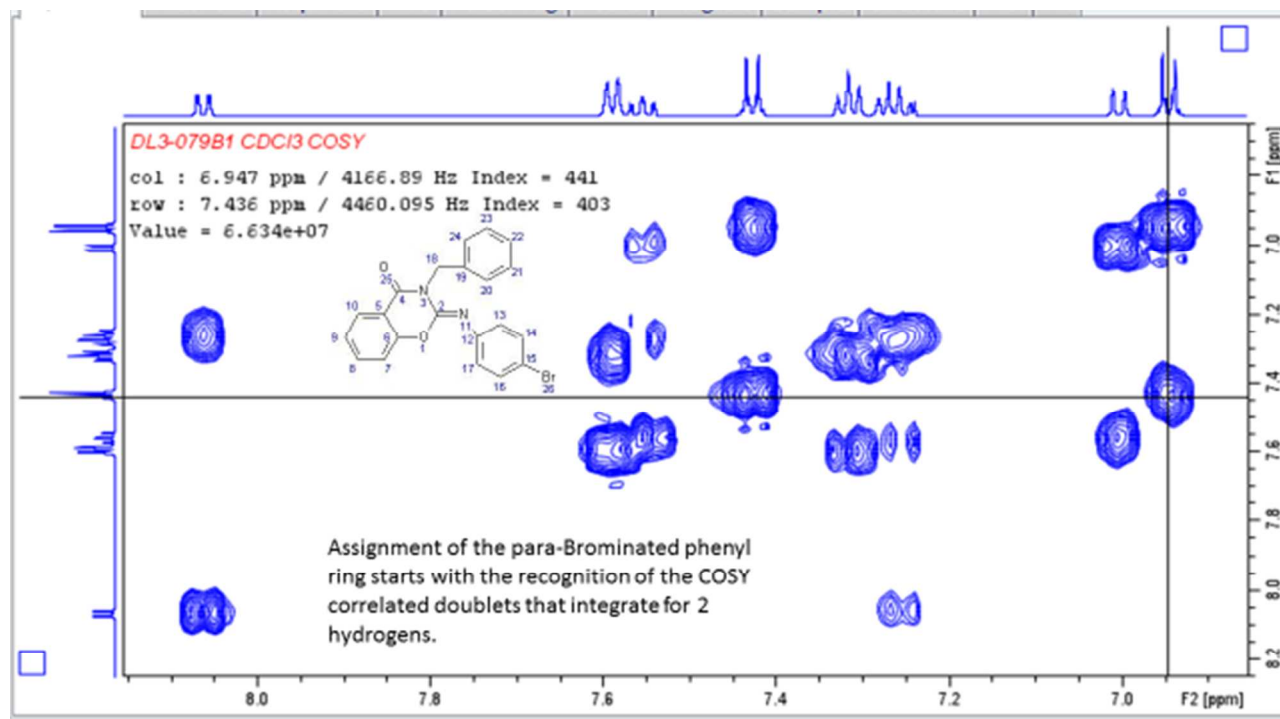

Figure S78. <sup>15</sup>N-HMBC expansion spectra 1 of compound 4f.

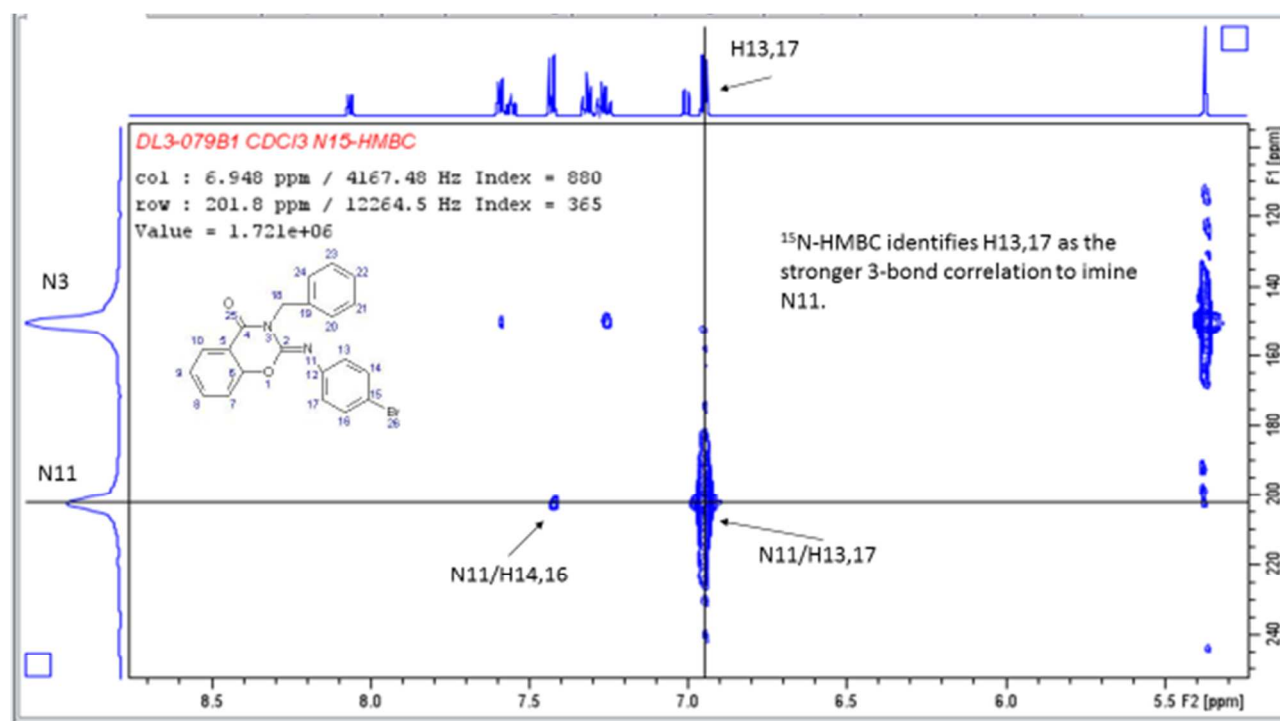

Figure S79.  $^{15}\text{N}$ -HMBC expansion spectra 2 of compound 4f.

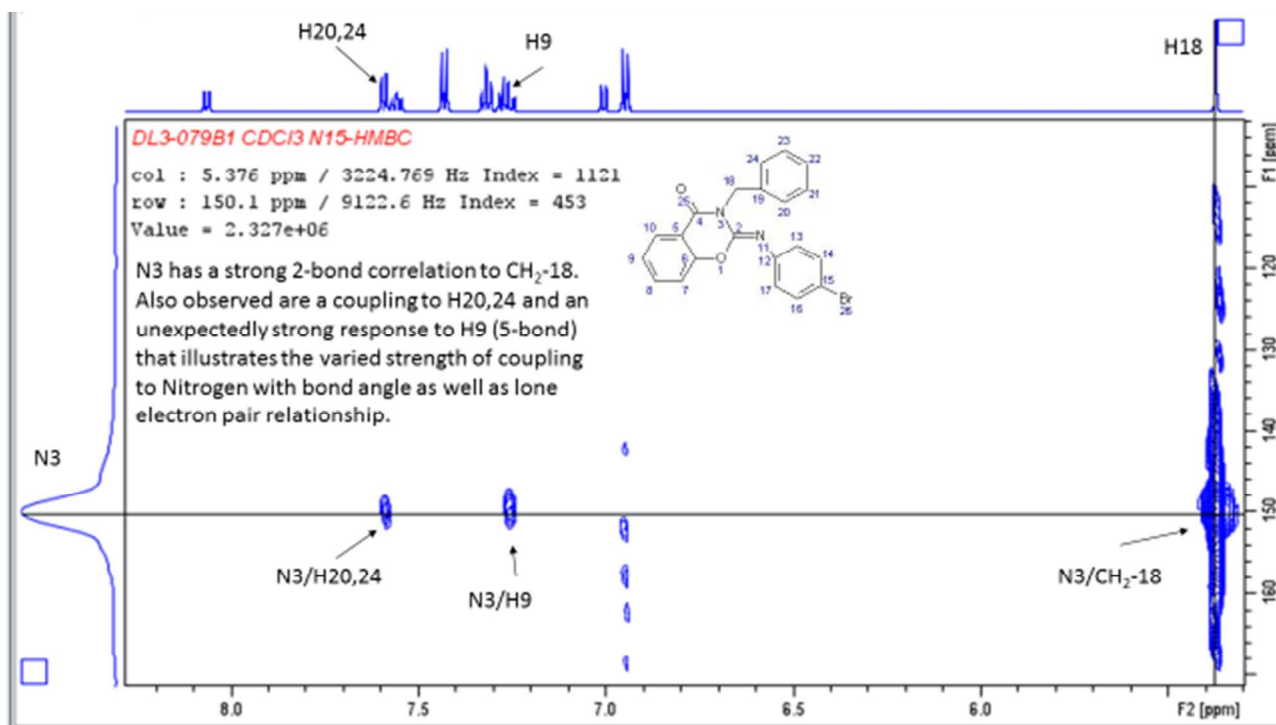

Figure S80.  $^{13}\text{C}$ -HSQC expansion spectra 5 of compound 4f.

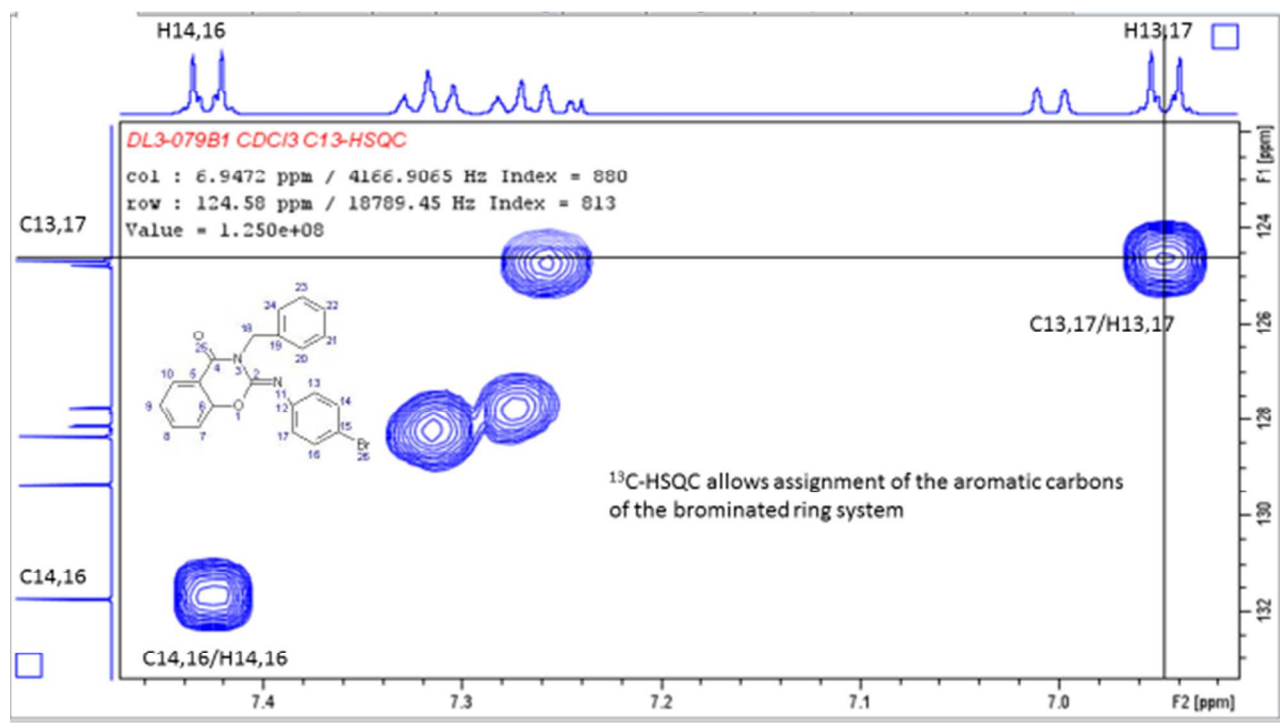



Figure S81.  $^{13}\text{C}$ -HMBC expansion spectra 7 of compound 4f.

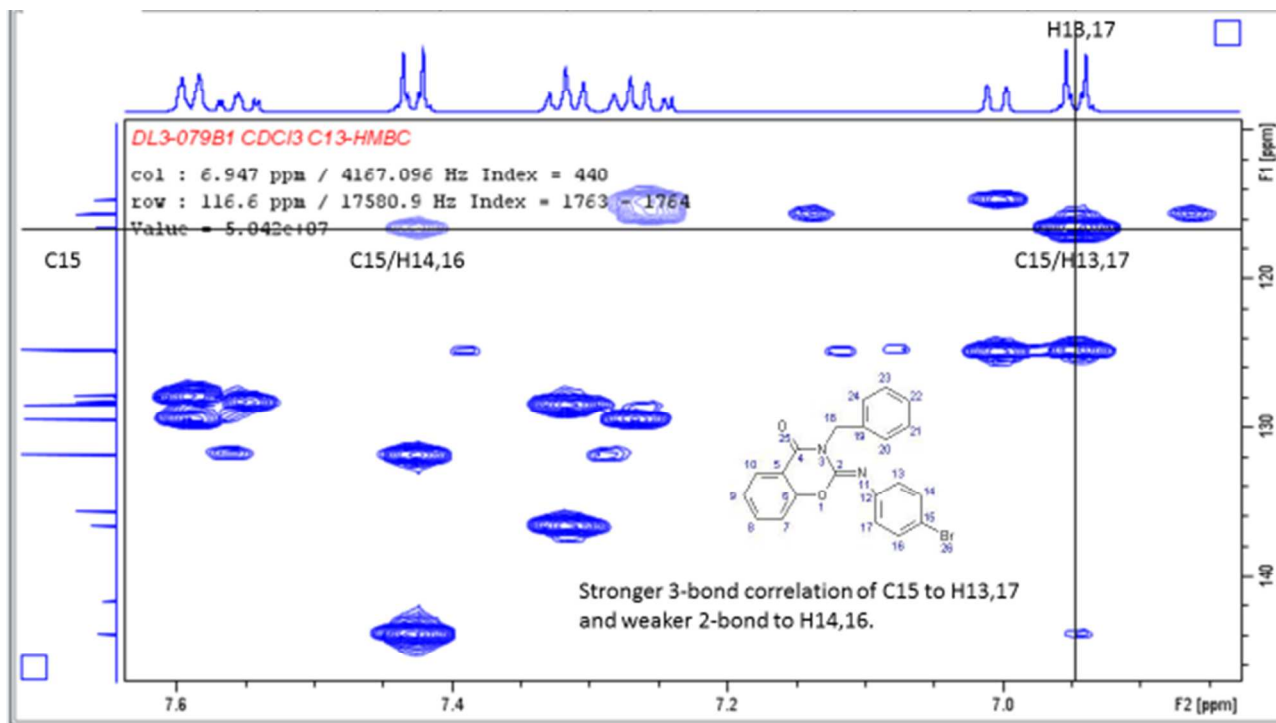

Figure S82.  $^{13}\text{C}$ -HMBC expansion spectra 8 of compound 4f.

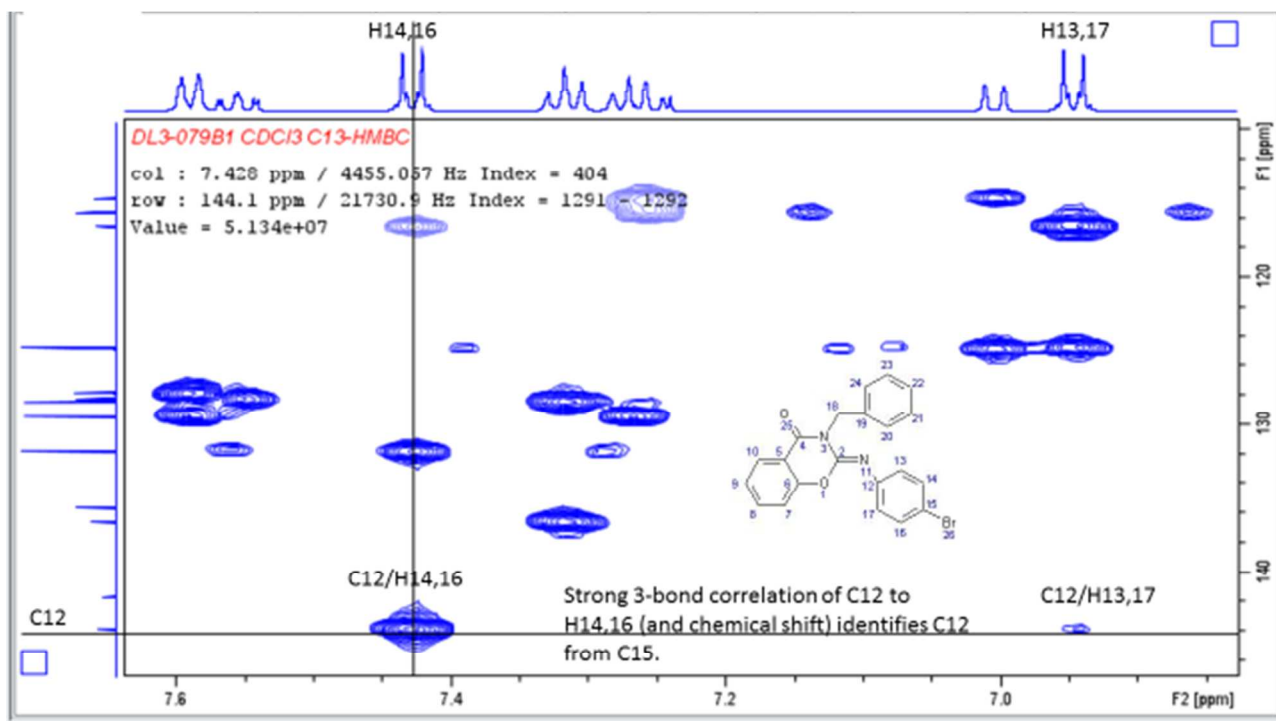





Figure S85. <sup>1</sup>H NMR expansion spectra 1 of compound 10.

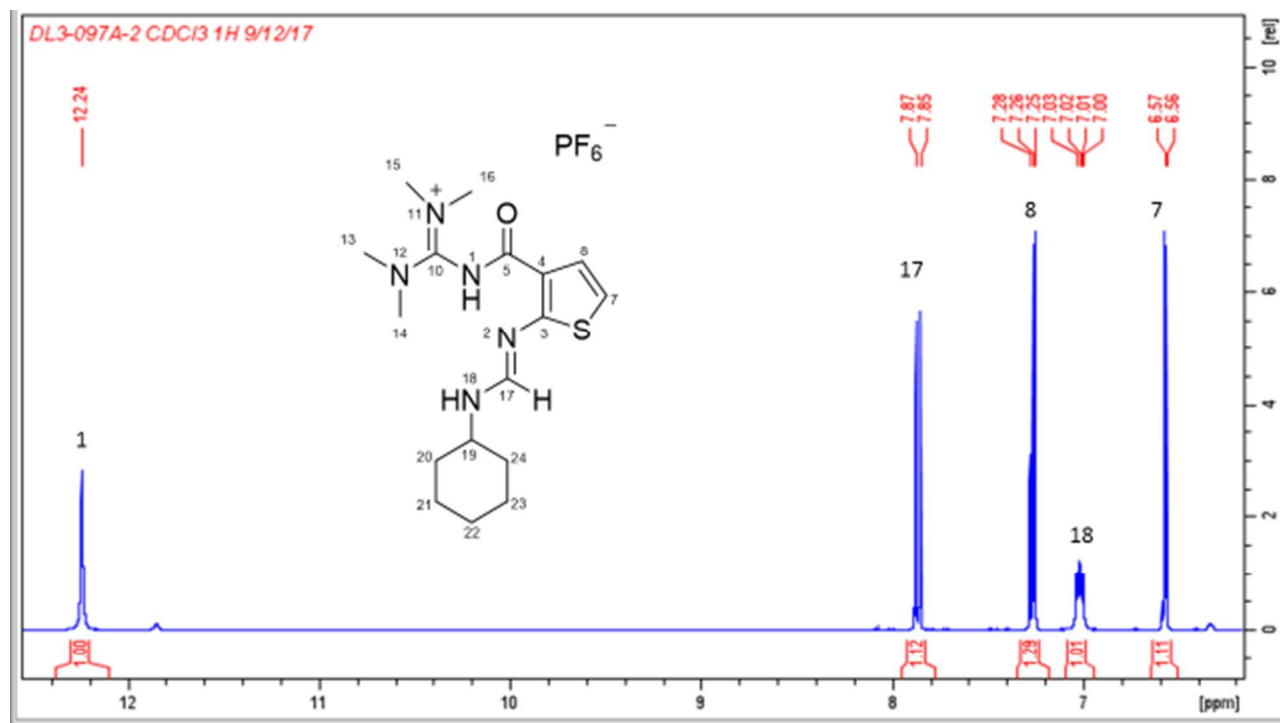

Figure S86. <sup>1</sup>H NMR expansion spectra 2 of compound 10.

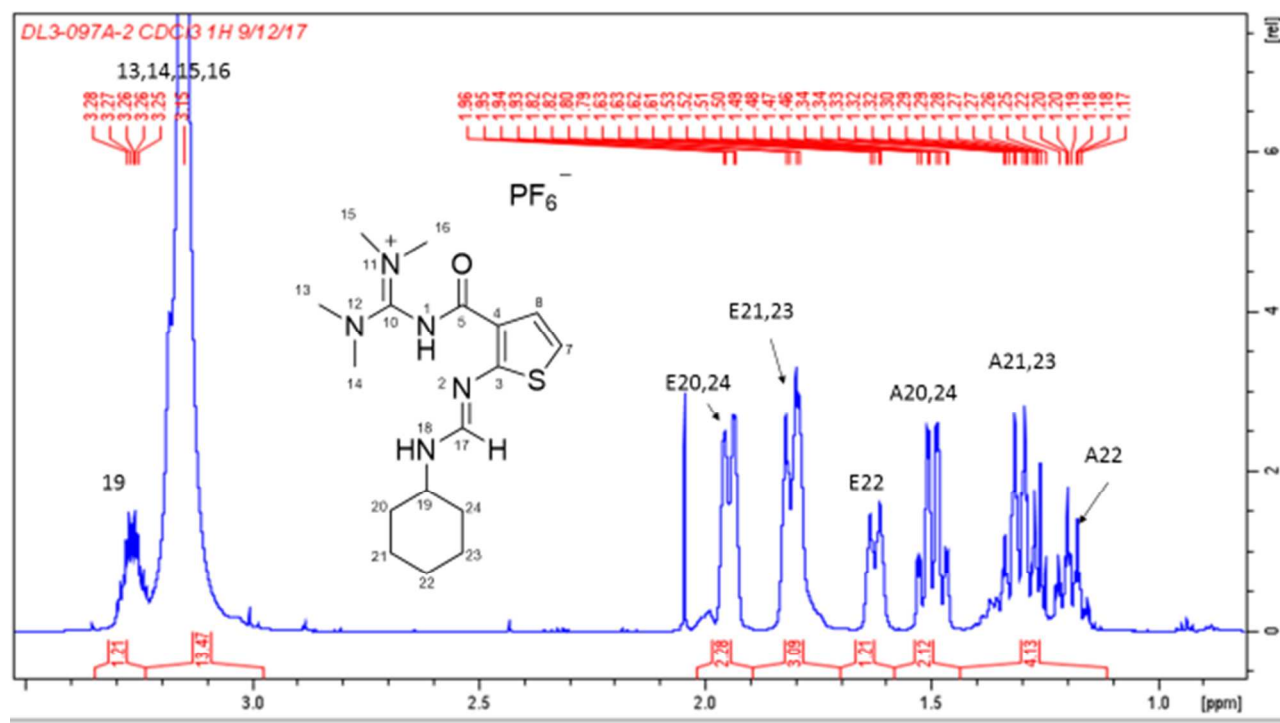

Figure S87. COSY spectra of compound 10.

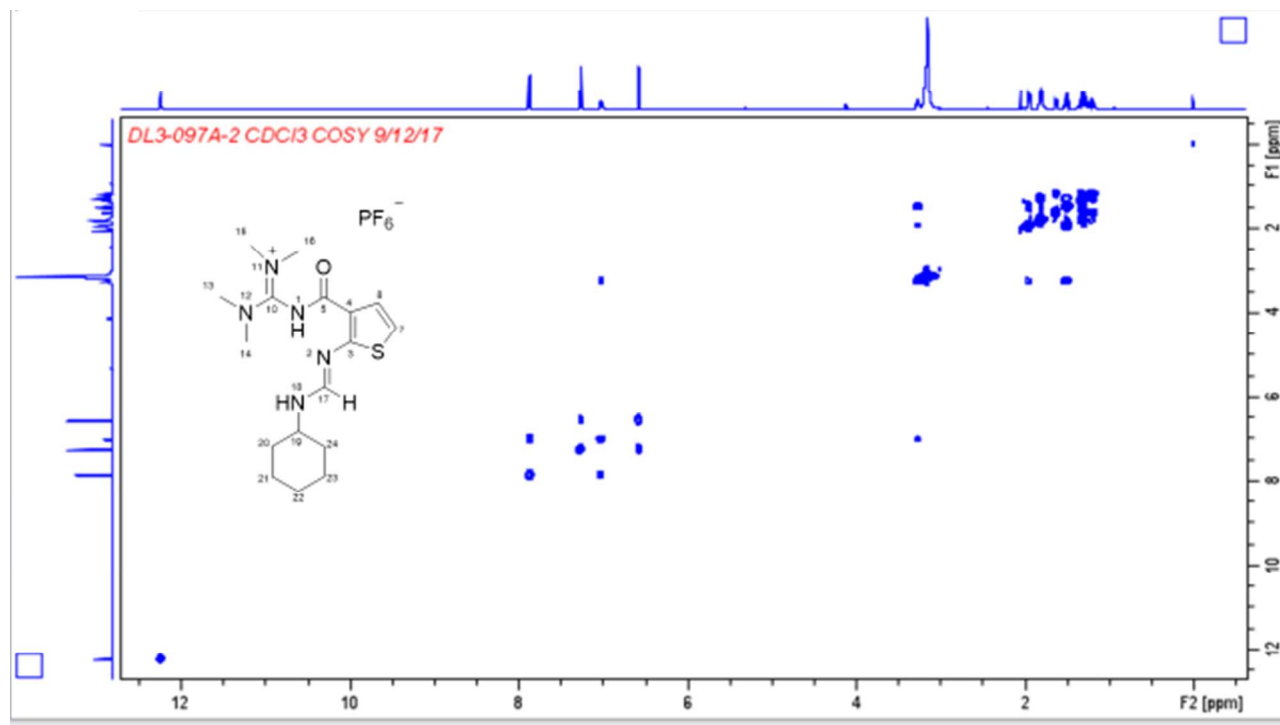

Figure S88. COSY expanded spectra 1 for compound 10.

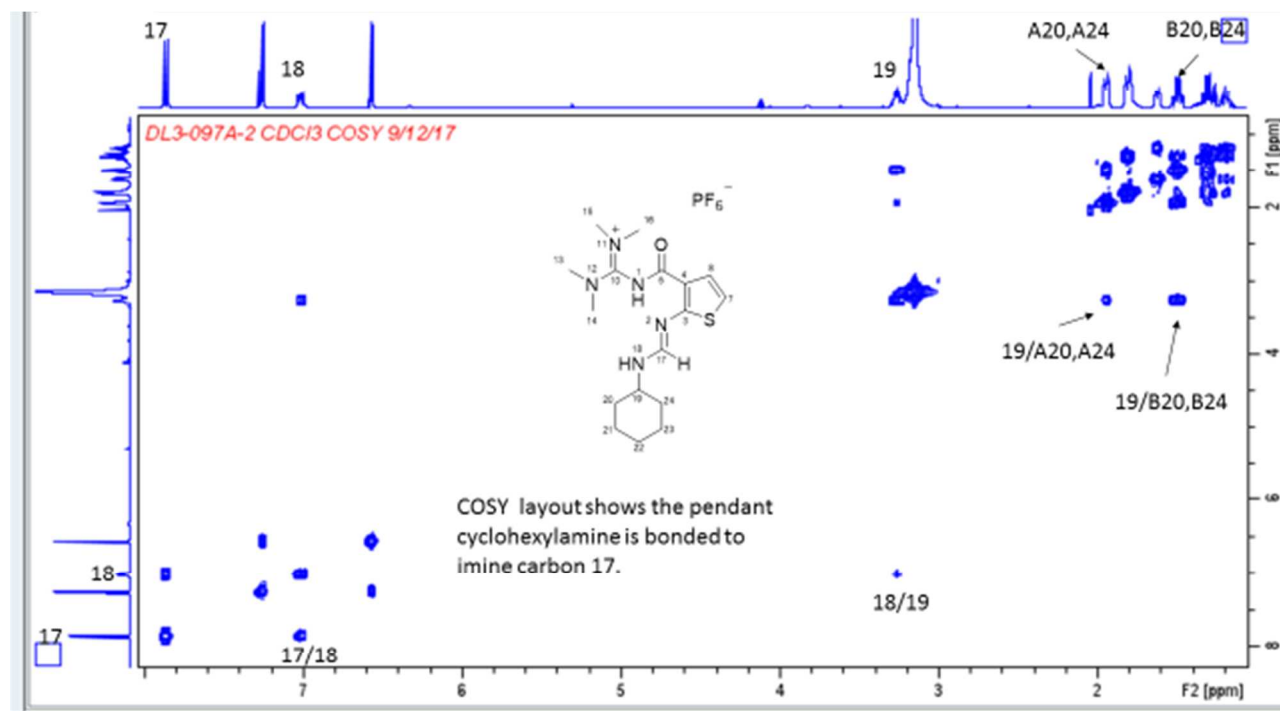

Figure S89.  $^{13}\text{C}$ -HMBC NMR expanded spectra 1 for compound 10.

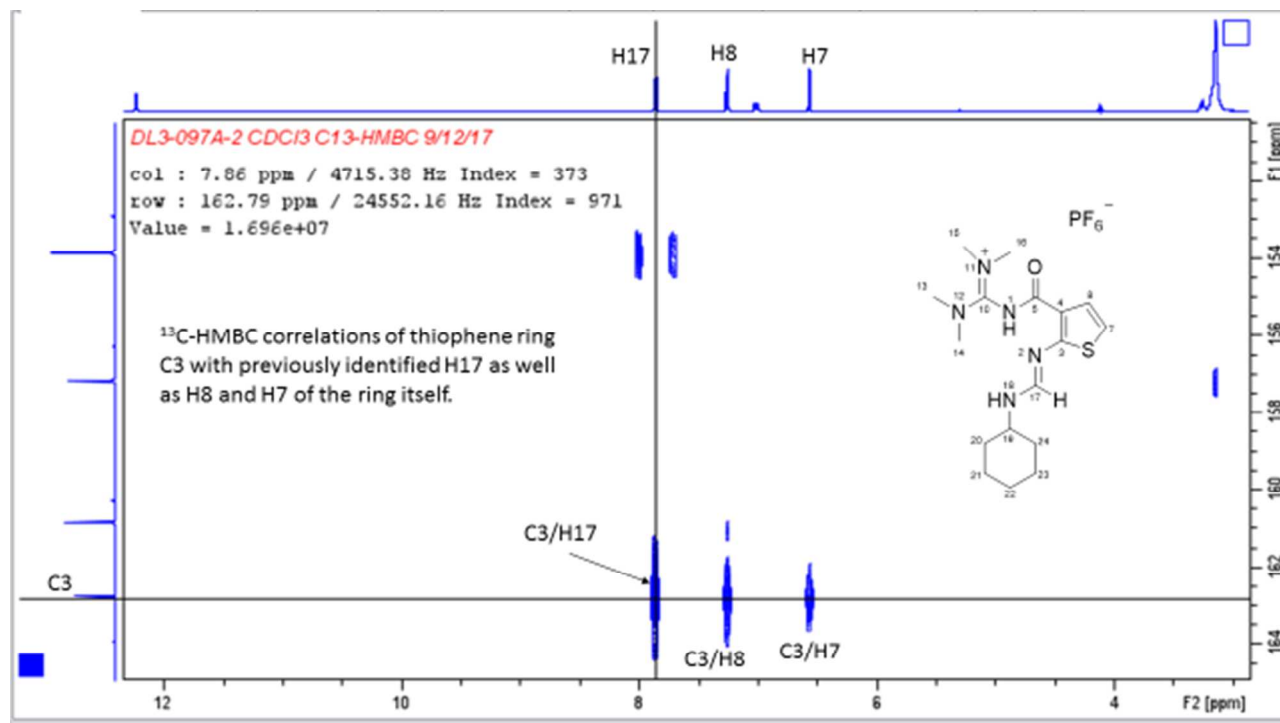

Figure S90.  $^{13}\text{C}$ -HMBC NMR expanded spectra 2 for compound 10.

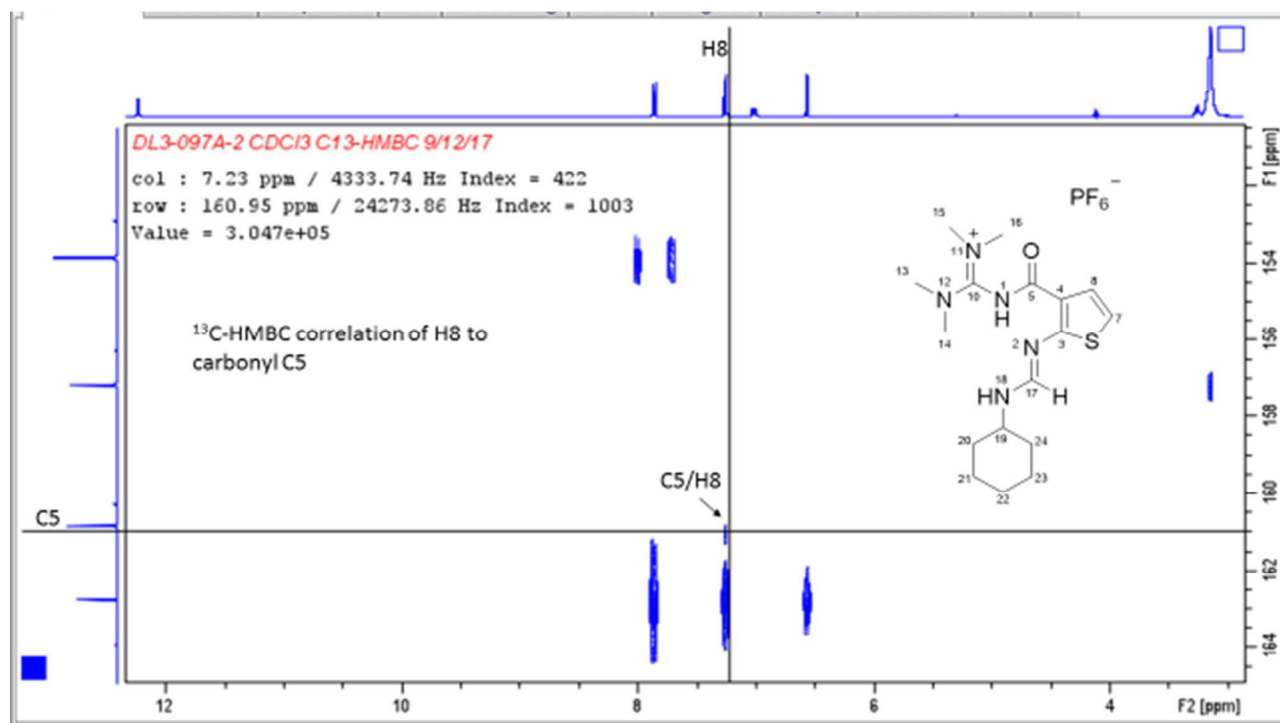

Figure S91.  $^{13}\text{C}$ -HMBC NMR expanded spectra 3 for compound 10.

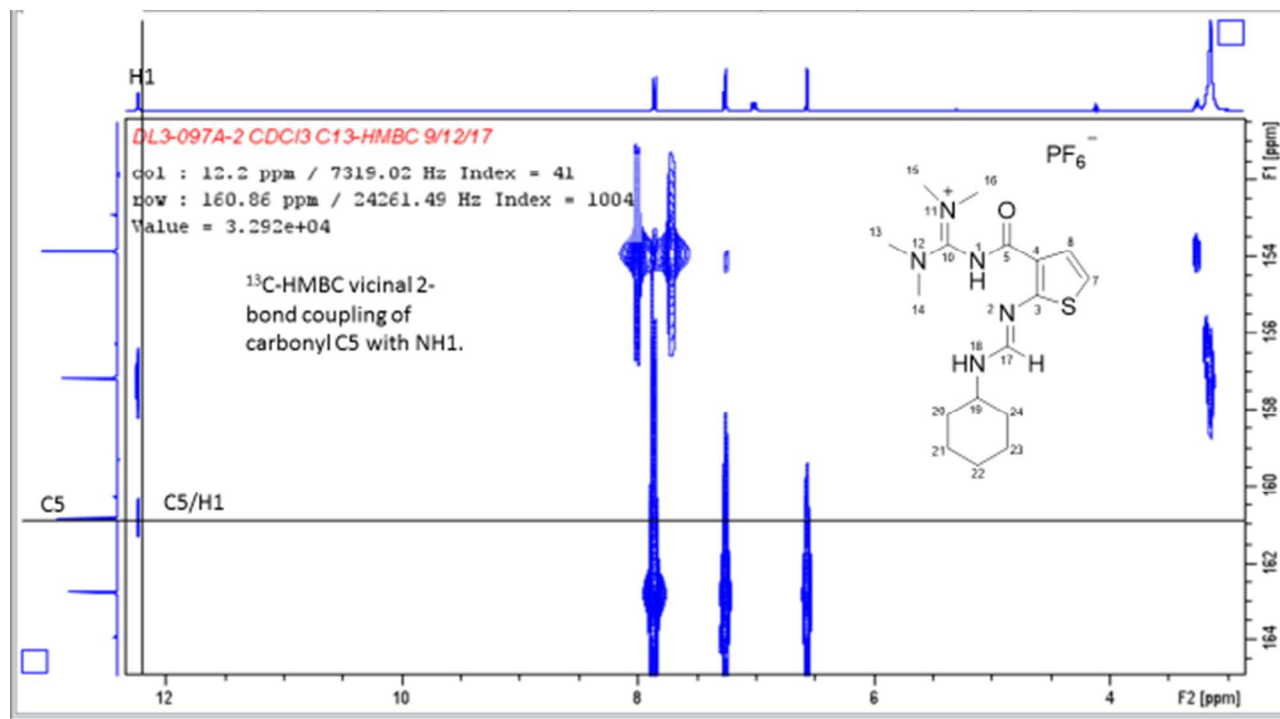

Figure S92.  $^{13}\text{C}$ -HMBC NMR expanded spectra 4 for compound 10.

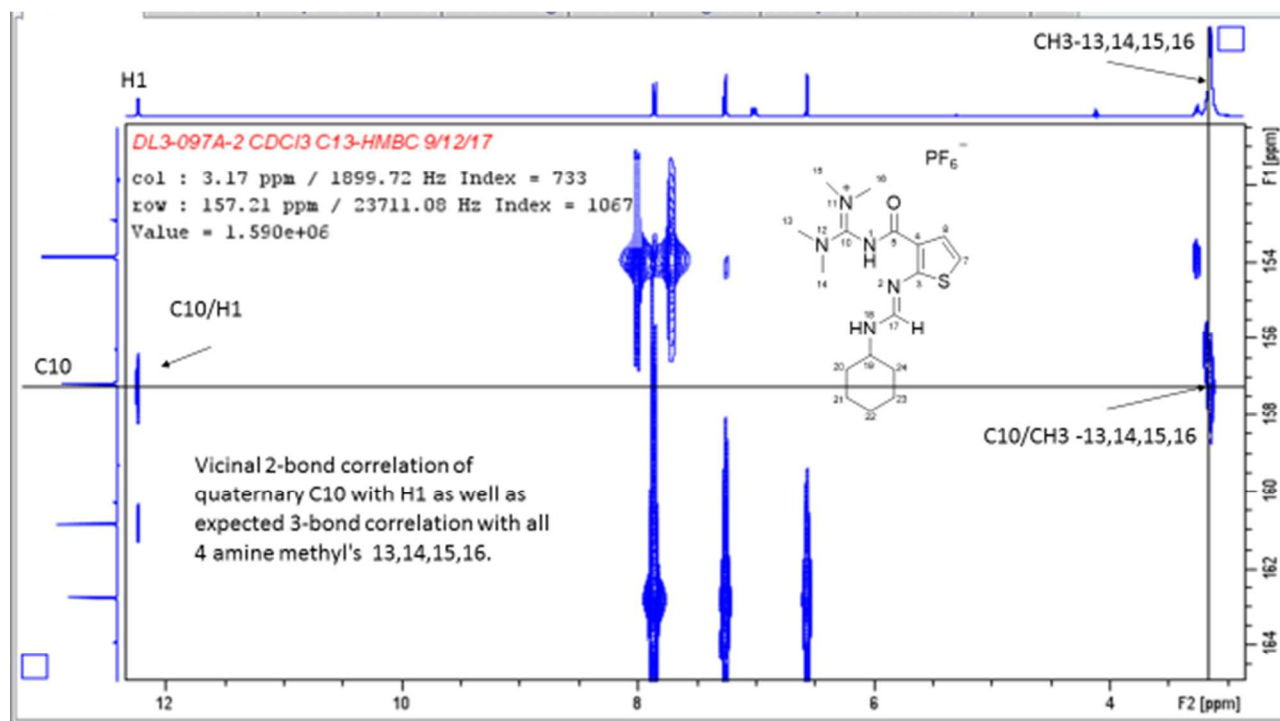

Figure S93.  $^{13}\text{C}$ -HMBC NMR expanded spectra 5 for compound 10.

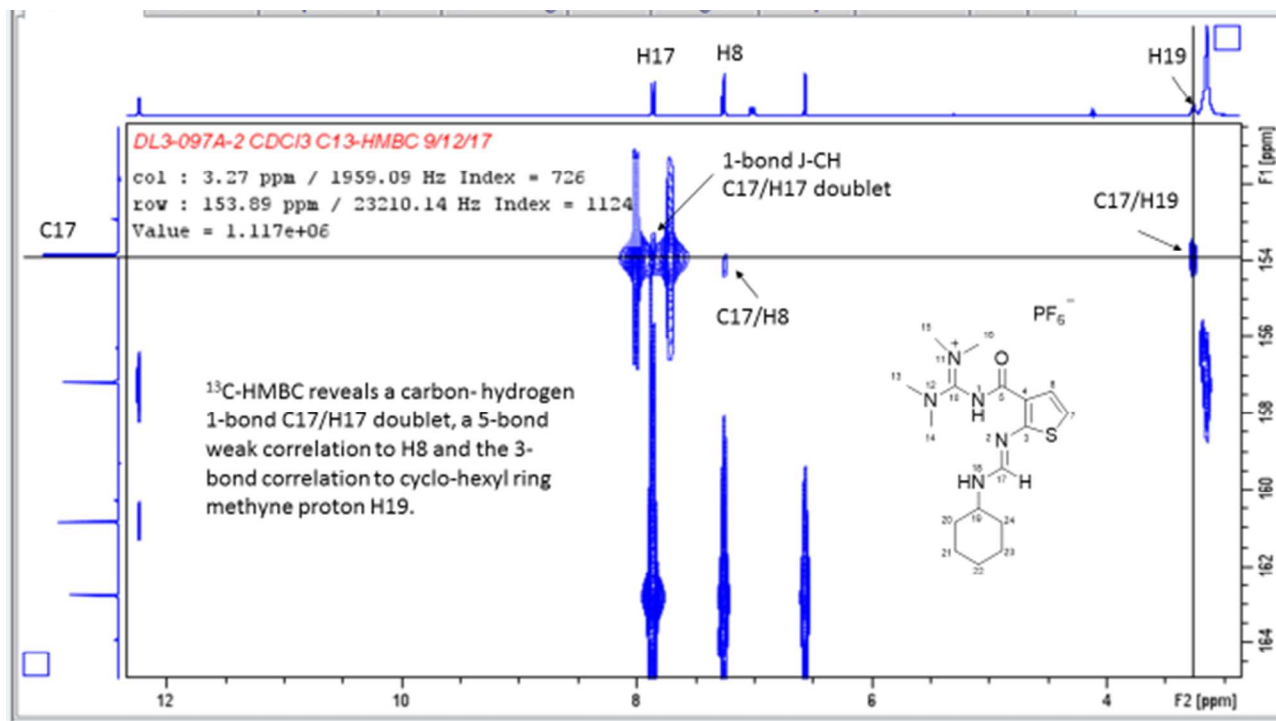

Figure S94.  $^{13}\text{C}$ -HMBC NMR expanded spectra 6 for compound 10.

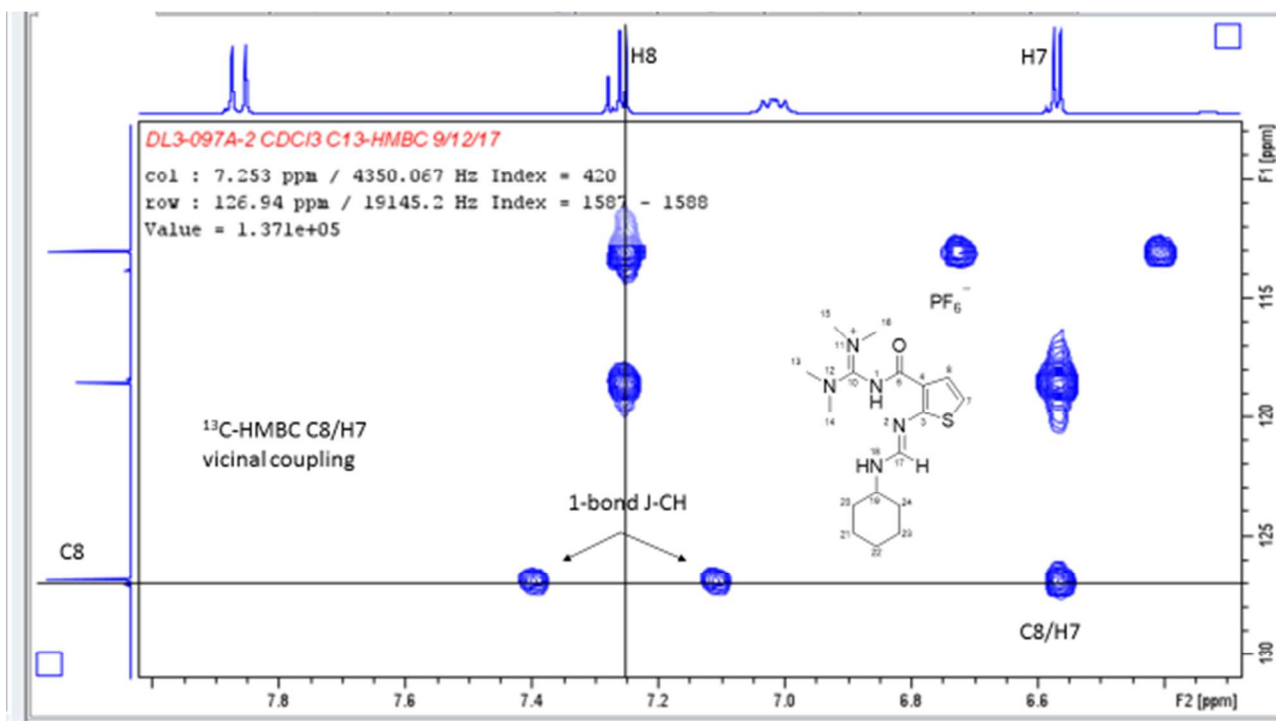

Figure S95.  $^{13}\text{C}$ -HMBC NMR expanded spectra 7 for compound 10.

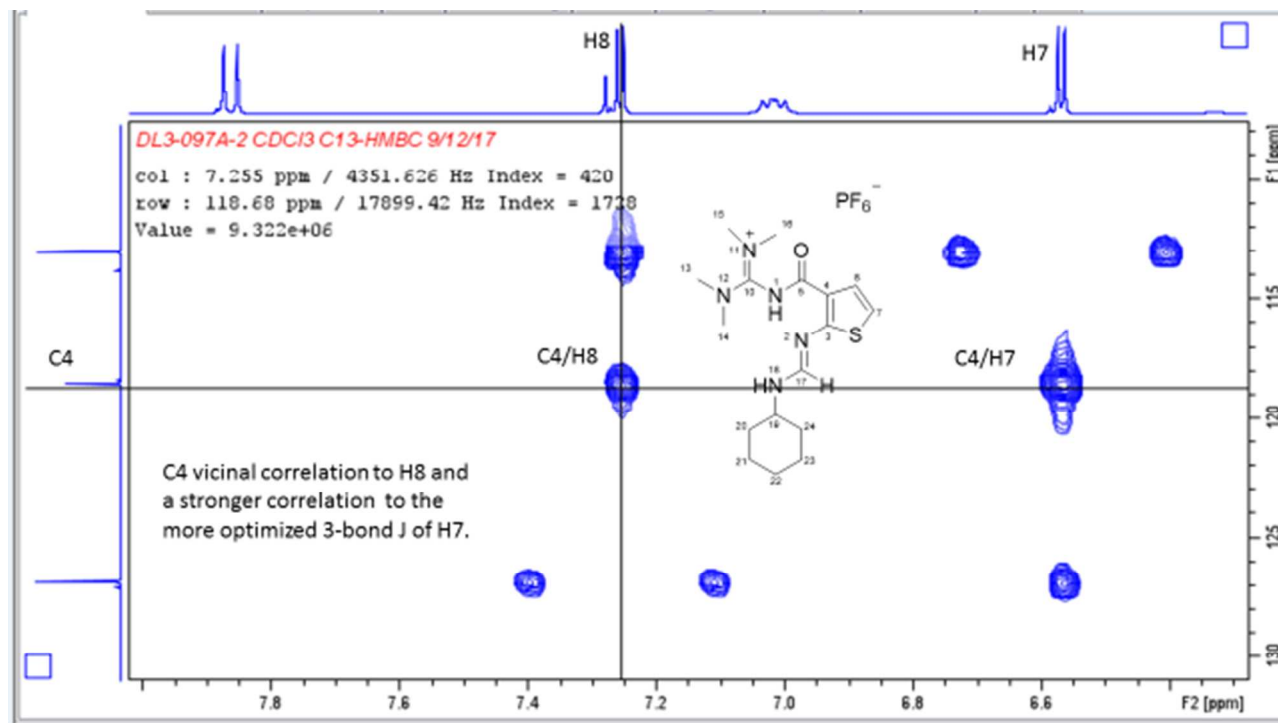

Figure S96.  $^{13}\text{C}$ -HMBC NMR expanded spectra 8 for compound 10.

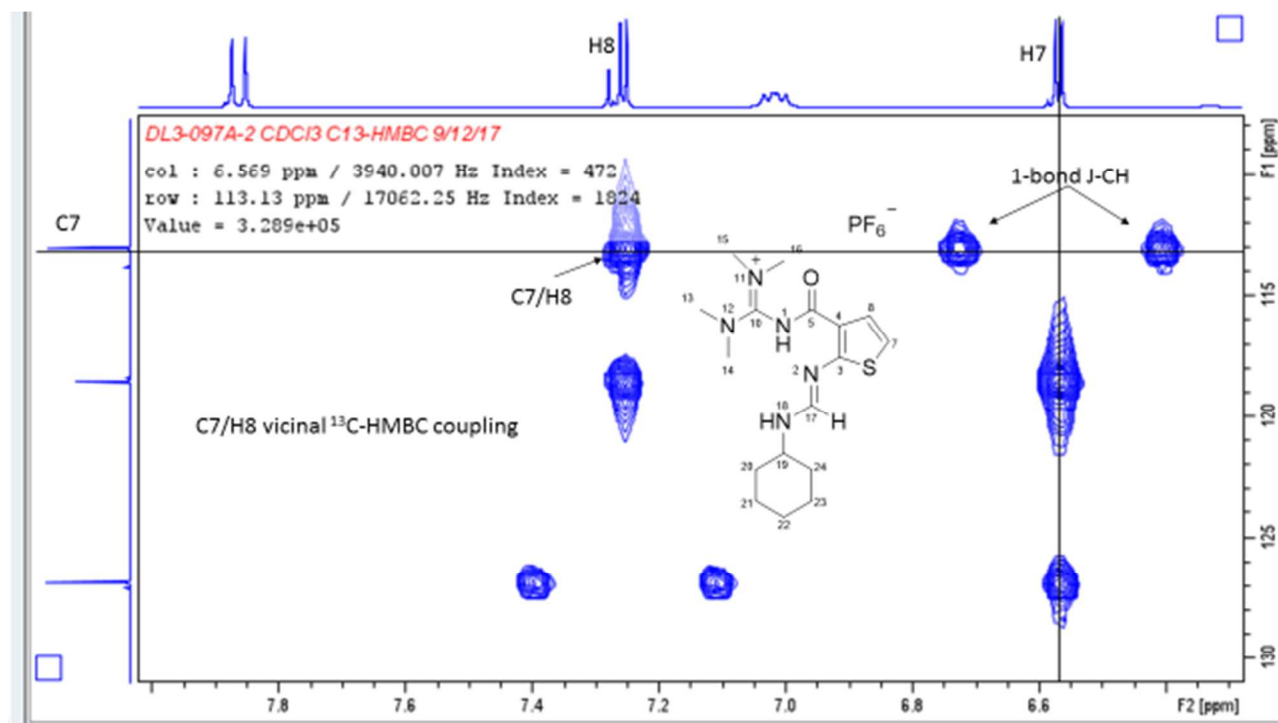

Figure S97. COSY expanded spectra 2 for compound 10.

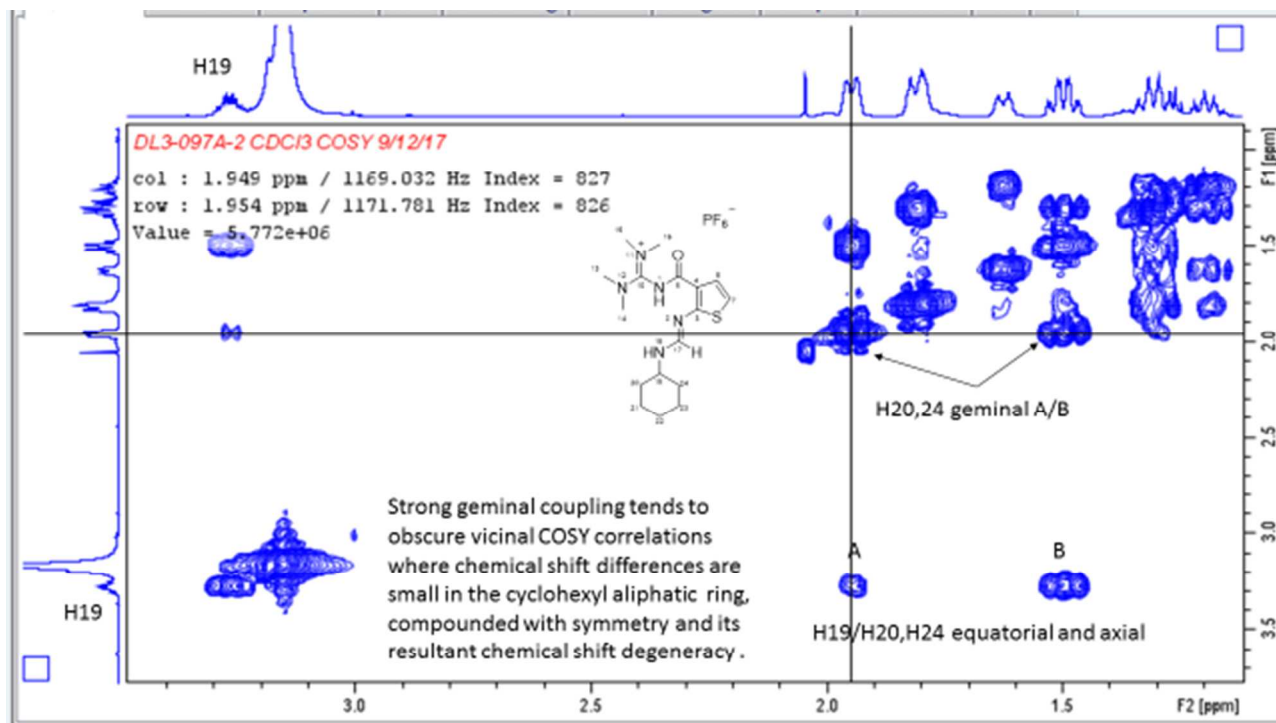

Figure S98. Inverse gated quantitative <sup>13</sup>C NMR spectra for compound 10.

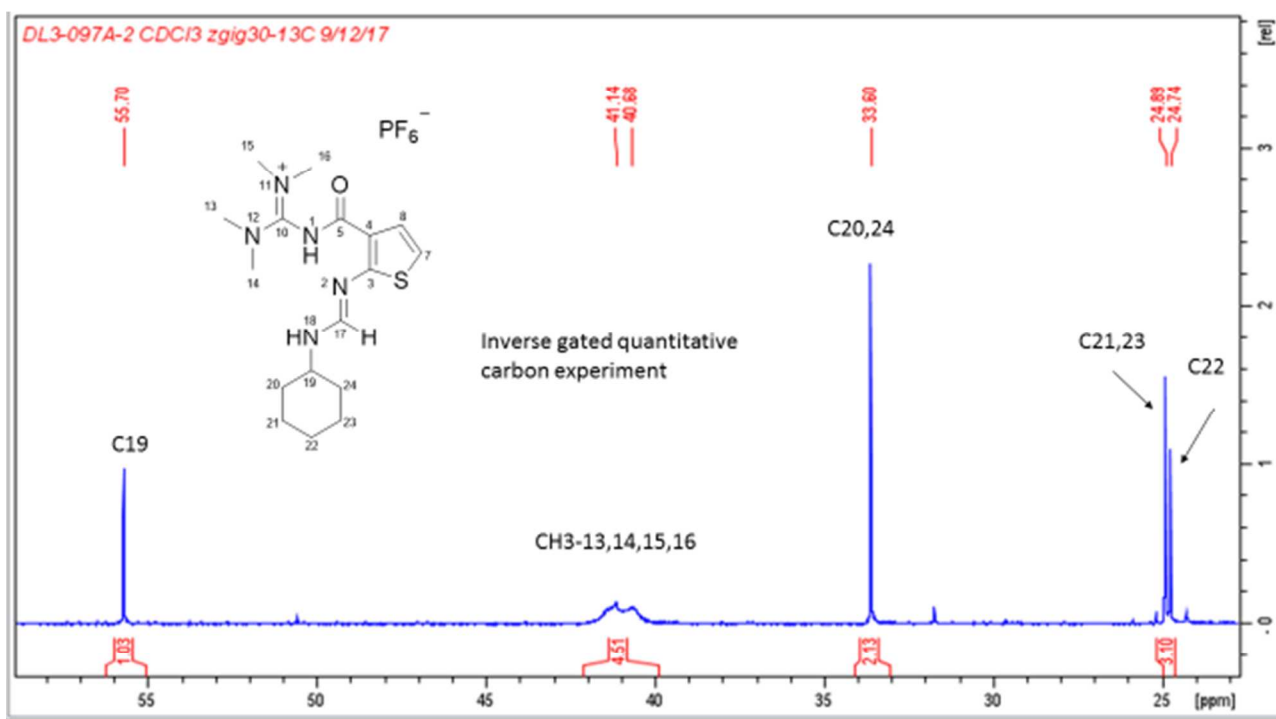



Figure S99. HSQC spectra of compound 10.

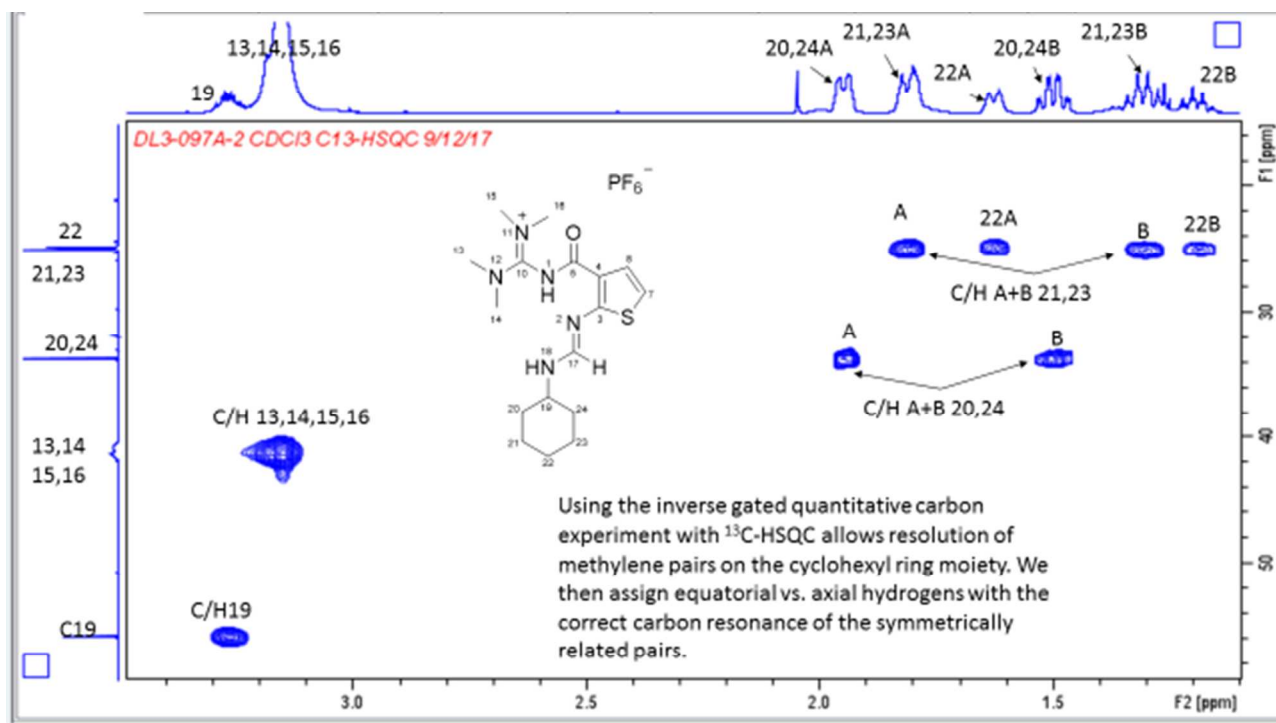

Figure S100. 10 Hz long range  $^{15}\text{N}$ -HMBC spectra of compound 10.

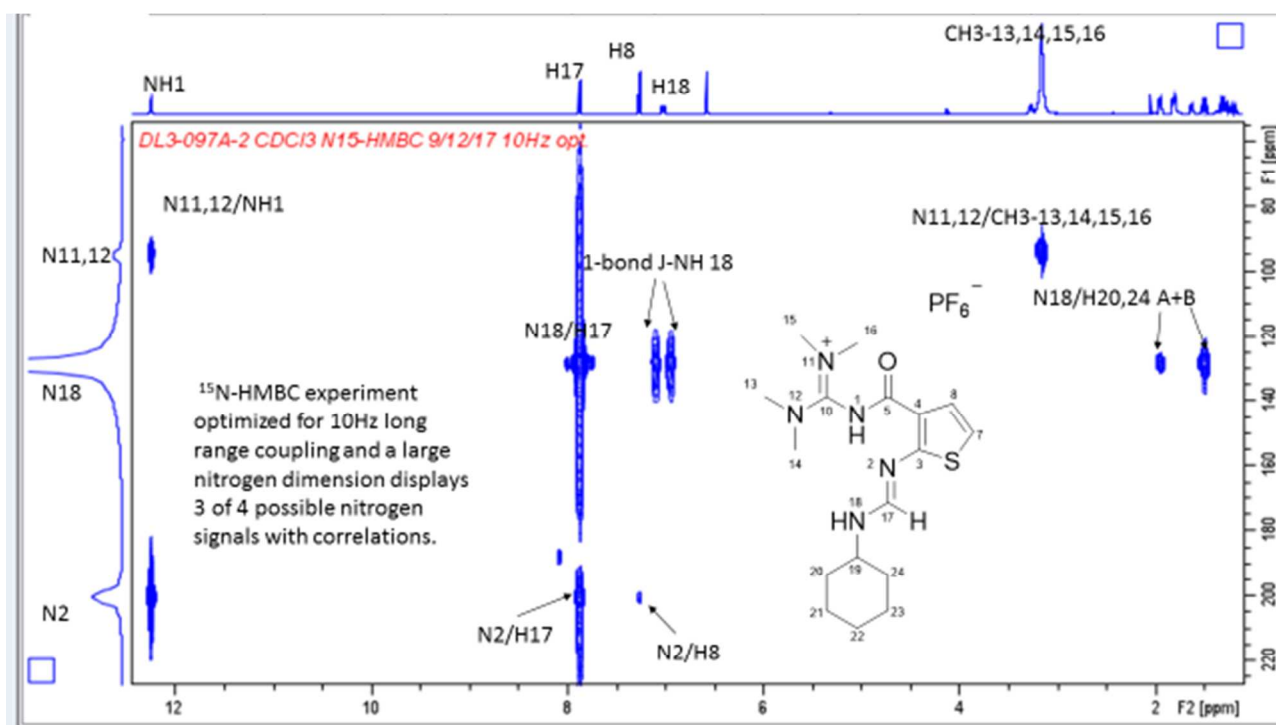

Figure S101. 3 Hz long range  $^{15}\text{N}$ -HMBC spectra of compound 10.

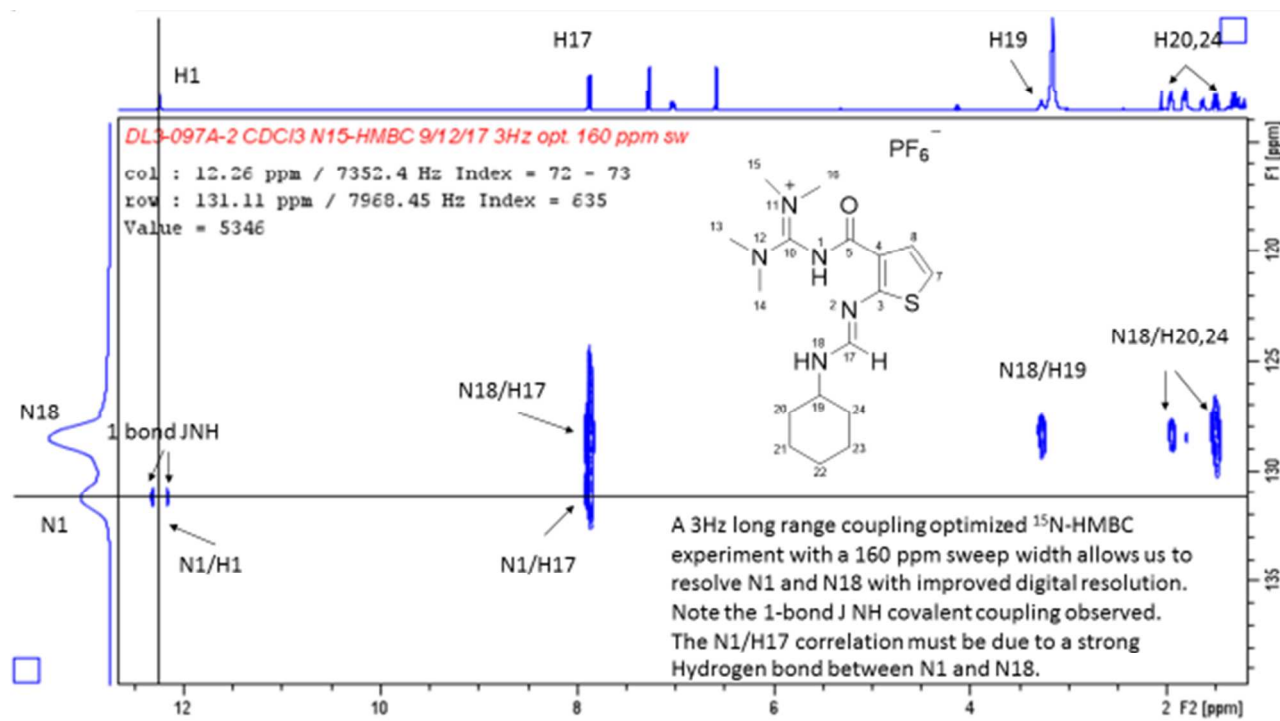

Figure S102.  $^{19}\text{F}$  NMR spectra of compound 10.

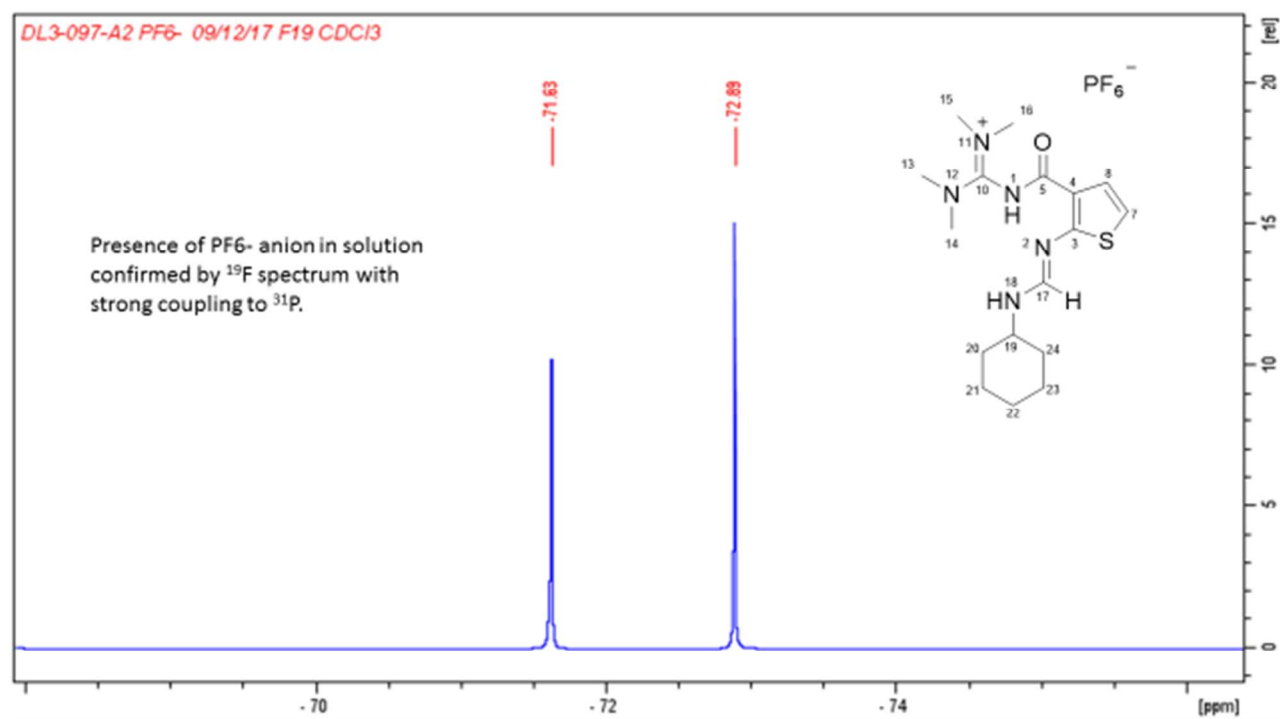

## References

1. Dolomanov, O.V., Bourhis, L.J., Gildea, R.J, Howard, J.A.K. & Puschmann, H. *J. Appl. Cryst.* **2009**, *42*, 339–341.
2. Sheldrick, G.M. *Acta Cryst.* **2008**, *A64*, 112–122.
3. Sheldrick, G.M. *Acta Cryst.* **2015**, *C71*, 3–8.
